# Supplementary material for: Assessing the effect of fish size on species distribution model performance in southern Chilean rivers
Source: PeerJ. 2019 Dec 6;7:e7771. doi: 10.7717/peerj.7771 (PMC6901005; doi:10.7717/peerj.7771)
Supplement: Appendix S1 — All the presences and environmental data by river segment. [file peerj-07-7771-s001.xlsx]

## Sheet: rawdata
ID	Aplochiton_taeniatus	Aplochiton_zebra	Basilichthys_microlepidotus	Brachygalaxias_bullocki	Cheirodon_australe	Diplomystes_camposensis	Galaxias_maculatus	Percilia_gillissi	Trichomycterus_areolatus	Cross-channel structure	Within-channel structure	Land use: Antr-Antr	Land use: Nat-Antr	Land use: Nat-Nat	Altitude	Slope	Channel width	Riparian vegetation	Catchment area	Annual rainfall	Source-of-flow: Lakes	Source-of-flow: Foodplain	Source-of-flow: Mountains	Source-of-flow: Valleys
10100002	NA	NA	NA	NA	NA	NA	NA	NA	NA	0	0	0	0	1	1533	0.135719	4	100	2.82299	4958.36	0	0	0	1
10100003	NA	NA	NA	NA	NA	NA	NA	NA	NA	0	0	0	0	1	1600	0.121413	4	100	7.55591	4958.36	0	0	0	1
10100004	NA	NA	NA	NA	NA	NA	NA	NA	NA	0	0	0	0	1	1336	0.0646766	4	100	12.6502	4958.36	0	0	0	1
10100005	NA	NA	NA	NA	NA	NA	NA	NA	NA	0	0	0	0	1	1450	0.0835398	4	100	6.77557	4958.36	0	0	0	1
10100006	NA	NA	NA	NA	NA	NA	NA	NA	NA	0	0	0	0	1	1460	0.0908125	4	100	14.722	4958.36	0	0	0	1
10100007	NA	NA	NA	NA	NA	NA	NA	NA	NA	0	1	0	0	1	1640	0.0860109	4	100	20.4414	4958.36	0	0	0	1
10100008	NA	NA	NA	NA	NA	NA	NA	NA	NA	0	0	0	0	1	1580	0.0965831	4	100	4.89841	4958.36	0	0	0	1
10100009	NA	NA	NA	NA	NA	NA	NA	NA	NA	0	0	0	0	1	1460	0.15996	4	100	4.23447	4958.36	0	0	0	1
10100010	NA	NA	NA	NA	NA	NA	NA	NA	NA	0	0	0	0	1	1540	0.230872	4	100	3.50983	4958.34	0	0	1	0
10100011	NA	NA	NA	NA	NA	NA	NA	NA	NA	0	0	0	0	1	1610	0.112037	4	100	12.4351	4958.36	0	0	1	0
10100012	NA	NA	NA	NA	NA	NA	NA	NA	NA	0	1	0	0	1	1533	0.233158	4	100	2.95861	4958.36	0	0	1	0
10100013	NA	NA	NA	NA	NA	NA	NA	NA	NA	0	0	0	0	1	1530	0.226633	4	100	2.39116	4882.53	0	0	1	0
10100014	NA	NA	NA	NA	NA	NA	NA	NA	NA	0	0	0	0	1	1050	0.0438215	17	100	77.5229	4958.36	0	0	0	1
10100015	NA	NA	NA	NA	NA	NA	NA	NA	NA	0	0	0	0	1	667	0.00765404	55.6667	100	106.524	4958.36	0	0	1	0
10100016	NA	NA	NA	NA	NA	NA	NA	NA	NA	0	0	0	0	1	627	0.00387755	32	100	130.638	4883.6	0	0	1	0
10100022	NA	NA	NA	NA	NA	NA	NA	NA	NA	0	0	0	0	1	1400	0.188544	6	100	5.61741	4229.72	0	0	1	0
10100023	NA	NA	NA	NA	NA	NA	NA	NA	NA	0	1	0	0	1	1400	0.187426	5	100	4.35975	4154.23	0	0	0	1
10100024	NA	NA	NA	NA	NA	NA	NA	NA	NA	0	0	0	0	1	1030	0.166008	5	100	2.8705	3939.77	0	0	0	1
10100025	NA	NA	NA	NA	NA	NA	NA	NA	NA	0	1	0	0	1	1615	0.128264	6	100	19.9199	4958.34	0	0	0	1
10100026	NA	NA	NA	NA	NA	NA	NA	NA	NA	0	1	0	0	1	1540	0.165071	12	100	19.9574	4958.34	0	0	0	1
10100027	NA	NA	NA	NA	NA	NA	NA	NA	NA	0	0	0	0	1	1440	0.125046	8	100	10.5219	4958.33	0	0	0	1
10100028	NA	NA	NA	NA	NA	NA	NA	NA	NA	0	0	0	0	1	1210	0.159643	4	100	3.68236	4958.33	0	0	0	1
10100029	NA	NA	NA	NA	NA	NA	NA	NA	NA	0	0	0	0	1	763	0.0470769	10	100	18.27	4958.33	0	0	0	1
10100030	NA	NA	NA	NA	NA	NA	NA	NA	NA	0	0	0	0	1	1340	0.0973333	10	100	15.9886	4691.68	0	0	1	0
10100031	NA	NA	NA	NA	NA	NA	NA	NA	NA	0	0	0	0	1	1300	0.145636	5	100	4.69228	4522.35	0	0	0	1
10100032	NA	NA	NA	NA	NA	NA	NA	NA	NA	0	0	0	0	1	1000	0.102148	5	100	10.0164	3942.08	0	0	0	1
10100034	NA	NA	NA	NA	NA	NA	NA	NA	NA	0	0	0	0	1	1480	0.117284	4	100	3.86298	4958.36	0	0	0	1
10100035	NA	NA	NA	NA	NA	NA	NA	NA	NA	0	0	0	0	1	645	0.00541667	38.3333	70	38.9027	4906.13	0	0	1	0
10100036	NA	NA	NA	NA	NA	NA	NA	NA	NA	0	0	0	0	1	619	0.00104895	40	100	111.955	4421.34	0	0	1	0
10100037	NA	NA	NA	NA	NA	NA	NA	NA	NA	0	0	0	0	1	1560	0.184706	6	100	4.91621	4737.63	0	0	1	0
10100038	NA	NA	NA	NA	NA	NA	NA	NA	NA	0	0	0	0	1	1595	0.279598	5	95	4.10586	4227.57	0	0	1	0
10100039	NA	NA	NA	NA	NA	NA	NA	NA	NA	0	0	0	0	1	1600	0.344406	5	100	1.54235	4001.81	0	0	1	0
10100040	NA	NA	NA	NA	NA	NA	NA	NA	NA	0	0	0	0	1	613	0.00238727	47.3333	65	128.185	4352.76	0	0	1	0
10100042	NA	NA	NA	NA	NA	NA	NA	NA	NA	0	0	0	0	1	1005	0.147881	5	100	18.544	4958.36	0	0	1	0
10100043	NA	NA	NA	NA	NA	NA	NA	NA	NA	0	0	0	0	1	610	0.00111111	40	75	474.093	4539.01	0	0	0	1
10100044	NA	NA	NA	NA	NA	NA	NA	NA	NA	0	0	0	0	1	1580	0.285294	6	100	3.30296	4958.33	0	0	1	0
10100045	NA	NA	NA	NA	NA	NA	NA	NA	NA	0	0	0	0	1	1560	0.401861	4	100	1.71619	4958.33	0	0	1	0
10100046	NA	NA	NA	NA	NA	NA	NA	NA	NA	0	0	0	0	1	1412	0.270034	5	100	3.00249	4915.27	0	0	0	1
10100047	NA	NA	NA	NA	NA	NA	NA	NA	NA	0	1	0	0	1	1090	0.235294	5	100	1.81897	4291.26	0	0	0	1
10100048	NA	NA	NA	NA	NA	NA	NA	NA	NA	0	0	0	0	1	1300	0.365079	5	100	1.49465	4486.57	0	0	1	0
10100049	NA	NA	NA	NA	NA	NA	NA	NA	NA	0	0	0	0	1	1480	0.336154	10	100	2.41592	4884.77	0	0	1	0
10101001	NA	NA	NA	NA	NA	NA	NA	NA	NA	0	0	0	0	1	612	0.0190871	136	95	495.542	4511.26	0	0	0	1
10101002	NA	NA	NA	NA	NA	NA	NA	NA	NA	0	1	0	0	1	1180	0.113256	5	100	4.57082	3939.77	0	0	0	1
10101003	NA	NA	NA	NA	NA	NA	NA	NA	NA	0	0	0	0	1	1150	0.099297	6	100	10.981	3939.77	0	0	0	1
10101004	NA	NA	NA	NA	NA	NA	NA	NA	NA	0	0	0	0	1	1500	0.11	6	100	11.7865	3940.6	0	0	0	1
10101005	NA	NA	NA	NA	NA	NA	NA	NA	NA	0	1	0	0	1	1250	0.135838	5	100	16.4978	3939.77	0	0	0	1
10101006	NA	NA	NA	NA	NA	NA	NA	NA	NA	0	1	0	0	1	710	0.105652	6	80	24.4639	3939.77	0	0	0	1
10101007	NA	NA	NA	NA	NA	NA	NA	NA	NA	0	4	0	0	1	1340	0.0864008	5	100	8.76827	3939.77	0	0	0	1
10101008	NA	NA	NA	NA	NA	NA	NA	NA	NA	0	0	1	0	0	520	0.0310511	31	70	561.415	4439.86	0	0	0	1
10101009	NA	NA	NA	NA	NA	NA	NA	NA	NA	0	0	0	0	1	1250	0.328829	5	95	1.08396	3939.77	0	0	0	1
10101010	NA	NA	NA	NA	NA	NA	NA	NA	NA	0	0	0	0	1	1255	0.277358	5	92.5	1.73621	3939.77	0	0	0	1
10101011	NA	NA	NA	NA	NA	NA	NA	NA	NA	0	0	0	0	1	520	0.057554	5	85	6.88169	3939.77	0	0	0	1
10101012	NA	NA	NA	NA	NA	NA	NA	NA	NA	0	0	0	0	1	205	0.006	45	50	765.213	4356.32	1	0	0	0
10101021	NA	NA	NA	NA	NA	NA	NA	NA	NA	0	0	0	0	1	1470	0.239221	5	100	3.30842	3980.72	0	0	1	0
10102001	NA	NA	NA	NA	NA	NA	NA	NA	NA	0	0	0	0	1	1318	0.0911837	8	100	16.0692	4958.34	0	0	0	1
10102002	NA	NA	NA	NA	NA	NA	NA	NA	NA	0	0	0	0	1	941	0.0472279	8	100	40.7815	4958.34	0	0	0	1
10102003	NA	NA	NA	NA	NA	NA	NA	NA	NA	0	0	0	0	1	1193	0.145459	7	80	5.02289	4958.33	0	0	0	1
10102004	NA	NA	NA	NA	NA	NA	NA	NA	NA	0	0	0	0	1	1655	0.299944	7	50	3.3583	4958.33	0	0	0	1
10102005	NA	NA	NA	NA	NA	NA	NA	NA	NA	0	0	0	0	1	578	0.0329146	8	100	93.4123	4958.34	0	0	0	1
10102006	NA	NA	NA	NA	NA	NA	NA	NA	NA	0	0	0	0	1	1371	0.107621	8	50	12.2329	4958.36	0	0	0	1
10102007	NA	NA	NA	NA	NA	NA	NA	NA	NA	0	0	0	0	1	1224	0.117884	7	100	7.78581	4958.36	0	0	0	1
10102008	NA	NA	NA	NA	NA	NA	NA	NA	NA	0	0	0	0	1	803	0.0455696	17	100	33.5456	4958.35	0	0	0	1
10102009	NA	NA	NA	NA	NA	NA	NA	NA	NA	0	0	0	0	1	1510	0.0940685	8	55	21.4286	4958.36	0	0	0	1
10102010	NA	NA	NA	NA	NA	NA	NA	NA	NA	0	0	0	0	1	1457	0.128383	7	85	3.70071	4958.36	0	0	0	1
10102011	NA	NA	NA	NA	NA	NA	NA	NA	NA	0	1	0	0	1	1614	0.194564	8	60	45.6839	4958.35	0	0	0	1
10102012	NA	NA	NA	NA	NA	NA	NA	NA	NA	0	0	0	0	1	1483	0.130952	8	75	8.54962	4958.34	0	0	0	1
10102013	NA	NA	NA	NA	NA	NA	NA	NA	NA	0	0	0	0	1	737	0.0451581	37	100	56.0324	4958.35	0	0	0	1
10102014	NA	NA	NA	NA	NA	NA	NA	NA	NA	0	0	0	0	1	1344	0.160377	7	60	4.9277	4958.36	0	0	0	1
10102015	NA	NA	NA	NA	NA	NA	NA	NA	NA	0	0	0	0	1	1566	0.105648	8	80	11.0611	4958.36	0	0	0	1
10102016	NA	NA	NA	NA	NA	NA	NA	NA	NA	0	0	0	0	1	1541	0.0746065	8	100	30.2251	4958.36	0	0	0	1
10102017	NA	NA	NA	NA	NA	NA	NA	NA	NA	0	0	0	0	1	941	0.0939044	7	85	46.3775	4958.36	0	0	0	1
10102018	NA	NA	NA	NA	NA	NA	NA	NA	NA	0	0	0	0	1	1751	0.0865078	8	95	13.8881	4958.36	0	0	0	1
10102019	NA	NA	NA	NA	NA	NA	NA	NA	NA	0	0	0	0	1	1685	0.0718497	8	70	22.3917	4958.36	0	0	0	1
10102020	NA	NA	NA	NA	NA	NA	NA	NA	NA	0	0	0	0	1	1538	0.0806909	8	100	38.7048	4958.36	0	0	0	1
10102021	NA	NA	NA	NA	NA	NA	NA	NA	NA	0	0	0	0	1	942	0.0503497	7	100	81.4691	4958.36	0	0	0	1
10102022	NA	NA	NA	NA	NA	NA	NA	NA	NA	0	0	0	0	1	1391	0.0803791	8	100	10.8257	4958.34	0	0	0	1
10102023	NA	NA	NA	NA	NA	NA	NA	NA	NA	0	0	0	0	1	1088	0.129185	7	100	76.881	4958.36	0	0	0	1
10102024	NA	NA	NA	NA	NA	NA	NA	NA	NA	0	0	0	0	1	612	0.0111838	28	100	153.919	4958.35	0	0	0	1
10102025	NA	NA	NA	NA	NA	NA	NA	NA	NA	0	0	0	0	1	1340	0.365927	7	90	1.60168	4958.33	0	0	0	1
10102026	NA	NA	NA	NA	NA	NA	NA	NA	NA	0	0	0	0	1	1309	0.168959	7	80	100.109	4958.35	0	0	0	1
10102027	NA	NA	NA	NA	NA	NA	NA	NA	NA	0	0	0	0	1	1277	0.349	7	70	1.10657	4958.33	0	0	1	0
10102028	NA	NA	NA	NA	NA	NA	NA	NA	NA	0	0	0	0	1	1553	0.134519	9	95	8.94434	4869.78	0	0	0	1
10102029	NA	NA	NA	NA	NA	NA	NA	NA	NA	0	0	0	0	1	1639	0.185472	9	95	17.0745	4912.04	0	0	0	1
10102030	NA	NA	NA	NA	NA	NA	NA	NA	NA	0	0	0	0	1	1268	0.195876	7	100	5.22483	4958.33	0	0	0	1
10102031	NA	NA	NA	NA	NA	NA	NA	NA	NA	0	0	0	0	1	474	0.0302144	40	62.5	337.08	4953.87	0	0	0	1
10102032	NA	NA	NA	NA	NA	NA	NA	NA	NA	0	2	0	0	1	938	0.172471	7	95	10.1765	4796.22	0	0	0	1
10102033	NA	NA	NA	NA	NA	NA	NA	NA	NA	1	0	0	0	1	1234	0.254983	7	80	3.26138	4037.05	0	0	0	1
10102034	NA	1	NA	NA	NA	NA	NA	NA	NA	0	0	0	0	1	318	0.0102209	87	75	364.621	4916.09	0	0	0	1
10102035	NA	NA	NA	NA	NA	NA	NA	NA	NA	0	0	0	0	1	834	0.159471	7	80	20.2472	4529.65	0	0	0	1
10102036	NA	NA	NA	NA	NA	NA	NA	NA	NA	0	0	0	0	1	867	0.209974	7	90	4.54837	4099.8	0	0	0	1
10102037	NA	NA	NA	NA	NA	NA	NA	NA	NA	0	0	0	0	1	1155	0.265115	7	60	1.68645	4776.28	0	0	0	1
10102038	NA	NA	NA	NA	NA	NA	NA	NA	NA	0	0	0	0	1	1213	0.278012	7	70	2.40632	4608.86	0	0	1	0
10102039	NA	NA	NA	NA	NA	NA	NA	NA	NA	0	0	0	0	1	1450	0.143836	6	100	5.60417	3939.77	0	0	1	0
10103001	NA	NA	NA	NA	NA	NA	NA	NA	NA	0	0	0	0	1	1581	0.0897638	8	100	22.809	4958.36	0	0	0	1
10103002	NA	NA	NA	NA	NA	NA	NA	NA	NA	0	0	0	0	1	1540	0.11733	8	100	7.68173	4956.63	0	0	0	1
10103003	NA	NA	NA	NA	NA	NA	NA	NA	NA	0	0	0	0	1	1052	0.0726305	7	100	6.50049	4939.54	0	0	0	1
10103004	NA	NA	NA	NA	NA	NA	NA	NA	NA	0	0	0	0	1	1433	0.0754756	8	100	41.6489	4937.6	0	0	0	1
10103005	NA	NA	NA	NA	NA	NA	NA	NA	NA	0	0	0	0	1	699	0.0574266	8	100	97.823	4571.22	0	0	0	1
10103006	NA	NA	NA	NA	NA	NA	NA	NA	NA	0	0	0	0	1	1211	0.101163	7	100	5.01382	4831.24	0	0	0	1
10103007	NA	NA	NA	NA	NA	NA	NA	NA	NA	0	0	0	0	1	849	0.0497006	8	100	42.8119	4209.45	0	0	1	0
10103008	NA	NA	NA	NA	NA	NA	NA	NA	NA	0	0	0	0	1	1180	0.115378	8	100	41.0095	4217.75	0	0	0	1
10103009	NA	1	NA	NA	NA	NA	NA	NA	NA	0	0	0	0	1	450	0.030199	34	100	134.016	4536.11	0	0	0	1
10103010	NA	NA	NA	NA	NA	NA	NA	NA	NA	0	0	0	0	1	980	0.187658	7	100	2.69606	4634.83	0	0	0	1
10103011	NA	NA	NA	NA	NA	NA	NA	NA	NA	0	0	0	0	1	1110	0.078191	7	100	9.38728	4926.09	0	0	0	1
10103012	NA	NA	NA	NA	NA	NA	NA	NA	NA	0	1	0	0	1	995	0.122533	7	100	13.4551	4860.5	0	0	1	0
10103013	NA	NA	NA	NA	NA	NA	NA	NA	NA	0	0	0	0	1	1226	0.226663	7	100	2.88186	4613.49	0	0	0	1
10103014	NA	NA	NA	NA	NA	NA	NA	NA	NA	0	1	0	0	1	1050	0.143655	7	100	5.69194	3880.84	0	0	0	1
10103015	NA	NA	NA	NA	NA	NA	NA	NA	NA	0	0	0	0	1	224	0.00405797	33	100	502.722	4804.95	0	0	1	0
10103016	NA	NA	NA	NA	NA	NA	NA	NA	NA	0	0	0	0	1	725	0.128109	7	70	2.28141	3193.78	0	0	1	0
10103017	NA	NA	NA	NA	NA	NA	NA	NA	NA	0	0	0	0	1	927	0.148739	7	100	2.23519	3036.63	0	0	0	1
10103018	NA	NA	NA	NA	NA	NA	NA	NA	NA	0	0	0	0	1	349	0.0329228	7	100	22.6488	2946.67	0	0	0	1
10103019	NA	NA	NA	NA	NA	NA	NA	NA	NA	0	0	0	0	1	1100	0.0865724	15	100	18.4312	3939.77	0	0	1	0
10103020	NA	NA	NA	NA	NA	NA	NA	NA	NA	0	1	0	0	1	520	0.100163	7	100	2.20216	3701.22	0	0	1	0
10103021	NA	NA	NA	NA	NA	NA	NA	NA	NA	0	0	0	0	1	1050	0.198158	7	100	3.44233	2899.29	0	0	0	1
10103022	NA	NA	NA	NA	NA	NA	NA	NA	NA	0	0	0	0	1	210	0.000682439	28	100	581.011	4613.97	0	0	0	1
10103023	1	NA	NA	NA	1	NA	NA	NA	NA	0	0	0	0	1	208	0.00155486	30	100	649.497	4444.54	0	0	1	0
10103024	NA	NA	NA	NA	NA	NA	NA	NA	NA	0	0	0	0	1	1184	0.13573	7	100	8.04408	2899.37	0	0	0	1
10103025	NA	NA	NA	NA	NA	NA	NA	NA	NA	0	0	0	0	1	1095	0.217324	7	100	5.98178	2899.4	0	0	0	1
10103026	NA	NA	NA	NA	NA	NA	NA	NA	NA	0	0	0	0	1	596	0.0498397	10	100	17.2418	2903.38	0	0	0	1
10103027	NA	NA	NA	NA	NA	NA	NA	NA	NA	0	0	0	0	1	425	0.0369748	30	100	40.241	2901.42	0	0	0	1
10103028	NA	NA	NA	NA	NA	NA	NA	NA	NA	0	0	0	0	1	1164	0.130967	8	90	9.08869	3656.86	0	0	0	1
10103029	NA	NA	NA	NA	NA	NA	NA	NA	NA	0	0	0	0	1	1232	0.129477	8	100	6.00137	3832.5	0	0	0	1
10103030	NA	NA	NA	NA	NA	NA	NA	NA	NA	0	0	0	0	1	1208	0.217192	9	100	7.17559	3796.84	1	0	0	0
10103031	NA	NA	NA	NA	NA	NA	NA	NA	NA	0	0	0	0	1	1346	0.159781	8	100	2.01539	3939.77	1	0	0	0
10103032	NA	NA	NA	NA	NA	NA	NA	NA	NA	0	0	0	0	1	1409	0.113391	8	80	6.80852	4873.96	0	0	1	0
10103033	NA	NA	NA	NA	NA	NA	NA	NA	NA	0	0	0	0	1	1172	0.0673788	9	100	25.0136	4360.52	0	0	0	1
10103034	NA	NA	NA	NA	NA	NA	NA	NA	NA	0	1	0	0	1	1320	0.231744	7	100	1.8607	4670.05	0	0	1	0
10103035	NA	NA	NA	NA	NA	NA	NA	NA	NA	0	0	0	0	1	675	0.0256259	7	100	38.4976	4216.51	0	0	0	1
10103036	NA	NA	NA	NA	NA	NA	NA	NA	NA	0	0	0	0	1	910	0.107306	7	100	7.3987	3955.88	0	0	0	1
10103037	NA	NA	NA	NA	NA	NA	NA	NA	NA	0	0	0	0	1	1157	0.123107	8	95	10.2543	3939.77	0	0	1	0
10103038	NA	NA	NA	NA	NA	NA	NA	NA	NA	0	0	0	0	1	588	0.0513125	8	77.5	69.837	4092.2	0	0	1	0
10103039	NA	NA	NA	NA	NA	NA	NA	NA	NA	0	0	0	0	1	1216	0.134038	7	100	11.7181	2899.29	0	0	0	1
10104001	1	1	NA	NA	NA	NA	NA	1	1	0	0	0	1	0	200	0.00988593	87.6667	80	1336	4387.23	0	0	0	1
10104002	NA	NA	NA	NA	NA	NA	NA	NA	NA	0	0	0	0	1	1115	0.116015	23.6667	95	17.2302	3939.77	0	0	0	1
10104003	NA	NA	NA	NA	NA	NA	NA	NA	NA	0	1	0	0	1	1580	0.161121	5	100	9.20915	3939.77	0	0	0	1
10104004	NA	NA	NA	NA	NA	NA	NA	NA	NA	0	0	1	0	0	370	0.0608108	5	70	8.86982	3939.77	0	0	0	1
10104005	NA	NA	NA	NA	NA	NA	NA	NA	NA	0	0	0	0	1	252	0.0339973	6	95	9.80003	3939.77	0	0	0	1
10104018	NA	NA	NA	NA	NA	NA	NA	NA	NA	0	0	0	0	1	1350	0.119048	5	100	5.38638	3939.77	0	0	1	0
10105001	NA	NA	NA	NA	NA	NA	NA	NA	NA	0	0	0	0	1	1682	0.107789	8	90	8.98837	4958.36	0	0	0	1
10105002	NA	NA	NA	NA	NA	NA	NA	NA	NA	0	0	0	0	1	1568	0.156823	7	100	28.885	4958.36	0	0	0	1
10105003	NA	NA	NA	NA	NA	NA	NA	NA	NA	0	0	0	0	1	1431	0.145192	7	100	5.4699	4958.36	0	0	1	0
10105004	NA	NA	NA	NA	NA	NA	NA	NA	NA	0	0	0	0	1	1188	0.108977	7	100	21.2839	4958.36	0	0	1	0
10105005	NA	NA	NA	NA	NA	NA	NA	NA	NA	0	0	0	0	1	1567	0.135315	7	65	6.92476	4190.47	0	0	1	0
10105006	NA	NA	NA	NA	NA	NA	NA	NA	NA	0	0	0	0	1	1607	0.18903	7	50	2.27604	4692.75	0	0	1	0
10105007	NA	NA	NA	NA	NA	NA	NA	NA	NA	0	0	0	0	1	1455	0.161008	7	100	19.4433	4631.38	0	0	1	0
10105008	NA	NA	NA	NA	NA	NA	NA	NA	NA	0	0	0	0	1	1221	0.0509532	8	100	71.0601	4868.82	0	0	1	0
10105009	NA	NA	NA	NA	NA	NA	NA	NA	NA	0	0	0	0	1	944	0.0451014	8	100	103.501	4869.94	0	0	1	0
10105010	NA	NA	NA	NA	NA	NA	NA	NA	NA	0	0	0	0	1	1130	0.122764	7	100	8.66414	4862.29	0	0	1	0
10105011	NA	NA	NA	NA	NA	NA	NA	NA	NA	0	0	0	0	1	1561	0.168851	7	60	6.4176	4828.65	0	0	1	0
10105012	NA	NA	NA	NA	NA	NA	NA	NA	NA	0	0	0	0	1	1441	0.202077	7	80	10.7957	4881.38	0	0	1	0
10105013	NA	NA	NA	NA	NA	NA	NA	NA	NA	0	0	0	0	1	1498	0.149403	8	70	7.93717	4711.16	0	0	1	0
10105014	NA	NA	NA	NA	NA	NA	NA	NA	NA	0	0	0	0	1	677	0.0459962	8	90	192.526	4679.23	0	0	0	1
10105015	NA	NA	NA	NA	NA	NA	NA	NA	NA	0	0	0	0	1	1192	0.152508	7	100	8.31948	4871.26	0	0	0	1
10105016	NA	NA	NA	NA	NA	NA	NA	NA	NA	0	0	0	0	1	1082	0.0892094	7	100	7.02309	4882.15	0	0	0	1
10105017	NA	NA	NA	NA	NA	NA	NA	NA	NA	0	0	0	0	1	1533	0.0492084	8	100	24.7982	4958.35	0	0	0	1
10105018	NA	NA	NA	NA	NA	NA	NA	NA	NA	0	0	0	0	1	1515	0.094949	7	100	13.1312	4958.36	0	0	0	1
10105019	NA	NA	NA	NA	NA	NA	NA	NA	NA	0	0	0	0	1	1073	0.0842215	8	80	39.1764	4662.29	0	0	0	1
10105020	NA	NA	NA	NA	NA	NA	NA	NA	NA	0	0	0	0	1	524	0.0475202	7	100	46.6163	4490.89	0	0	0	1
10105021	1	1	NA	NA	NA	NA	NA	NA	NA	0	0	0	0	1	318	0.0126904	8	100	197.53	4649.28	0	0	1	0
10105022	NA	NA	NA	NA	NA	NA	NA	NA	NA	0	0	0	0	1	728	0.169549	7	100	4.52796	3188.17	0	0	0	1
10105023	NA	NA	NA	NA	NA	NA	NA	NA	NA	0	0	0	0	1	966	0.112734	8	100	17.0071	2999.11	0	0	0	1
10105024	NA	NA	NA	NA	NA	NA	NA	NA	NA	0	0	0	0	1	1276	0.273035	7	100	3.10654	2899.29	0	0	0	1
10105025	NA	NA	NA	NA	NA	NA	NA	NA	NA	0	0	0	0	1	1272	0.188523	8	85	12.6456	2899.35	0	0	0	1
10105026	NA	NA	NA	NA	NA	NA	NA	NA	NA	0	0	0	0	1	225	0.0017517	7	70	275.953	4169.12	0	0	1	0
10105027	NA	NA	NA	NA	NA	NA	NA	NA	NA	0	0	0	0	1	1460	0.147844	5	100	2.49812	3939.77	0	0	1	0
10106001	NA	NA	NA	NA	NA	NA	NA	NA	NA	0	0	0	0	1	1654	0.104109	7	100	6.22185	4122.12	0	0	1	0
10106002	NA	NA	NA	NA	NA	NA	NA	NA	NA	0	0	0	0	1	1564	0.0961089	7	100	2.92323	4142.07	0	0	1	0
10106003	NA	NA	NA	NA	NA	NA	NA	NA	NA	0	0	0	0	1	1317	0.0936013	8	100	21.1058	4334.25	0	0	1	0
10106004	NA	NA	NA	NA	NA	NA	NA	NA	NA	0	2	0	0	1	1350	0.10884	8	100	10.2095	4127.93	0	0	0	1
10106005	NA	NA	NA	NA	NA	NA	NA	NA	NA	0	2	0	0	1	530	0.049118	8	100	33.9883	4190.78	0	0	0	1
10106006	NA	NA	NA	NA	NA	NA	NA	NA	NA	0	0	0	0	1	1478	0.0874682	7	50	6.34763	3947.31	0	0	0	1
10106007	NA	NA	NA	NA	NA	NA	NA	NA	NA	0	0	0	0	1	1409	0.0849485	7	95	8.2701	3945.52	0	0	0	1
10106008	NA	NA	NA	NA	NA	NA	NA	NA	NA	0	0	0	0	1	1203	0.106599	7	100	11.1686	3945.86	0	0	0	1
10106009	NA	NA	NA	NA	NA	NA	NA	NA	NA	0	0	0	0	1	1360	0.0846271	7	90	11.3915	3933.78	0	0	0	1
10106010	NA	NA	NA	NA	NA	NA	NA	NA	NA	0	0	0	0	1	1312	0.0589744	7	90	7.7907	3930.98	0	0	0	1
10106011	NA	NA	NA	NA	NA	NA	NA	NA	NA	0	0	0	0	1	1082	0.0746978	7	95	25.9062	3939.76	0	0	0	1
10106012	NA	NA	NA	NA	NA	NA	NA	NA	NA	0	0	0	0	1	909	0.109666	8	100	32.3257	3885.32	0	0	0	1
10106013	NA	NA	NA	NA	NA	NA	NA	NA	NA	0	1	0	0	1	797	0.101646	8	60	10.1839	3615.45	0	0	0	1
10106014	NA	NA	NA	NA	NA	NA	NA	NA	NA	0	0	0	0	1	1627	0.0918899	8	80	7.58899	3939.3	0	0	0	1
10106015	NA	1	NA	NA	NA	NA	NA	NA	NA	0	0	0	0	1	869	0.0958406	8	100	21.3142	3555.2	0	0	0	1
10106016	NA	NA	NA	NA	NA	NA	NA	NA	NA	0	0	0	0	1	1682	0.121333	8	75	17.9307	3800.6	0	0	0	1
10106017	NA	NA	NA	NA	NA	NA	NA	NA	NA	0	0	0	0	1	681	0.0651309	8	80	50.8992	3327.69	0	0	0	1
10106018	NA	NA	NA	NA	NA	NA	NA	NA	NA	0	0	0	0	1	1381	0.103735	7	100	5.06723	3227.71	0	0	0	1
10106019	NA	NA	NA	NA	NA	NA	NA	NA	NA	0	0	0	0	1	1381	0.108166	8	60	49.9959	3335.32	0	0	0	1
10106020	NA	NA	NA	NA	NA	NA	NA	NA	NA	0	0	0	0	1	689	0.0403767	8	70	35.1001	2766.67	0	0	0	1
10106021	NA	NA	NA	NA	NA	NA	NA	NA	NA	0	1	1	0	0	346	0.0221901	8	50	37.8749	2761.05	0	0	0	1
10106022	NA	NA	NA	NA	NA	NA	NA	NA	NA	0	4	0	0	1	376	0.0674349	7	70	2.53589	2690.11	0	0	0	1
10106023	NA	NA	NA	NA	NA	NA	NA	NA	NA	0	0	0	0	1	802	0.117056	7	70	3.45445	2690.11	0	0	0	1
10106024	NA	NA	NA	NA	NA	NA	NA	NA	NA	0	1	0	0	1	969	0.116996	8	50	6.39182	2660.05	0	0	0	1
10106025	NA	NA	NA	NA	NA	NA	NA	NA	NA	0	2	0	0	1	860	0.075345	8	75	10.9328	2629.7	0	0	0	1
10106026	NA	NA	NA	NA	NA	NA	NA	NA	NA	0	0	1	0	0	318	0.0218788	7	50	7.79403	2456.49	0	1	0	0
10106027	NA	NA	NA	NA	NA	NA	NA	NA	NA	0	3	0	0	1	713	0.105263	7	70	1.24475	2423.98	0	1	0	0
10106028	NA	NA	NA	NA	NA	NA	NA	NA	NA	0	1	0	0	1	383	0.0288349	8	100	6.94399	2423.98	0	1	0	0
10106029	NA	NA	NA	NA	NA	NA	NA	NA	NA	0	2	0	0	1	669	0.0531144	8	100	7.40145	2423.98	0	0	1	0
10106030	NA	NA	NA	NA	NA	NA	NA	NA	NA	0	0	0	0	1	269	0.0147292	7	100	0.535712	2423.98	0	1	0	0
10106033	NA	NA	NA	NA	NA	NA	NA	NA	NA	0	0	0	0	1	1400	0.101881	5	100	30.7095	4062.12	0	0	0	1
10107001	NA	NA	NA	NA	NA	NA	NA	NA	NA	0	1	0	0	1	173	0.0149743	8	70	4.48741	2427.68	0	0	1	0
10107002	NA	NA	NA	NA	NA	NA	NA	NA	NA	0	0	0	0	1	1220	0.167046	8	100	106.999	2709.12	0	1	0	0
10107003	NA	NA	NA	NA	NA	NA	NA	NA	NA	0	0	0	0	1	1196	0.183841	6	100	4.18607	2856.98	0	1	0	0
10107004	NA	NA	NA	NA	NA	NA	NA	NA	NA	0	0	0	0	1	1095	0.0941823	6	100	14.5983	2903.63	0	1	0	0
10107005	NA	NA	NA	NA	NA	NA	NA	NA	NA	0	0	0	0	1	1083	0.09902	6	100	5.51736	2904.17	1	0	0	0
10107006	NA	NA	NA	NA	NA	NA	NA	NA	NA	0	0	0	0	1	1110	0.0755611	6	100	29.9829	2904.04	0	0	1	0
10107007	NA	NA	NA	NA	NA	NA	NA	NA	NA	0	0	0	0	1	505	0.0214122	20	95	84.8318	2742.32	0	0	1	0
10107008	NA	NA	NA	NA	NA	NA	NA	NA	NA	0	0	0	0	1	829	0.0449335	10	100	27.8667	2760.65	0	0	1	0
10107009	NA	NA	NA	NA	NA	NA	NA	NA	NA	0	0	0	0	1	1160	0.143766	6	100	7.33804	2852.41	0	0	1	0
10107010	NA	NA	NA	NA	NA	NA	NA	NA	NA	0	1	0	0	1	1105	0.116392	8	100	9.54556	2457.21	0	0	0	1
10107011	NA	NA	NA	NA	NA	NA	NA	NA	NA	0	0	0	0	1	1104	0.0421932	8	55	18.8974	2629.65	0	0	0	1
10107012	NA	NA	NA	NA	NA	NA	NA	NA	NA	0	0	0	0	1	700	0.0418021	10	55	28.9572	2568.76	0	0	0	1
10107013	NA	NA	NA	NA	NA	NA	NA	NA	NA	2	0	0	0	1	327	0.0205813	40	80	161.74	2656.39	0	0	0	1
10107014	NA	NA	NA	NA	NA	NA	NA	NA	NA	0	0	0	0	1	1189	0.0473133	8	55	17.7705	2572.93	0	0	0	1
10107015	NA	NA	NA	NA	NA	NA	NA	NA	NA	0	0	0	0	1	688	0.0565041	10	55	48.7138	2565.56	0	0	0	1
10107016	NA	NA	NA	NA	NA	NA	NA	NA	NA	0	0	0	0	1	581	0.0616206	6	90	12.366	2453.69	0	0	0	1
10107017	NA	NA	NA	NA	NA	NA	NA	NA	NA	0	0	0	0	1	206	0.00359281	50	90	725.973	3435.7	0	0	1	0
10107018	1	NA	1	NA	1	NA	NA	1	1	4	1	0	0	1	200	0.00786726	20	80	774.17	3374.28	0	0	1	0
10107019	NA	NA	NA	NA	NA	NA	NA	NA	NA	0	0	0	0	1	145	0.00482858	85	90	952.344	3235.96	0	1	0	0
10107020	NA	NA	NA	NA	NA	NA	NA	NA	NA	0	1	0	0	1	505	0.0564857	8	95	947.17	3240.39	0	0	1	0
10107021	NA	NA	NA	NA	NA	NA	NA	NA	NA	0	3	0	0	1	164	0.00500259	8	95	973.347	3218.48	1	0	0	0
10107034	NA	NA	NA	NA	NA	NA	NA	NA	NA	0	0	0	0	1	750	0.0305361	15	100	88.6068	4457.05	0	0	0	1
10108001	NA	NA	NA	NA	NA	NA	NA	NA	NA	0	0	0	0	1	146	0.00628931	122	72.5	1371.95	4375.22	0	0	0	1
10108002	NA	NA	NA	NA	NA	NA	NA	NA	NA	0	1	0	0	1	309	0.0397241	7	65	13.29	3935.69	1	0	0	0
10108003	NA	NA	NA	NA	NA	NA	NA	NA	NA	0	0	0	0	1	857	0.107874	7	85	6.55986	2899.4	0	0	0	1
10108004	NA	NA	NA	NA	NA	NA	NA	NA	NA	0	0	0	0	1	1005	0.119276	9	100	14.9841	2902.03	0	0	0	1
10108005	NA	NA	NA	NA	NA	NA	NA	NA	NA	0	0	0	0	1	1393	0.161172	9	100	7.98559	2904.43	1	0	0	0
10108006	NA	NA	NA	NA	NA	NA	NA	NA	NA	1	0	0	0	1	346	0.0121663	13	80	38.8806	2962.72	0	0	0	1
10108007	NA	NA	NA	NA	NA	NA	NA	NA	NA	2	0	0	0	1	274	0.0179718	15	80	57.2182	3229.13	0	0	0	1
10108008	NA	NA	NA	NA	NA	NA	NA	NA	NA	0	0	0	0	1	1368	0.10372	9	100	18.4231	2904.43	0	0	0	1
10108009	NA	NA	NA	NA	NA	NA	NA	NA	NA	0	0	0	0	1	1288	0.443503	7	100	7.17885	2904.43	0	0	0	1
10108010	NA	NA	NA	NA	NA	NA	NA	NA	NA	0	0	0	0	1	1216	0.431373	8	100	8.28968	2904.43	0	0	0	1
10108011	NA	NA	NA	NA	NA	NA	NA	NA	NA	0	0	0	0	1	1011	0.261905	8	100	1.06288	2904.43	0	0	0	1
10108012	NA	NA	NA	NA	NA	NA	NA	NA	NA	0	0	0	0	1	526	0.0415047	17	100	43.8518	3143.29	0	0	0	1
10108013	NA	NA	NA	NA	NA	NA	NA	NA	NA	0	0	0	0	1	1104	0.133503	8	100	6.76989	2903.31	0	0	1	0
10108014	NA	NA	NA	NA	NA	NA	NA	NA	NA	0	0	0	0	1	1354	0.298422	8	90	35.1544	2951.4	0	0	0	1
10108015	NA	NA	NA	NA	NA	NA	NA	NA	NA	0	1	0	0	1	536	0.103687	8	85	43.0315	3128.99	1	0	0	0
10108016	NA	NA	NA	NA	NA	NA	NA	NA	NA	0	0	0	0	1	1423	0.18343	9	100	11.0947	3683.1	0	1	0	0
10108017	NA	NA	NA	NA	NA	NA	NA	NA	NA	0	0	0	0	1	1144	0.21742	8	100	7.76121	3675.33	0	1	0	0
10108018	NA	NA	NA	NA	NA	NA	NA	NA	NA	0	0	0	0	1	1372	0.147746	9	100	11.4835	2934.66	1	0	0	0
10108019	NA	NA	NA	NA	NA	NA	NA	NA	NA	0	0	0	0	1	1147	0.162403	8	100	15.2114	2925.84	1	0	0	0
10108020	NA	NA	NA	NA	NA	NA	NA	NA	NA	0	0	0	0	1	582	0.0936907	11	100	23.5432	2957.12	1	0	0	0
10108021	NA	NA	NA	NA	NA	NA	NA	NA	NA	0	0	0	0	1	1252	0.293946	8	90	2.84287	2816.46	1	0	0	0
10108022	NA	NA	NA	NA	NA	NA	NA	NA	NA	0	0	0	0	1	993	0.324151	8	90	8.66323	2639.37	0	1	0	0
10108023	NA	NA	NA	NA	NA	NA	NA	NA	NA	0	0	0	0	1	1245	0.328	8	90	1.84923	2844.76	0	1	0	0
10108024	NA	NA	NA	NA	NA	NA	NA	NA	NA	0	0	0	0	1	251	0.0761085	8	80	3.97349	2442.31	0	1	0	0
10108025	NA	NA	NA	NA	NA	NA	NA	NA	NA	0	0	0	0	1	135	0.00073046	30	80	952.811	3235.56	0	1	0	0
10108026	NA	NA	NA	NA	NA	NA	NA	NA	NA	0	0	0	0	1	237	0.0310779	7	100	8.20852	2423.98	0	1	0	0
10108027	NA	NA	NA	NA	NA	NA	NA	NA	NA	0	0	0	0	1	229	0.0152362	7	95	9.51008	2423.98	0	0	1	0
10108028	NA	NA	NA	NA	NA	NA	NA	NA	NA	0	1	0	0	1	266	0.0200542	7	85	9.39641	2423.98	1	0	0	0
10108029	NA	NA	NA	NA	NA	NA	NA	NA	NA	0	0	0	0	1	265	0.0169551	7	90	6.87389	2423.98	1	0	0	0
10108030	NA	NA	NA	NA	NA	NA	NA	NA	NA	0	0	0	0	1	248	0.0360592	7	90	9.39641	2423.98	0	0	1	0
10108031	NA	NA	NA	NA	NA	NA	NA	NA	NA	0	0	1	0	0	192	0.0417266	7	85	18.2355	2423.98	1	0	0	0
10108032	NA	NA	NA	NA	1	NA	NA	NA	NA	0	1	0	0	1	265	0.0213043	8	67.5	8.14869	2423.98	0	0	1	0
10108033	NA	NA	NA	NA	NA	NA	NA	NA	NA	0	1	0	0	1	266	0.0284634	8	90	4.84467	2685.45	0	1	0	0
10108034	NA	NA	NA	NA	NA	NA	NA	NA	NA	0	0	0	0	1	308	0.0215451	8	75	13.53	2525.93	0	0	1	0
10108035	NA	NA	NA	NA	NA	NA	NA	NA	NA	0	0	0	0	1	278	0.0355705	8	80	12.4218	2501.48	0	0	1	0
10108036	NA	NA	NA	NA	NA	NA	NA	NA	NA	0	0	0	0	1	280	0.0182253	8	82.5	9.92862	2472.51	0	0	1	0
10108037	NA	NA	NA	NA	NA	NA	NA	NA	NA	0	0	0	0	1	274	0.0940111	8	55	1.39399	2803.55	0	0	1	0
10108039	NA	NA	NA	NA	NA	NA	NA	NA	NA	0	1	0	0	1	215	0.0521042	8	50	5.2376	2799.45	1	0	0	0
10108040	NA	NA	NA	NA	NA	NA	NA	NA	NA	0	0	0	0	1	720	0.264276	8	67.5	1.54357	3882.1	0	0	1	0
10108041	NA	NA	NA	NA	NA	NA	NA	NA	NA	0	0	0	0	1	1163	0.0936474	8	100	22.1035	3957.46	1	0	0	0
10108042	NA	NA	NA	NA	NA	NA	NA	NA	NA	0	0	0	0	1	364	0.0595903	13	70	29.0563	3949.49	0	0	1	0
10108043	NA	NA	NA	NA	NA	NA	NA	NA	NA	0	0	0	0	1	994	0.266957	8	100	2.3415	3930.54	1	0	0	0
10108044	NA	NA	NA	NA	NA	NA	NA	NA	NA	0	0	0	0	1	831	0.359457	8	100	1.93696	3945.15	0	0	1	0
10108045	NA	NA	NA	NA	NA	NA	NA	NA	NA	0	0	0	0	1	1058	0.311126	8	100	2.48208	3947.52	0	0	1	0
10108046	NA	NA	NA	NA	NA	NA	NA	NA	NA	0	0	0	0	1	1008	0.226895	8	100	5.67161	3949.07	0	0	0	1
10108047	NA	NA	NA	NA	NA	NA	NA	NA	NA	0	0	0	0	1	791	0.123879	9	100	9.90881	4259.44	1	0	0	0
10108048	NA	NA	NA	NA	NA	NA	NA	NA	NA	0	0	0	0	1	1090	0.226981	8	100	5.82702	4733.26	1	0	0	0
10108049	NA	NA	NA	NA	NA	NA	NA	NA	NA	0	0	0	0	1	1146	0.145321	9	100	17.8582	4826.41	0	1	0	0
10108050	NA	NA	NA	NA	NA	NA	NA	NA	NA	0	0	0	0	1	1073	0.124007	9	80	21.6285	4726.25	0	1	0	0
10110001	NA	NA	NA	NA	NA	NA	NA	NA	NA	0	0	0	0	1	1650	0.144059	5	100	26.4	4015.31	0	1	0	0
10110002	NA	NA	NA	NA	NA	NA	NA	NA	NA	0	0	0	0	1	1750	0.167614	20	100	16.9825	4611.74	0	0	1	0
10110003	NA	NA	NA	NA	NA	NA	NA	NA	NA	0	0	0	0	1	1415	0.0964361	20	100	30.2144	4826.86	0	0	0	1
10110004	NA	1	NA	NA	NA	NA	NA	NA	NA	0	0	0	0	1	495	0.0700935	26.6667	80	38.1101	4852.39	0	0	0	1
10110005	NA	NA	NA	NA	NA	NA	NA	NA	NA	0	0	0	0	1	1150	0.128988	8	100	24.5695	4950.38	0	0	0	1
10110006	NA	NA	NA	NA	NA	NA	NA	NA	NA	0	0	0	0	1	1290	0.114829	8	100	23.9641	4950.38	0	0	1	0
10110007	NA	NA	NA	NA	NA	NA	NA	NA	NA	0	1	0	1	0	140	0.00115714	116.333	80	2917.85	3801.39	0	1	0	0
10110008	NA	NA	NA	NA	NA	NA	NA	NA	NA	0	0	0	0	1	275	0.0611354	10	100	2917.85	3801.39	0	1	0	0
10110009	NA	NA	NA	NA	NA	NA	NA	NA	NA	0	0	0	0	1	830	0.151826	6	80	36.7121	4848.68	0	0	0	1
10110010	1	1	NA	NA	NA	NA	NA	1	1	0	0	0	0	1	1200	0.188153	6	60	5.66486	4950.38	0	0	1	0
10110011	NA	NA	NA	NA	NA	NA	NA	NA	NA	0	0	0	0	1	416	0.119527	10	100	30.111	4950.38	0	0	1	0
10110012	NA	NA	NA	NA	NA	NA	NA	NA	NA	0	0	0	1	0	200	0.0400922	40	100	25.6933	4950.38	0	0	1	0
10110013	NA	NA	NA	NA	NA	NA	NA	NA	NA	0	0	0	0	1	990	0.339286	5	100	2866.55	3791.36	1	0	0	0
10110014	1	NA	NA	NA	NA	1	NA	1	1	0	0	0	0	1	135	0.00384615	100	100	3030.18	3843.22	0	1	0	0
10111001	NA	NA	NA	NA	NA	NA	NA	1	NA	0	1	0	0	1	248	0.0285655	6	100	15.2607	2478.67	0	0	1	0
10111002	NA	NA	NA	NA	NA	NA	NA	NA	NA	0	1	0	0	1	716	0.217438	6	90	2.66674	2862.08	0	0	1	0
10111003	NA	NA	NA	NA	NA	NA	NA	NA	NA	0	1	0	1	0	290	0.0668896	6	90	5.20016	3406.37	0	0	1	0
10111004	NA	NA	NA	NA	NA	NA	NA	NA	NA	0	0	0	0	1	1144	0.337467	6	100	1.98063	3903	0	0	1	0
10111005	NA	NA	NA	NA	NA	NA	NA	NA	NA	0	0	0	0	1	1140	0.307279	6	100	3142.25	3881.54	0	0	1	0
10111006	NA	NA	NA	NA	NA	NA	NA	NA	NA	0	0	0	0	1	886	0.181097	6	100	3119.71	3875.03	0	0	1	0
10111007	1	1	NA	NA	NA	NA	NA	1	1	0	0	0	0	1	1102	0.208886	6	100	9.53809	4950.1	0	0	1	0
10111008	NA	NA	NA	NA	NA	NA	NA	NA	NA	0	0	0	0	1	933	0.15962	8	100	10.0173	4950.34	0	0	1	0
10111009	NA	NA	NA	NA	NA	NA	NA	NA	NA	0	0	0	0	1	1210	0.217951	8	100	5.32414	4950.36	0	0	1	0
10111010	NA	NA	NA	NA	NA	NA	NA	NA	NA	0	0	0	0	1	1090	0.297511	6	95	2.2916	4950.38	0	1	0	0
10111011	NA	NA	NA	NA	NA	NA	NA	NA	NA	0	0	0	0	1	1170	0.267744	8	100	4.86266	4951.28	0	1	0	0
10111012	NA	NA	NA	NA	NA	NA	NA	NA	NA	0	0	0	0	1	1355	0.341189	6	100	2.80847	4951.91	0	1	0	0
10111013	NA	NA	NA	NA	NA	NA	NA	NA	NA	0	0	0	0	1	1085	0.162962	8	100	11.7119	4198.91	1	0	0	0
10111014	NA	NA	NA	NA	NA	NA	NA	NA	NA	0	0	0	0	1	896	0.253303	6	95	3.47779	3927.95	1	0	0	0
10111015	NA	NA	NA	NA	NA	NA	NA	NA	NA	0	0	0	0	1	997	0.368815	6	95	2.07741	3903	1	0	0	0
10111016	NA	NA	NA	NA	NA	NA	NA	NA	NA	0	0	0	0	1	761	0.147653	6	100	6.4379	2803.55	0	0	1	0
10112001	1	1	1	NA	1	1	NA	1	1	0	0	0	0	1	123	0.0023116	60	90	3484.43	3801.43	0	0	1	0
10112002	NA	NA	NA	NA	NA	NA	NA	NA	NA	0	0	0	0	1	242	0.0178765	8	100	2.03157	2423.98	0	0	1	0
10112003	NA	NA	NA	NA	NA	NA	NA	NA	NA	0	0	0	0	1	489	0.0362357	9	90	102.02	2861.75	0	0	1	0
10112004	NA	NA	NA	NA	NA	NA	NA	NA	NA	0	0	0	0	1	659	0.0868519	8	90	4.42329	2423.98	1	0	0	0
10112005	NA	NA	NA	NA	NA	NA	NA	NA	NA	0	1	0	0	1	676	0.101983	8	90	1.90076	2423.98	1	0	0	0
10112006	NA	NA	NA	NA	NA	NA	NA	NA	NA	0	0	0	1	0	972	0.104056	8	100	9.76308	2800.91	0	0	1	0
10112007	NA	NA	NA	NA	NA	NA	NA	NA	NA	0	0	0	0	1	346	0.0150565	10	90	56.7051	3199.9	1	0	0	0
10112008	NA	NA	NA	NA	NA	NA	NA	NA	NA	0	2	0	0	1	342	0.0115	8	90	2.51586	2624.65	1	0	0	0
10112009	NA	NA	NA	NA	NA	NA	NA	NA	NA	0	0	0	0	1	1091	0.147727	8	90	33.3995	3575.84	1	0	0	0
10112010	NA	NA	NA	NA	NA	NA	NA	NA	NA	0	0	0	0	1	895	0.0676419	8	100	25.1741	3763.45	1	0	0	0
10112011	NA	NA	NA	NA	NA	NA	NA	NA	NA	0	0	0	0	1	1045	0.0841049	8	100	24.3744	3790.7	0	0	0	1
10112012	NA	NA	NA	NA	NA	NA	NA	NA	NA	0	0	0	1	0	391	0.0137153	10	100	36.8413	3501.9	0	0	1	0
10112013	NA	NA	NA	NA	NA	NA	NA	NA	NA	0	0	0	0	1	311	0.00809797	15	100	61.3368	3141.41	1	0	0	0
10112014	NA	NA	NA	NA	NA	NA	NA	NA	NA	0	0	0	0	1	269	0.00674469	25	90	85.1737	2940.55	1	0	0	0
10112015	NA	NA	NA	NA	NA	NA	NA	NA	NA	0	0	0	0	1	411	0.0221467	8	90	85.1737	2940.55	1	0	0	0
10112016	NA	NA	NA	NA	NA	NA	NA	NA	NA	0	0	0	0	1	230	0.00511866	30	100	107.537	2839.3	1	0	0	0
10112017	NA	NA	NA	NA	NA	NA	NA	NA	NA	0	0	0	0	1	230	0.0176364	30	100	3484.42	3801.44	0	0	1	0
10112018	NA	NA	NA	NA	NA	NA	NA	NA	NA	0	1	0	0	1	252	0.0287443	6	85	4.04059	2423.98	0	0	1	0
10113001	NA	NA	NA	NA	NA	NA	NA	NA	NA	0	0	1	0	0	562	0.0586207	8	100	4.94814	1808.27	0	0	1	0
10113002	NA	NA	NA	NA	NA	NA	NA	NA	NA	0	0	0	0	1	226	0.00860157	10	85	42.8982	2076.75	0	0	1	0
10113003	NA	NA	NA	NA	NA	NA	NA	NA	NA	0	2	0	1	0	597	0.0594384	6	90	12.3574	2086.49	0	1	0	0
10113004	NA	NA	NA	NA	NA	NA	NA	NA	NA	0	1	0	0	1	260	0.037037	6	100	40.721	2090.48	0	1	0	0
10113005	NA	NA	NA	NA	NA	NA	NA	NA	NA	1	2	0	0	1	242	0.0317038	6	75	44.5794	1818.56	0	1	0	0
10113006	NA	NA	NA	NA	NA	NA	NA	NA	NA	0	4	0	0	1	441	0.0419169	8	70	44.5794	1818.56	0	1	0	0
10113007	NA	NA	NA	NA	NA	NA	NA	NA	NA	0	1	0	0	1	422	0.0324975	8	100	23.0094	1828.21	0	0	1	0
10113008	NA	NA	NA	NA	NA	NA	NA	NA	NA	0	0	0	0	1	124	0.00410483	10	70	54.3986	1816.7	0	0	1	0
10113009	NA	NA	NA	NA	NA	NA	NA	NA	NA	1	2	0	0	1	204	0.0136814	6	80	23.0094	1828.21	0	0	1	0
10113010	NA	NA	NA	NA	NA	NA	NA	NA	NA	1	2	0	0	1	150	0.00720059	6	50	4.78362	1808.27	0	0	1	0
10113011	NA	NA	NA	NA	NA	NA	NA	NA	NA	0	0	0	0	1	98	0.00746174	10	100	3751.61	3666.93	0	1	0	0
10113012	NA	NA	NA	NA	NA	NA	NA	NA	NA	0	5	0	0	1	183	0.0124791	8	50	3643.48	3719.2	1	0	0	0
10113013	1	1	1	NA	1	1	NA	1	1	0	0	0	0	1	146	0.00823635	100	80	3500.26	3792.96	0	0	1	0
10113014	NA	NA	1	NA	1	1	NA	1	1	0	0	0	0	1	88	0.00281911	138	100	3515.84	3784.08	0	0	1	0
10113015	NA	NA	NA	NA	NA	NA	NA	NA	NA	0	2	0	0	1	386	0.0233256	8	100	17.6682	1918.89	0	0	1	0
10113016	NA	NA	NA	NA	NA	NA	NA	NA	NA	0	0	0	0	1	192	0.0100623	10	100	85.6191	2020.59	0	0	1	0
10113017	NA	NA	NA	NA	NA	NA	NA	NA	NA	0	4	0	0	1	303	0.0352999	6	90	5.03828	1808.27	0	0	1	0
10113018	NA	NA	NA	NA	NA	NA	NA	NA	NA	0	3	0	0	1	371	0.0139015	10	75	24.4659	2423.98	1	0	0	0
10113019	NA	NA	NA	NA	NA	NA	NA	NA	NA	0	0	1	0	0	240	0.00537266	8	80	42.2033	2192.35	0	0	1	0
10113020	NA	NA	NA	NA	NA	NA	NA	NA	NA	0	0	0	0	1	431	0.0581948	8	90	10.2536	2423.98	1	0	0	0
10113021	NA	NA	NA	NA	NA	NA	NA	NA	NA	0	0	0	0	1	481	0.061967	8	90	18.0628	2423.98	1	0	0	0
10113022	NA	NA	NA	NA	NA	NA	NA	NA	NA	0	0	0	0	1	180	0.00954882	12	100	3602.7	3741.05	0	0	1	0
10113023	1	1	1	1	1	1	NA	1	1	0	0	0	0	1	100	0.00390482	100	95	3619.89	3731.78	0	0	1	0
10113024	1	NA	1	1	1	1	NA	1	1	0	0	0	0	1	72	0.00465839	150	70	4669.6	3504.39	0	0	1	0
10114001	NA	NA	NA	NA	NA	NA	NA	NA	NA	0	0	0	0	1	680	0.0228833	25	100	66.4438	4918.31	0	0	1	0
10114002	NA	NA	NA	NA	NA	NA	NA	NA	NA	0	0	0	0	1	480	0.0212876	25	100	119.415	4438.11	0	0	0	1
10114003	NA	NA	NA	NA	NA	NA	NA	NA	NA	0	0	0	1	0	275	0.0103984	39.6667	100	139.667	4212.35	0	0	1	0
10114004	NA	NA	NA	NA	NA	NA	NA	NA	NA	0	0	0	0	1	1160	0.146279	5	100	110.046	4555.19	0	0	1	0
10114005	NA	NA	NA	NA	NA	NA	NA	NA	NA	0	0	0	0	1	695	0.028169	15	100	55.0325	4094.81	0	0	1	0
10114006	NA	NA	NA	NA	NA	NA	NA	NA	NA	0	0	0	0	1	435	0.0228908	25	100	81.5534	3688.35	0	0	1	0
10114007	NA	NA	NA	NA	NA	NA	NA	NA	NA	1	0	0	0	1	260	0.0120824	35.6667	95	95.0148	3520.41	0	0	1	0
10114008	NA	NA	NA	NA	NA	NA	NA	NA	NA	0	0	0	0	1	1140	0.163993	5	100	13.2059	4950.38	0	0	1	0
10114009	NA	NA	NA	NA	NA	NA	NA	NA	NA	0	0	0	0	1	1100	0.130435	5	100	6.71035	4950.38	0	0	1	0
10114010	NA	NA	NA	NA	NA	NA	NA	NA	NA	0	0	0	0	1	990	0.0995025	5	100	34.2222	4950.38	0	0	1	0
10114011	NA	NA	NA	NA	NA	NA	NA	NA	NA	0	0	0	0	1	1268	0.13338	5	100	62.1859	4930.79	0	0	1	0
10114012	NA	NA	NA	NA	NA	NA	NA	NA	NA	0	0	0	0	1	1120	0.166197	5	100	3.83115	4950.38	0	0	0	1
10114013	NA	NA	NA	NA	NA	NA	NA	NA	NA	0	0	0	0	1	1070	0.140271	5	100	77.6357	4813.81	0	0	1	0
10114014	NA	NA	NA	NA	NA	NA	NA	NA	NA	0	0	0	0	1	1270	0.253205	5	100	69.7768	4881.7	0	0	1	0
10114015	NA	NA	NA	NA	NA	NA	NA	NA	NA	0	0	0	0	1	965	0.230612	5	100	86.8183	4722.86	0	0	1	0
10114016	NA	NA	NA	NA	NA	NA	NA	NA	NA	0	0	0	0	1	1010	0.251726	5	100	89.7771	4697.03	0	0	1	0
10114017	NA	NA	NA	NA	NA	NA	NA	NA	NA	0	0	0	0	1	910	0.314516	5	100	97.1243	4639.45	0	0	1	0
10114018	NA	NA	NA	NA	NA	NA	NA	NA	NA	0	0	0	0	1	815	0.233032	5	100	113.617	4511.79	0	0	1	0
10114019	NA	NA	NA	NA	NA	NA	NA	NA	NA	0	0	0	0	1	700	0.222222	5	100	123.924	4380.94	0	0	1	0
10114020	NA	NA	NA	NA	NA	NA	NA	NA	NA	0	0	0	1	0	560	0.153846	5	100	130.965	4300.5	0	0	1	0
10114021	NA	NA	NA	NA	NA	NA	NA	NA	NA	0	0	0	1	0	570	0.177083	5	100	133.025	4278.42	0	0	1	0
10114022	NA	NA	NA	NA	NA	NA	NA	NA	NA	0	3	1	0	0	465	0.16	5	100	0.747765	2883.38	0	0	1	0
10114023	NA	NA	NA	NA	NA	NA	NA	NA	NA	0	1	0	1	0	420	0.171429	5	100	140.611	4203.25	0	0	1	0
10114024	NA	NA	NA	NA	NA	NA	NA	NA	NA	0	1	0	0	1	520	0.203704	5	100	143.906	4173.1	0	0	1	0
10114025	NA	NA	NA	NA	NA	NA	NA	NA	NA	0	1	0	0	1	465	0.229167	5	100	146.206	4152.66	0	0	1	0
10114026	NA	NA	NA	NA	NA	NA	NA	NA	NA	0	0	0	0	1	715	0.121011	5	100	81.5534	3688.35	0	0	1	0
10114027	NA	NA	NA	NA	NA	NA	NA	NA	NA	0	0	0	0	1	1100	0.240103	5	100	52.6266	4146.22	0	0	1	0
10114028	NA	NA	NA	NA	NA	NA	NA	NA	NA	0	0	0	0	1	1065	0.0838109	5	100	49.4493	4198.63	0	0	1	0
10114029	NA	NA	NA	NA	NA	NA	NA	NA	NA	0	0	0	0	1	1160	0.072093	5	100	19.5409	4702.36	0	0	1	0
10114030	NA	NA	NA	NA	NA	NA	NA	NA	NA	1	0	1	0	0	204	0.0102102	48.3333	95	243.143	3892.07	0	0	1	0
10115001	NA	NA	NA	NA	NA	NA	NA	NA	NA	0	0	0	0	1	640	0.0551044	5	100	12.0807	2301.53	0	0	1	0
10115002	NA	NA	NA	NA	NA	NA	NA	NA	NA	0	3	1	0	0	680	0.0674274	5	100	12.0807	2301.53	0	0	1	0
10115003	NA	NA	NA	NA	NA	NA	NA	NA	NA	0	0	1	0	0	355	0.0236136	6	100	20.9219	2301.53	0	0	1	0
10115004	NA	NA	NA	NA	NA	NA	NA	NA	NA	0	1	1	0	0	400	0.0539033	6	100	20.9219	2301.53	0	0	1	0
10115005	NA	NA	NA	NA	NA	NA	NA	NA	NA	0	0	1	0	0	223	0.00450857	6	100	60.4283	2248.89	0	0	1	0
10115006	NA	NA	NA	NA	NA	NA	NA	NA	NA	0	0	1	0	0	370	0.0272232	6	100	28.9685	2301.53	0	0	1	0
10115007	NA	NA	NA	NA	NA	NA	NA	NA	NA	0	0	1	0	0	198	0.00174825	12	100	74.6117	2236.7	0	1	0	0
10115008	NA	NA	NA	NA	NA	NA	NA	NA	NA	0	1	1	0	0	340	0.0135266	6	100	13.959	2080.09	0	1	0	0
10115009	NA	NA	NA	NA	NA	NA	NA	NA	NA	0	2	1	0	0	278	0.010352	5	30	4.89195	1952.97	0	1	0	0
10115010	NA	NA	NA	NA	NA	NA	NA	NA	NA	0	0	0	1	0	228	0.00475436	6	70	60.4283	2248.89	0	1	0	0
10115011	NA	NA	NA	NA	NA	NA	NA	NA	NA	0	0	1	0	0	188	0.00784844	12	95	202.389	2059.18	0	0	1	0
10115012	NA	NA	NA	NA	NA	NA	NA	NA	NA	0	1	1	0	0	350	0.011523	5	100	10.9801	1981.95	0	1	0	0
10115013	NA	NA	NA	NA	NA	NA	NA	NA	NA	0	0	1	0	0	235	0.00675676	6	85	34.8011	1962.14	0	1	0	0
10115014	NA	NA	NA	NA	NA	NA	NA	NA	NA	0	0	1	0	0	170	0.00673854	6	60	119.211	1955.65	0	0	1	0
10115015	NA	NA	NA	NA	NA	NA	NA	NA	NA	0	1	1	0	0	278	0.00793478	5	100	18.2074	1952.97	0	1	0	0
10115016	NA	NA	NA	NA	NA	NA	NA	NA	NA	0	0	1	0	0	254	0.0125	5	100	18.347	1952.97	0	1	0	0
10115017	NA	NA	NA	NA	NA	NA	NA	NA	NA	0	2	1	0	0	228	0.00847201	5	50	23.3601	1952.97	0	1	0	0
10115018	NA	NA	NA	NA	NA	NA	NA	NA	NA	0	0	1	0	0	200	0.00594796	5	85	32.0467	1952.97	0	1	0	0
10115019	NA	NA	NA	NA	NA	NA	NA	NA	NA	0	0	1	0	0	176	0.00449944	8	100	72.93	1952.97	0	1	0	0
10115020	NA	NA	NA	NA	NA	NA	NA	NA	NA	0	0	1	0	0	173	0.00244716	5	80	13.5104	1952.97	0	1	0	0
10115021	NA	NA	NA	NA	NA	NA	NA	NA	NA	0	0	0	1	0	166	0.00201613	6	90	32.0069	1952.97	0	1	0	0
10115022	NA	NA	NA	NA	NA	NA	NA	NA	NA	1	0	1	0	0	156	0.00661578	12	100	120.099	1955.63	0	1	0	0
10115023	NA	NA	NA	NA	NA	NA	NA	NA	NA	1	0	1	0	0	130	0.00655412	31.3333	100	209.421	2056.34	0	1	0	0
10115024	NA	NA	NA	NA	NA	NA	NA	NA	NA	2	0	1	0	0	97	0.00533643	40.3333	90	739.049	2968.66	0	1	0	0
10116001	NA	NA	NA	NA	NA	NA	NA	NA	NA	0	3	0	0	1	192	0.014186	5	72.5	6.84438	2115.91	0	1	0	0
10116002	NA	NA	NA	NA	NA	NA	NA	NA	NA	0	1	0	0	1	224	0.0264205	5	80	6.84438	2115.91	0	1	0	0
10116003	NA	NA	NA	NA	NA	NA	NA	NA	NA	0	1	0	1	0	131	0.0165192	6	70	518.926	3355.49	0	1	0	0
10116004	NA	NA	NA	NA	NA	NA	NA	NA	NA	0	1	0	0	1	222	0.0176014	5	77.5	8.38373	2294.13	0	1	0	0
10116005	NA	NA	NA	NA	NA	NA	NA	NA	NA	0	2	0	0	1	270	0.0174235	5	85	11.7393	2301.53	0	1	0	0
10116006	NA	NA	NA	NA	NA	NA	NA	NA	NA	0	1	0	0	1	272	0.0238806	5	90	5.6866	2301.53	0	0	1	0
10116007	NA	NA	NA	NA	NA	NA	NA	NA	NA	0	0	0	0	1	176	0.0141593	6	87.5	25.6296	2299.11	0	1	0	0
10116008	NA	NA	NA	NA	NA	NA	NA	NA	NA	0	1	0	0	1	120	0.0105263	8	80	508.758	3379.02	0	1	0	0
10116009	NA	NA	NA	NA	NA	NA	NA	NA	NA	0	2	0	0	1	316	0.0302033	5	87.5	6.7118	2301.53	0	0	1	0
10116010	NA	NA	NA	NA	NA	NA	NA	NA	NA	0	2	0	0	1	160	0.0158095	6	75	479.592	3444.72	0	0	1	0
10116011	NA	NA	NA	NA	NA	NA	NA	NA	NA	0	0	0	1	0	273	0.0629526	5	75	6.7118	2301.53	0	0	1	0
10116012	NA	NA	NA	NA	NA	NA	NA	NA	NA	0	0	0	0	1	225	0.032	5	85	5.23063	2289.72	0	1	0	0
10116013	NA	NA	NA	NA	NA	NA	NA	NA	NA	0	1	0	0	1	140	0.0215348	5	85	466.754	3476.1	0	1	0	0
10116014	NA	NA	NA	NA	NA	NA	NA	NA	NA	0	1	0	0	1	147	0.0216985	5	85	463.93	3483.19	0	1	0	0
10116015	NA	NA	NA	NA	NA	NA	NA	NA	NA	0	1	0	0	1	165	0.0226081	5	85	459.504	3494.63	0	1	0	0
10116016	NA	NA	NA	NA	NA	NA	NA	NA	NA	0	0	0	0	1	347	0.0309618	5	85	4.11539	2301.53	0	0	1	0
10116017	NA	NA	NA	NA	NA	NA	NA	NA	NA	0	0	0	0	1	286	0.0328119	5	90	6.25744	2301.53	0	0	1	0
10116018	NA	NA	NA	NA	NA	NA	NA	NA	NA	0	0	0	0	1	208	0.0235955	12	55	456.189	3503.33	0	1	0	0
10116019	NA	NA	NA	NA	NA	NA	NA	NA	NA	0	1	0	0	1	213	0.0308162	12	90	456.189	3503.33	0	1	0	0
10116020	NA	NA	NA	NA	NA	NA	NA	NA	NA	0	0	0	0	1	102	0.00531915	8	87.5	462.704	3486.19	0	1	0	0
10116021	NA	NA	NA	NA	NA	NA	NA	NA	NA	0	0	0	0	1	1212	0.0701073	8	100	27.9949	4416.16	0	0	1	0
10116023	NA	NA	NA	NA	NA	NA	NA	NA	NA	0	0	0	0	1	1134	0.178323	8	100	12.2617	4864.53	0	0	1	0
10116024	NA	NA	NA	NA	NA	NA	NA	NA	NA	0	0	0	0	1	1048	0.283604	8	100	15.4194	4764.4	0	0	1	0
10116025	NA	NA	NA	NA	NA	NA	NA	NA	NA	0	0	0	0	1	955	0.155603	8	100	18.6576	4645.69	0	0	1	0
10116026	NA	NA	NA	NA	NA	NA	NA	NA	NA	0	0	0	0	1	1131	0.190944	8	100	22.7222	4530.99	0	0	1	0
10116027	NA	NA	NA	NA	NA	NA	NA	NA	NA	0	0	0	0	1	1121	0.221514	10	100	3.67007	3910.08	0	0	1	0
10116028	NA	NA	NA	NA	NA	NA	NA	NA	NA	0	0	0	0	1	531	0.0217434	10	100	52.6469	3979.09	0	0	1	0
10116029	NA	NA	NA	NA	NA	NA	NA	NA	NA	0	0	0	0	1	1163	0.148965	10	100	33.0007	4343.89	0	0	1	0
10116030	NA	NA	NA	NA	NA	NA	NA	NA	NA	0	0	0	0	1	617	0.0410175	11	100	43.6844	4123.35	0	0	1	0
10116031	NA	NA	NA	NA	NA	NA	NA	NA	NA	0	0	0	0	1	928	0.223665	8	100	48.8777	4053.25	0	0	1	0
10116032	NA	NA	NA	NA	NA	NA	NA	NA	NA	0	0	0	0	1	1117	0.154395	12	100	57.8918	3955.21	0	0	1	0
10116033	NA	NA	NA	NA	NA	NA	NA	NA	NA	0	0	0	0	1	416	0.0262522	15	75	80.4691	3703.46	0	0	1	0
10116034	NA	NA	NA	NA	NA	NA	NA	NA	NA	0	0	0	0	1	1137	0.17214	12	100	69.0395	3839	0	0	1	0
10116035	NA	NA	NA	NA	NA	NA	NA	NA	NA	0	0	0	0	1	863	0.190794	12	100	75.0123	3762.77	0	0	1	0
10116036	NA	NA	NA	NA	NA	NA	NA	NA	NA	0	0	0	0	1	868	0.108025	10	75	5.60581	2883.38	0	0	1	0
10116037	NA	NA	NA	NA	NA	NA	NA	NA	NA	0	0	1	0	0	318	0.0193125	10	62.5	95.2529	3565.38	0	0	1	0
10116038	NA	NA	NA	NA	NA	NA	NA	NA	NA	0	2	1	0	0	784	0.19519	10	75	3.07982	2883.38	0	0	1	0
10116039	NA	NA	NA	NA	NA	NA	NA	NA	NA	0	1	0	0	1	497	0.0671253	12	85	99.1504	3521.77	0	0	1	0
10116040	NA	NA	NA	NA	NA	NA	NA	NA	NA	0	0	1	0	0	173	0.00859711	15	75	160.54	3295.82	0	0	1	0
10116041	NA	NA	NA	NA	NA	NA	NA	NA	NA	0	1	1	0	0	760	0.0884403	19	80	7.7887	2650.04	0	0	1	0
10116042	NA	NA	NA	NA	NA	NA	NA	NA	NA	0	0	0	0	1	901	0.0717794	12	100	16.5036	3533.61	0	0	1	0
10116043	NA	NA	NA	NA	NA	NA	NA	NA	NA	0	0	0	0	1	834	0.172437	10	100	3.83562	2883.38	0	0	1	0
10116044	NA	NA	NA	NA	NA	NA	NA	NA	NA	0	0	0	0	1	426	0.0269827	10	80	38.3302	3163.27	0	0	1	0
10116045	NA	NA	NA	NA	NA	NA	NA	NA	NA	0	0	0	0	1	814	0.142321	10	100	38.3302	3163.27	0	0	1	0
10116046	NA	NA	NA	NA	NA	NA	NA	NA	NA	0	1	1	0	0	243	0.016118	8	70	48.0546	3049.49	0	1	0	0
10116047	NA	NA	NA	NA	NA	NA	NA	NA	NA	0	0	0	0	1	151	0.0127258	20	70	428.653	3580.42	0	1	0	0
10116048	NA	NA	NA	NA	NA	NA	NA	NA	NA	0	0	0	0	1	377	0.0831984	8	80	2.47474	2301.53	0	0	1	0
10116049	NA	NA	NA	NA	NA	NA	NA	NA	NA	0	1	0	0	1	107	0.00488998	8	90	441.849	3542.21	0	0	1	0
10116050	NA	NA	NA	NA	NA	NA	NA	NA	NA	0	1	0	1	0	460	0.0497752	8	85	263.753	3774.61	0	0	1	0
10116051	NA	NA	NA	NA	NA	NA	NA	NA	NA	0	3	1	0	0	537	0.0890474	8	90	250.26	3850.61	0	0	1	0
10116052	NA	NA	NA	NA	NA	NA	NA	NA	NA	0	0	0	0	1	167	0.00667959	40	67.5	255.337	3819.86	0	0	1	0
10116053	NA	NA	NA	NA	NA	NA	NA	NA	NA	2	0	0	0	1	143	0.00348356	40	65	428.653	3580.42	0	0	1	0
10116054	NA	NA	NA	NA	NA	NA	NA	NA	NA	1	0	0	0	1	124	0.00485088	70	67.5	440.116	3547.12	0	0	1	0
10116055	NA	NA	NA	1	NA	NA	NA	NA	NA	0	0	0	0	1	100	0.00434954	60	62.5	519.003	3355.32	0	1	0	0
10116056	NA	NA	NA	NA	NA	NA	NA	NA	NA	0	0	0	0	1	297	0.163498	8	60	0.765209	2301.53	0	1	0	0
10116057	NA	NA	NA	NA	NA	NA	NA	NA	NA	0	2	0	0	1	279	0.115846	6	55	1.37174	2301.53	0	1	0	0
10116058	NA	NA	NA	NA	NA	NA	NA	NA	NA	0	1	0	0	1	313	0.128967	6	87.5	0.713345	2301.53	0	0	1	0
10117001	NA	NA	NA	NA	NA	NA	NA	NA	NA	0	0	0	0	1	707	0.176208	6	90	5.94429	2877.16	0	0	1	0
10117002	NA	NA	NA	NA	NA	NA	NA	NA	NA	0	1	0	1	0	517	0.0546331	6	92.5	8.17386	2859.67	0	0	1	0
10117003	NA	NA	NA	NA	NA	NA	NA	NA	NA	0	0	0	0	1	313	0.01009	8	87.5	17.1986	2598.66	0	0	1	0
10117004	NA	NA	NA	NA	NA	NA	NA	NA	NA	0	0	0	0	1	273	0.00708038	6	95	17.1986	2598.66	0	0	1	0
10117005	NA	NA	NA	NA	NA	NA	NA	NA	NA	0	0	0	0	1	239	0.00758645	10	82.5	41.963	2481.99	0	0	1	0
10117006	NA	NA	NA	NA	NA	NA	NA	NA	NA	0	5	0	0	1	985	0.0934273	6	55	32.8615	2498.03	0	0	1	0
10117008	NA	NA	NA	NA	NA	NA	NA	NA	NA	0	0	0	0	1	622	0.0657205	6	72.5	4.58593	2423.98	0	0	1	0
10117009	NA	NA	NA	NA	NA	NA	NA	NA	NA	0	0	0	0	1	196	0.00459348	10	100	80.5635	2450.87	0	0	1	0
10117010	NA	NA	NA	NA	NA	NA	NA	NA	NA	0	0	0	0	1	339	0.0229416	6	90	5.37382	2391.58	0	0	1	0
10117011	NA	NA	NA	NA	NA	NA	NA	NA	NA	0	0	0	0	1	974	0.110523	6	70	4.42041	2423.98	0	0	1	0
10117012	NA	NA	NA	NA	NA	NA	NA	NA	NA	0	0	0	0	1	327	0.0205588	8	100	17.4816	2414.01	0	0	1	0
10117013	NA	NA	NA	NA	NA	NA	NA	NA	NA	0	0	0	0	1	249	0.0103093	10	90	35.5786	2419.08	0	0	1	0
10117014	NA	NA	NA	NA	NA	NA	NA	NA	NA	0	0	0	0	1	767	0.104032	6	100	3.43241	2423.98	0	1	0	0
10117015	NA	NA	NA	NA	NA	NA	NA	NA	NA	0	0	0	0	1	331	0.0371567	8	100	5.31433	2423.98	0	1	0	0
10117016	NA	NA	NA	NA	NA	NA	NA	NA	NA	0	0	0	0	1	561	0.199363	6	100	19.9115	2415.22	0	1	0	0
10117017	NA	NA	NA	NA	NA	NA	NA	NA	NA	0	1	0	0	1	377	0.0337327	5	100	33.5576	2418.78	0	0	1	0
10117018	NA	NA	NA	NA	NA	NA	NA	NA	NA	0	1	0	0	1	305	0.0149919	5	80	4.3252	2883.38	0	0	1	0
10117019	NA	NA	NA	NA	NA	NA	NA	NA	NA	0	0	0	0	1	297	0.011758	6	90	10.8157	2815.24	0	0	1	0
10117020	NA	NA	NA	NA	NA	NA	NA	NA	NA	1	0	0	0	1	256	0.00823469	8	90	28.2312	2499.94	0	0	1	0
10117021	NA	NA	NA	NA	NA	NA	NA	NA	NA	0	1	0	0	1	262	0.0138072	5	90	28.2312	2499.94	0	0	1	0
10117022	NA	NA	NA	NA	NA	NA	NA	NA	NA	0	0	0	0	1	208	0.00698233	8	90	120.563	2448.82	0	0	1	0
10117023	NA	NA	NA	NA	NA	NA	NA	NA	NA	0	0	0	0	1	186	0.00259538	15	80	120.63	2448.72	0	0	1	0
10117024	NA	NA	NA	NA	NA	NA	NA	NA	NA	0	0	0	0	1	176	0.00439147	15	95	128.578	2439.65	0	1	0	0
10117025	NA	NA	NA	NA	NA	NA	NA	NA	NA	0	0	0	0	1	247	0.0299595	5	90	1.57021	2301.53	0	0	1	0
10117026	NA	NA	NA	NA	NA	NA	NA	NA	NA	0	0	0	0	1	148	0.00437802	20	95	132.945	2435.13	0	1	0	0
10117027	NA	NA	NA	NA	NA	NA	NA	1	NA	0	0	0	0	1	119	0.00643345	25	90	881.693	2880.87	0	1	0	0
10117028	NA	NA	NA	NA	NA	NA	NA	NA	NA	0	3	0	0	1	200	0.0102368	6	80	140.41	2428.05	0	1	0	0
10117029	NA	NA	1	1	1	1	NA	1	1	0	0	0	0	1	74	0.00309454	110	80	4669.6	3504.39	0	1	0	0
10117030	NA	NA	NA	NA	NA	NA	NA	NA	NA	0	0	0	0	1	54	0.00266241	200	80	4669.6	3504.39	0	1	0	0
10117031	NA	NA	NA	NA	NA	NA	NA	NA	NA	0	1	0	0	1	134	0.0228677	6	90	2.03509	2260.37	0	1	0	0
10117032	NA	NA	NA	NA	NA	NA	NA	NA	NA	0	1	0	0	1	125	0.0135738	6	90	903.766	2862.58	0	1	0	0
10120001	NA	NA	NA	NA	NA	NA	NA	NA	NA	0	0	0	0	1	722	0.150588	7	100	5.64747	1808.27	0	1	0	0
10120002	NA	NA	NA	NA	NA	1	NA	NA	NA	0	0	0	0	1	582	0.143493	7	100	11.319	1811.07	0	1	0	0
10120003	NA	NA	NA	NA	NA	NA	NA	NA	NA	0	0	1	0	0	455	0.0982115	7	60	19.4912	1845.23	0	1	0	0
10120004	NA	NA	NA	NA	NA	NA	NA	NA	NA	0	0	1	0	0	210	0.0243995	8	90	29.8628	1858.02	0	1	0	0
10120005	NA	NA	NA	NA	NA	NA	NA	NA	NA	0	0	0	1	0	549	0.151968	7	90	23.2969	1840.63	0	1	0	0
10120006	NA	NA	NA	NA	NA	NA	NA	NA	NA	0	0	1	0	0	82	0.00545375	13	70	547.921	1945.63	0	1	0	0
10120007	NA	NA	NA	NA	NA	NA	NA	NA	NA	0	0	0	1	0	278	0.0827664	7	70	506.647	1950.63	0	1	0	0
10120008	NA	NA	NA	NA	NA	NA	NA	NA	NA	0	2	0	1	0	278	0.0451477	7	82.5	7.84484	1952.97	0	1	0	0
10120009	NA	NA	NA	NA	NA	NA	NA	NA	NA	0	0	0	0	1	603	0.0637116	9	75	17.2169	1952.56	0	1	0	0
10120010	NA	NA	NA	NA	NA	NA	NA	NA	NA	0	1	1	0	0	482	0.153339	7	80	3.72102	1952.97	0	1	0	0
10120011	NA	NA	NA	NA	NA	NA	NA	NA	NA	0	1	0	0	1	87	0.00416028	8	92.5	26.5268	1952.71	0	1	0	0
10120012	NA	NA	NA	NA	NA	NA	NA	NA	NA	0	1	0	0	1	141	0.0184066	7	70	25.7112	1952.7	0	1	0	0
10120013	NA	NA	NA	NA	NA	NA	NA	NA	NA	0	1	1	0	0	613	0.0735073	7	72.5	14.6841	1952.97	0	1	0	0
10120014	NA	NA	NA	NA	NA	NA	NA	NA	NA	0	0	0	0	1	75	0.0030349	7	90	20.5272	1952.97	0	1	0	0
10120015	NA	NA	NA	NA	NA	NA	NA	NA	NA	0	1	1	0	0	202	0.0380117	7	60	19.8986	1952.97	0	1	0	0
10120016	NA	NA	NA	NA	NA	NA	NA	NA	NA	0	2	1	0	0	590	0.0933405	7	60	62.7888	1940.05	0	1	0	0
10120017	NA	NA	NA	NA	NA	NA	NA	NA	NA	0	0	1	0	0	591	0.0779733	7	75	37.1243	1931.12	0	1	0	0
10120018	NA	NA	NA	NA	NA	NA	NA	NA	NA	0	1	0	1	0	132	0.00726169	7	80	37.1243	1931.12	0	1	0	0
10120019	NA	NA	NA	NA	NA	NA	NA	NA	NA	0	0	0	0	1	77	0.000535103	9	72.5	331.512	1949.41	0	1	0	0
10120020	NA	NA	NA	NA	NA	NA	NA	NA	NA	0	0	1	0	0	250	0.0219324	7	80	26.6821	1952.97	0	1	0	0
10120021	NA	NA	NA	NA	NA	NA	NA	NA	NA	0	0	0	1	0	199	0.0162861	7	90	20.9912	1952.97	0	1	0	0
10120022	NA	NA	NA	NA	NA	NA	NA	NA	NA	0	0	0	0	1	102	0.00333056	7	75	174.785	1950.86	0	1	0	0
10120023	NA	NA	NA	NA	NA	NA	NA	NA	NA	0	0	1	0	0	301	0.017532	7	95	62.72	1950.97	0	1	0	0
10120024	NA	NA	NA	NA	NA	NA	NA	NA	NA	0	0	0	1	0	467	0.0494826	7	70	15.9045	1948.29	0	1	0	0
10120025	NA	NA	NA	NA	NA	NA	NA	NA	NA	0	0	0	0	1	94	0.00285063	13	70	109.825	1949.61	0	1	0	0
10120026	NA	NA	NA	NA	NA	NA	NA	NA	NA	0	0	0	0	1	127	0.0069227	7	72.5	40.0281	1946.9	0	1	0	0
10120027	NA	NA	NA	NA	NA	NA	NA	NA	NA	2	0	0	0	1	289	0.0380739	7	85	14.7368	1952.97	0	1	0	0
10120028	NA	NA	NA	NA	NA	NA	NA	NA	NA	0	0	1	0	0	359	0.0638695	7	60	19.2272	1952.97	0	1	0	0
10120029	NA	NA	NA	NA	NA	NA	NA	NA	NA	0	0	0	0	1	85	0.000282247	7	90	109.825	1949.61	0	1	0	0
10120030	NA	NA	NA	NA	NA	NA	NA	NA	NA	0	1	0	0	1	84	0.00322789	8	70	174.785	1950.86	0	1	0	0
10120031	NA	NA	NA	NA	NA	NA	NA	NA	NA	0	0	0	1	0	79	0.0012276	13	95	217.784	1951.28	0	1	0	0
10120032	NA	NA	NA	NA	NA	NA	NA	NA	NA	1	0	0	0	1	122	0.00337382	7	85	18.5973	1952.97	0	1	0	0
10120033	NA	NA	NA	NA	NA	NA	NA	NA	NA	0	0	0	0	1	92	0.00168875	7	87.5	217.783	1951.28	0	1	0	0
10120034	NA	NA	NA	NA	NA	NA	NA	NA	NA	0	0	0	1	0	115	0.00430934	7	75	35.5214	1952.97	0	1	0	0
10120035	NA	NA	NA	NA	NA	NA	NA	NA	NA	1	0	0	0	1	247	0.0176852	7	65	35.5019	1952.97	0	1	0	0
10120036	NA	NA	NA	NA	NA	NA	NA	NA	NA	0	0	0	0	1	78	0.000902527	7	90	255.581	1951.53	0	1	0	0
10120037	NA	NA	NA	NA	NA	NA	NA	NA	NA	0	0	0	0	1	79	0.00173611	14	80	331.512	1949.41	0	1	0	0
10120038	NA	NA	NA	NA	NA	NA	NA	NA	NA	0	0	0	0	1	72	0.0010661	18	80	357.462	1949.67	0	1	0	0
10120039	NA	NA	NA	NA	NA	NA	NA	NA	NA	0	0	0	1	0	65	0.000226347	16	55	430.968	1950.23	0	1	0	0
10120040	NA	NA	NA	NA	NA	NA	NA	NA	NA	0	0	0	0	1	68	0.000538358	20	55	502.32	1950.61	0	1	0	0
10120041	NA	NA	NA	NA	NA	NA	NA	NA	NA	0	0	0	1	0	298	0.0494037	7	62.5	22.1644	1952.97	0	1	0	0
10120042	NA	NA	NA	NA	NA	NA	NA	NA	NA	0	0	0	1	0	163	0.0128544	7	65	22.9014	1952.97	0	1	0	0
10120043	NA	NA	NA	NA	NA	NA	NA	NA	NA	0	0	0	0	1	95	0.00539635	7	70	49.2667	1952.97	0	1	0	0
10120044	NA	NA	NA	NA	NA	NA	NA	NA	NA	0	1	0	0	1	183	0.0102164	7	100	19.8912	1952.97	0	1	0	0
10120045	NA	NA	NA	NA	NA	NA	NA	NA	NA	0	0	0	0	1	183	0.0128474	7	90	13.2951	1952.97	0	1	0	0
10120046	NA	NA	NA	NA	NA	NA	NA	NA	NA	0	0	0	0	1	233	0.0233051	7	100	13.2951	1952.97	0	1	0	0
10120047	NA	NA	NA	NA	NA	NA	NA	NA	NA	0	0	0	1	0	134	0.0105417	7	85	28.6609	1952.97	0	1	0	0
10120048	NA	NA	NA	NA	NA	NA	NA	NA	NA	0	0	0	0	1	64	0.00141064	24	75	580.928	1946.05	0	1	0	0
10120049	NA	NA	NA	NA	NA	NA	NA	NA	NA	0	0	0	1	0	387	0.0768057	7	70	16.1497	1952.97	0	1	0	0
10120050	NA	NA	NA	NA	NA	NA	NA	NA	NA	0	0	1	0	0	85	0.00475624	7	85	580.811	1946.05	0	1	0	0
10121001	NA	NA	NA	NA	NA	NA	NA	NA	NA	0	1	0	0	1	730	0.10429	8	100	621.091	1942.31	0	0	1	0
10121002	NA	NA	NA	NA	NA	NA	NA	NA	NA	0	2	0	0	1	451	0.121862	6	82.5	587.781	1945.94	0	1	0	0
10121003	NA	NA	NA	NA	NA	NA	NA	NA	NA	0	3	0	0	1	283	0.0550796	6	87.5	5.01876	1952.97	0	1	0	0
10121004	NA	NA	NA	NA	NA	NA	NA	NA	NA	0	1	0	0	1	263	0.0358608	8	70	10.2725	1939.64	0	1	0	0
10121005	NA	NA	NA	NA	NA	NA	NA	NA	NA	0	0	0	0	1	290	0.0427865	6	57.5	6.93976	1952.97	0	1	0	0
10121006	NA	NA	NA	NA	NA	NA	NA	NA	NA	0	1	0	0	1	303	0.0842446	6	30	6.42611	1952.97	0	1	0	0
10121007	NA	NA	NA	NA	NA	NA	NA	NA	NA	0	0	0	0	1	296	0.0360111	6	92.5	3.98505	1952.97	0	1	0	0
10121008	NA	NA	NA	NA	NA	NA	NA	NA	NA	1	0	0	0	1	151	0.00816649	6	67.5	18.4237	1952.97	0	1	0	0
10121009	NA	NA	NA	NA	NA	NA	NA	NA	NA	0	1	0	0	1	159	0.00265487	8	55	10.9614	1952.97	0	1	0	0
10121010	NA	NA	NA	NA	NA	NA	NA	NA	NA	0	0	0	0	1	146	0.00651303	9	65	14.0462	1952.97	0	1	0	0
10121011	NA	NA	NA	NA	NA	NA	NA	NA	NA	0	0	0	1	0	120	0.00244011	9	75	29.3143	1957.02	0	1	0	0
10121012	NA	NA	NA	NA	NA	NA	NA	NA	NA	1	1	1	0	0	109	0.00354941	8	62.5	42.2958	1955.78	0	1	0	0
10121013	NA	NA	NA	NA	NA	NA	NA	NA	NA	0	0	0	0	1	90	0.00614102	12	32.5	674.801	1942.22	0	1	0	0
10121014	NA	NA	NA	NA	NA	NA	NA	NA	NA	0	0	0	0	1	56	0.0012888	25	50	604.878	1945.84	0	1	0	0
10121015	NA	NA	NA	NA	NA	1	NA	1	1	0	0	0	0	1	74	0.0106474	27	40	5360.52	3301.36	0	1	0	0
10122001	NA	NA	NA	NA	NA	NA	NA	NA	NA	0	2	1	0	0	553	0.0607235	8	60	47.6249	1808.27	0	0	1	0
10122002	NA	NA	NA	NA	NA	NA	NA	NA	NA	0	0	0	1	0	448	0.0545486	8	75	14.2069	1808.27	0	1	0	0
10122003	NA	NA	NA	NA	NA	NA	NA	NA	NA	0	0	0	0	1	56	0.00367107	16	60	77.3261	1808.27	0	0	1	0
10122004	NA	NA	NA	NA	NA	NA	NA	NA	NA	0	1	1	0	0	410	0.0938826	6	90	14.1856	1808.27	0	0	1	0
10122005	NA	NA	NA	NA	NA	NA	NA	NA	NA	0	0	1	0	0	325	0.0572021	6	90	27.19	1808.27	0	1	0	0
10122006	NA	NA	NA	NA	NA	1	NA	NA	NA	0	1	1	0	0	300	0.0456116	8	80	65.1449	1808.27	0	0	1	0
10122007	NA	NA	NA	NA	NA	NA	NA	NA	NA	0	0	1	0	0	35	0.00434116	17	90	83.8463	1808.27	0	1	0	0
10122008	NA	NA	NA	NA	NA	NA	NA	NA	NA	0	0	0	0	1	17	0.00201776	21	68.5	5567.53	3245.49	0	0	1	0
10122009	NA	NA	NA	NA	NA	NA	NA	NA	NA	0	1	0	1	0	305	0.0453017	8	65	14.0976	1808.27	0	1	0	0
10122010	NA	NA	NA	NA	NA	NA	NA	NA	NA	0	0	0	1	0	70	0.00821018	22	65	5452.39	3276.05	0	0	1	0
10122011	NA	NA	NA	NA	NA	NA	NA	NA	NA	0	5	0	0	1	121	0.017384	8	70	5424.11	3283.75	0	0	1	0
10122012	NA	NA	NA	NA	NA	NA	NA	NA	NA	0	2	0	0	1	78	0.00783929	17	90	5377.28	3296.67	0	1	0	0
10122013	NA	NA	NA	NA	NA	NA	NA	NA	NA	0	1	0	1	0	195	0.018074	6	90	11.1894	1808.27	0	0	1	0
10122014	NA	NA	NA	NA	NA	NA	NA	NA	NA	0	2	0	0	1	84	0.00323071	15	85	15.6655	1808.27	0	1	0	0
10122015	NA	NA	NA	NA	NA	NA	NA	NA	NA	0	1	0	1	0	66	0.0123859	13	85	5399.61	3290.49	0	1	0	0
10122016	NA	NA	NA	NA	NA	NA	NA	NA	NA	0	2	0	1	0	180	0.0341379	20	77.5	5413.77	3286.59	0	1	0	0
10122017	NA	NA	NA	NA	NA	NA	NA	NA	NA	0	1	0	0	1	187	0.0181469	8	62.5	12.7021	1808.27	0	0	1	0
10122018	NA	NA	NA	NA	NA	NA	NA	NA	NA	0	1	0	1	0	34	0.000363636	120	45	5362.34	3300.85	0	1	0	0
10122019	NA	NA	NA	NA	NA	NA	NA	NA	NA	0	2	0	0	1	35	0.000237812	190	70	5413.94	3286.54	0	1	0	0
10122020	NA	NA	NA	NA	NA	1	NA	1	1	0	1	0	0	1	22	0.000839772	140	67.5	5567.58	3245.47	0	0	1	0
10122021	NA	NA	NA	NA	NA	NA	NA	NA	NA	0	0	1	0	0	131	0.0130589	9	77.5	31.2432	1808.27	0	0	1	0
10123001	NA	NA	NA	NA	NA	NA	NA	NA	NA	0	2	1	0	0	292	0.0351939	8	80	5749.41	3199.74	0	0	1	0
10123002	NA	NA	NA	NA	NA	NA	NA	NA	NA	0	2	1	0	0	265	0.0542587	6	90	15.605	1808.27	0	0	1	0
10123003	NA	NA	NA	NA	NA	NA	NA	NA	NA	0	0	0	1	0	418	0.0389105	8	75	25.7603	1808.27	0	1	0	0
10123004	NA	NA	NA	NA	NA	NA	NA	NA	NA	0	0	1	0	0	394	0.0640845	8	80	18.2991	1808.27	0	0	1	0
10123005	NA	NA	NA	NA	NA	NA	NA	NA	NA	0	0	1	0	0	293	0.0617137	6	72.5	10.7522	1808.27	0	0	1	0
10123006	NA	NA	NA	1	NA	NA	NA	1	NA	0	0	0	1	0	34	0.00509413	6	60	47.4869	1808.27	0	1	0	0
10123007	NA	NA	NA	NA	NA	NA	NA	NA	NA	1	0	0	0	1	48	0.00122875	10	80	12.2442	1808.27	0	0	1	0
10123008	NA	NA	NA	NA	NA	NA	NA	NA	NA	1	0	0	0	1	44	0.000418235	10	95	18.1289	1808.27	0	0	1	0
10123009	NA	NA	NA	NA	NA	NA	NA	NA	NA	0	0	1	0	0	126	0.0285807	8	90	11.0677	1808.27	0	1	0	0
10123010	NA	NA	NA	NA	NA	NA	NA	NA	NA	0	0	0	0	1	38	0.00605327	14	77.5	24.0455	1808.27	0	1	0	0
10123011	NA	NA	NA	NA	NA	NA	NA	NA	NA	0	0	0	0	1	160	0.0176194	15	57.5	5690.11	3214.32	0	0	1	0
10123012	1	NA	1	NA	NA	1	NA	1	1	0	0	0	0	1	10	0.000221828	180	55	5691.69	3213.93	0	0	1	0
10123013	NA	NA	NA	NA	NA	NA	NA	NA	NA	0	0	1	0	0	9	0.000431433	250	50	5725	3205.71	0	1	0	0
10130001	NA	NA	NA	NA	NA	NA	NA	NA	NA	0	0	0	0	1	753	0.0449947	8	100	26.0029	2429.95	0	0	0	1
10130002	NA	NA	NA	NA	NA	NA	NA	NA	NA	0	1	0	0	1	864	0.0540719	8	100	26.0029	2429.95	0	0	0	1
10130003	NA	NA	NA	NA	NA	NA	NA	NA	NA	0	5	0	0	1	893	0.0676489	8	70	10.6931	2424.39	0	0	0	1
10130004	NA	NA	NA	NA	NA	NA	NA	NA	NA	0	1	0	0	1	365	0.00993657	7	77.5	96.5462	2425.64	0	0	1	0
10130005	NA	NA	NA	NA	NA	NA	NA	NA	NA	0	0	0	0	1	454	0.0185084	7	50	39.8292	2427.88	0	0	0	1
10130006	NA	NA	NA	NA	NA	NA	NA	NA	NA	0	0	0	0	1	318	0.00693521	7	75	147.186	2425.07	0	0	1	0
10130007	NA	NA	NA	NA	NA	1	NA	1	NA	0	0	0	0	1	245	0.0052965	21	90	241.285	2424.65	0	0	1	0
10130008	NA	NA	NA	NA	NA	NA	NA	NA	NA	0	2	0	0	1	282	0.0078285	7	85	190.195	2424.82	0	0	1	0
10130009	NA	NA	NA	NA	NA	NA	NA	NA	NA	0	1	0	0	1	735	0.0526538	7	60	16.8345	2423.98	0	0	1	0
10130010	NA	NA	NA	NA	NA	NA	NA	NA	NA	0	0	0	1	0	631	0.0394645	7	70	30.9566	2423.98	0	0	1	0
10130011	NA	NA	NA	NA	NA	NA	NA	NA	NA	0	2	0	0	1	236	0.0057434	7	100	246.08	2416.18	0	0	1	0
10130012	NA	NA	NA	NA	NA	NA	NA	NA	NA	0	1	0	0	1	174	0.00424114	33	100	546.054	2259.18	0	1	0	0
10130013	NA	NA	NA	NA	NA	NA	NA	NA	NA	0	2	0	0	1	462	0.0292479	9	57.5	50.6646	2423.98	0	1	0	0
10130014	NA	NA	NA	NA	NA	NA	NA	NA	NA	0	0	0	1	0	570	0.0429549	7	62.5	28.8723	2423.98	0	1	0	0
10130015	NA	NA	NA	NA	NA	NA	NA	NA	NA	0	0	0	0	1	231	0.00346873	7	100	89.5426	2423.98	0	1	0	0
10130016	NA	NA	NA	NA	NA	NA	NA	NA	NA	0	0	0	1	0	275	0.0135477	7	80	127.705	2265.49	0	1	0	0
10130017	NA	NA	NA	NA	NA	NA	NA	NA	NA	0	0	0	0	1	200	0.0113324	12	50	151.102	2290.01	0	1	0	0
10130018	NA	NA	NA	NA	NA	NA	NA	NA	NA	0	1	1	0	0	473	0.0456853	7	70	20.078	2423.98	0	1	0	0
10130019	NA	NA	NA	NA	NA	NA	NA	NA	NA	0	0	0	1	0	167	0.00124938	7	67.5	166.664	2285.76	0	1	0	0
10130020	NA	NA	NA	NA	NA	NA	NA	NA	NA	0	1	1	0	0	692	0.064341	7	60	36.5615	1873.43	0	1	0	0
10130021	NA	NA	NA	NA	NA	NA	NA	NA	NA	0	1	1	0	0	290	0.0411692	7	85	88.8013	2423.98	0	1	0	0
10130022	NA	NA	NA	NA	NA	NA	NA	NA	NA	0	4	0	1	0	741	0.113548	7	65	4.09152	2423.98	0	1	0	0
10130023	NA	NA	NA	NA	NA	NA	NA	NA	NA	0	1	0	0	1	630	0.0351738	7	62.5	6.47893	2423.98	0	1	0	0
10130024	NA	NA	NA	NA	NA	NA	NA	NA	NA	0	0	1	0	0	833	0.101969	7	70	26.4626	2423.98	0	1	0	0
10130025	NA	NA	NA	NA	NA	NA	NA	NA	NA	0	1	0	0	1	449	0.0424176	7	50	8.31546	2362.23	0	0	1	0
10130026	NA	NA	NA	NA	NA	NA	NA	NA	NA	0	0	0	1	0	157	0.000436364	7	55	181.225	2247.48	0	1	0	0
10130027	NA	NA	NA	NA	NA	NA	NA	NA	NA	0	0	0	1	0	154	0.00255161	16	65	190.164	2226.9	0	1	0	0
10130028	NA	NA	NA	NA	NA	NA	NA	NA	NA	0	1	1	0	0	483	0.109695	7	70	174.894	2263.43	0	1	0	0
10130029	NA	NA	NA	NA	NA	NA	NA	NA	NA	0	1	1	0	0	648	0.146291	7	80	2.91312	1808.27	0	1	0	0
10130030	NA	NA	NA	NA	NA	NA	NA	NA	NA	0	1	1	0	0	605	0.169726	7	100	186.485	2235.14	0	1	0	0
10130031	NA	NA	NA	NA	NA	NA	NA	NA	NA	0	0	0	0	1	143	0.00215813	19	100	196.366	2213.68	0	1	0	0
10130032	NA	NA	NA	NA	NA	NA	NA	NA	NA	0	1	0	1	0	365	0.0585752	7	85	4.30306	1808.27	0	1	0	0
10130033	NA	NA	NA	NA	NA	NA	NA	NA	NA	0	0	0	0	1	132	0.00193931	25	100	557.002	2250.32	0	1	0	0
10130034	NA	NA	NA	NA	NA	NA	NA	NA	NA	0	1	0	0	1	280	0.02143	7	90	253.58	2406.78	0	0	1	0
10130035	NA	NA	NA	NA	NA	NA	NA	NA	NA	0	2	0	1	0	482	0.0493805	7	75	198.56	2424.79	0	1	0	0
10130036	NA	NA	NA	NA	NA	NA	NA	NA	NA	0	2	0	1	0	548	0.0320038	7	75	133.836	2425.18	0	0	1	0
10130037	NA	NA	NA	NA	NA	NA	NA	NA	NA	0	2	0	0	1	516	0.0225322	7	60	49.4208	2424.07	0	1	0	0
10130038	NA	NA	NA	NA	NA	NA	NA	NA	NA	0	1	0	0	1	848	0.0742445	7	70	19.8816	2424.2	0	0	0	1
10130039	NA	NA	NA	NA	NA	NA	NA	NA	NA	0	1	0	0	1	720	0.0649234	7	71	26.8518	2424.14	0	0	0	1
10130040	NA	NA	NA	NA	NA	NA	NA	NA	NA	0	0	0	0	1	410	0.0206704	7	50	3.00077	2423.98	0	0	1	0
10130041	NA	NA	NA	NA	NA	NA	NA	NA	NA	0	0	0	0	1	812	0.102711	7	100	14.7651	2434.5	0	0	0	1
10130042	NA	NA	NA	NA	NA	NA	NA	NA	NA	0	4	0	0	1	490	0.0236686	7	60	10.9707	2423.98	0	0	1	0
10130043	NA	NA	NA	NA	NA	NA	NA	NA	NA	0	0	0	0	1	356	0.01377	7	70	14.469	2423.98	0	0	1	0
10130044	NA	NA	NA	NA	NA	NA	NA	NA	NA	0	2	0	0	1	328	0.00890438	7	80	21.3157	2423.98	0	0	1	0
10130045	NA	NA	NA	NA	NA	NA	NA	NA	NA	0	3	0	0	1	297	0.0160296	7	90	16.7146	2423.98	0	0	1	0
10130046	NA	NA	NA	NA	NA	NA	NA	NA	NA	0	1	0	0	1	235	0.0188147	7	95	3.74744	1808.27	0	1	0	0
10130047	NA	NA	NA	NA	NA	NA	NA	NA	NA	0	0	0	0	1	161	0.00452804	7	95	83.2029	1986.76	0	0	1	0
10130048	NA	NA	NA	NA	NA	NA	NA	NA	NA	0	2	0	0	1	264	0.00952093	7	85	7.00195	1930.56	0	0	1	0
10130049	NA	NA	NA	NA	NA	NA	NA	NA	NA	0	0	0	0	1	201	0.0133947	7	60	72.3458	2013.65	0	0	1	0
10130050	NA	NA	NA	NA	NA	NA	NA	NA	NA	0	0	1	0	0	495	0.0266749	7	70	26.1429	2343.82	0	0	1	0
10130051	NA	NA	NA	NA	NA	NA	NA	NA	NA	0	2	0	0	1	358	0.017489	7	90	26.1429	2343.82	0	0	1	0
10130052	NA	NA	NA	NA	NA	NA	NA	NA	NA	0	0	0	0	1	235	0.0130601	7	95	39.7836	2160.36	0	0	1	0
10130053	NA	NA	NA	NA	NA	NA	NA	NA	NA	0	0	0	0	1	248	0.013976	7	72.5	8.18407	1808.27	0	0	1	0
10130054	NA	NA	NA	NA	NA	NA	NA	NA	NA	0	0	0	0	1	170	0.00637189	7	70	72.3458	2013.65	0	0	1	0
10130055	NA	NA	NA	NA	NA	NA	NA	NA	NA	0	0	0	0	1	248	0.0131802	7	80	53.998	2067.53	0	0	1	0
10130056	NA	NA	NA	NA	NA	NA	NA	NA	NA	0	0	0	0	1	134	0.00123801	7	70	77.9307	1998.81	0	0	1	0
10130057	NA	NA	NA	NA	NA	NA	NA	NA	NA	1	0	0	0	1	130	0.00251509	16	100	557.002	2250.32	0	1	0	0
10130058	NA	NA	NA	NA	NA	NA	NA	1	1	0	0	0	1	0	115	0.00251467	7	60	644.838	2190.07	0	1	0	0
10130059	NA	NA	NA	NA	NA	NA	NA	NA	NA	0	2	0	0	1	190	0.0140937	7	90	5.19586	1808.27	0	1	0	0
10130060	NA	NA	NA	NA	NA	NA	NA	NA	NA	0	3	0	0	1	213	0.018208	7	95	13.9166	1808.27	0	0	1	0
10130061	NA	NA	NA	NA	NA	NA	NA	NA	NA	0	2	0	0	1	221	0.0169492	7	95	13.9166	1808.27	0	0	1	0
10130062	NA	NA	NA	NA	NA	NA	NA	NA	NA	0	0	0	1	0	137	0.00162034	7	87.5	34.14	1808.27	0	0	1	0
10130063	NA	NA	NA	NA	NA	NA	NA	NA	NA	0	0	1	0	0	124	0.00335633	7	85	644.598	2190.21	0	1	0	0
10130064	NA	NA	NA	NA	NA	NA	NA	NA	NA	0	1	1	0	0	254	0.0202451	7	67.5	10.7615	1808.27	0	1	0	0
10130065	NA	NA	NA	NA	NA	NA	NA	NA	NA	0	0	0	1	0	140	0.0067757	7	87.5	31.2301	1808.27	0	1	0	0
10130066	NA	NA	NA	NA	NA	NA	NA	NA	NA	0	1	1	0	0	447	0.0422953	7	87.5	81.568	1808.27	0	1	0	0
10130067	NA	NA	NA	NA	NA	NA	NA	NA	NA	0	0	1	0	0	605	0.0802113	7	95	81.568	1808.27	0	1	0	0
10131001	NA	NA	NA	NA	NA	NA	NA	NA	NA	0	0	0	0	1	89	0.00251691	8	80	974.564	2060.91	0	1	0	0
10131002	NA	NA	NA	NA	NA	NA	NA	NA	NA	0	3	0	0	1	490	0.0707159	8	80	781.147	2123.46	0	1	0	0
10131003	NA	NA	NA	NA	NA	NA	NA	NA	NA	0	0	0	1	0	582	0.0719868	8	90	45.1877	1808.27	0	1	0	0
10131004	NA	NA	NA	NA	NA	NA	NA	NA	NA	0	0	0	0	1	393	0.0589865	8	70	55.5972	1808.27	0	1	0	0
10131005	NA	NA	NA	NA	NA	NA	NA	NA	NA	0	3	1	0	0	544	0.075465	6	70	18.9697	1808.27	0	1	0	0
10131006	NA	NA	NA	NA	NA	NA	NA	NA	NA	0	1	1	0	0	553	0.0790826	8	90	18.8945	1808.27	0	1	0	0
10131007	NA	NA	NA	NA	NA	NA	NA	NA	NA	0	0	0	1	0	122	0.00304878	10	80	45.1877	1808.27	0	1	0	0
10131008	NA	NA	NA	NA	NA	NA	NA	NA	NA	0	0	0	0	1	103	0.00171306	10	90	50.3632	1808.27	0	1	0	0
10131009	NA	NA	NA	NA	NA	NA	NA	NA	NA	0	6	1	0	0	582	0.0824347	8	90	15.5384	1808.27	0	1	0	0
10131010	NA	NA	NA	NA	NA	NA	NA	NA	NA	0	0	0	0	1	131	0.003197	8	70	32.0782	1808.27	0	1	0	0
10131011	NA	NA	NA	NA	NA	NA	NA	NA	NA	0	3	0	0	1	124	0.00274366	6	70	7.78373	1808.27	0	1	0	0
10131012	NA	NA	NA	NA	NA	NA	NA	NA	NA	0	2	0	1	0	457	0.0439909	8	80	20.1002	1808.27	0	1	0	0
10131013	NA	NA	NA	NA	NA	NA	NA	NA	NA	0	0	0	0	1	110	0.00412868	8	90	31.0576	1808.27	0	1	0	0
10131014	NA	NA	NA	NA	NA	NA	NA	NA	NA	0	0	0	0	1	244	0.0275183	6	90	797.474	2117.02	0	1	0	0
10131015	NA	NA	NA	NA	NA	NA	NA	NA	NA	0	0	0	0	1	86	0.00124135	30	100	797.474	2117.02	0	1	0	0
10131016	NA	NA	NA	NA	NA	NA	NA	NA	NA	0	0	0	0	1	79	0.00115075	35	100	974.988	2060.79	0	1	0	0
10131017	NA	NA	NA	NA	NA	NA	NA	NA	NA	0	1	0	0	1	482	0.047811	6	100	18.3225	1808.27	0	1	0	0
10131018	NA	NA	NA	NA	NA	NA	NA	NA	NA	0	0	0	0	1	138	0.00563169	8	100	43.9676	1808.27	0	1	0	0
10131019	NA	NA	NA	NA	NA	NA	NA	NA	NA	0	0	0	0	1	333	0.0431945	6	100	43.9676	1808.27	0	1	0	0
10131020	NA	NA	NA	NA	NA	NA	NA	NA	NA	0	0	0	1	0	108	0.00202173	8	95	61.2971	1808.27	0	1	0	0
10131021	NA	NA	NA	NA	NA	NA	NA	NA	NA	0	2	1	0	0	499	0.0807606	6	85	15.4908	1808.27	0	1	0	0
10131022	NA	NA	NA	NA	NA	NA	NA	NA	NA	0	2	0	1	0	489	0.0953804	6	90	15.4908	1808.27	0	1	0	0
10131023	NA	NA	NA	NA	NA	NA	NA	NA	NA	0	0	1	0	0	138	0.00560082	8	90	44.1885	1808.27	0	1	0	0
10131024	NA	NA	NA	NA	NA	NA	NA	NA	NA	0	0	0	0	1	443	0.0870237	6	90	44.2045	1808.27	0	1	0	0
10131025	NA	NA	NA	NA	NA	NA	NA	NA	NA	0	0	0	1	0	105	0.00235422	8	100	131.637	1808.27	0	1	0	0
10131026	NA	NA	NA	NA	NA	NA	NA	NA	NA	0	1	0	1	0	368	0.059694	6	100	7.58017	1808.27	0	1	0	0
10131027	NA	NA	NA	NA	NA	NA	NA	NA	NA	0	0	1	0	0	165	0.0128646	6	100	68.8922	1808.27	0	1	0	0
10131028	NA	NA	NA	NA	NA	NA	NA	NA	NA	0	0	0	0	1	92	0.00184006	8	100	960.84	2064.5	0	1	0	0
10131029	NA	NA	NA	NA	NA	NA	NA	NA	NA	0	1	0	0	1	295	0.0252682	6	100	155.897	1808.27	0	1	0	0
10131030	NA	NA	NA	NA	NA	NA	NA	NA	NA	0	0	0	0	1	105	0.000744602	30	90	682.08	2169.22	0	1	0	0
10131031	NA	NA	NA	NA	NA	NA	NA	NA	NA	0	0	0	0	1	102	0.00171877	30	90	781.147	2123.46	0	1	0	0
10132001	NA	NA	NA	NA	NA	NA	NA	NA	NA	0	0	0	0	1	447	0.0481655	8	80	45.9938	1937.59	0	0	1	0
10132002	NA	NA	NA	NA	NA	NA	NA	NA	NA	0	0	0	0	1	306	0.0157177	10	50	20.4263	2099.64	0	1	0	0
10132003	NA	NA	NA	NA	NA	NA	NA	NA	NA	0	0	0	0	1	157	0.0058813	8	30	47.7273	1932.92	0	0	1	0
10132004	NA	NA	NA	NA	NA	NA	NA	NA	NA	0	3	0	0	1	664	0.0988777	12	60	26.4694	2033.11	0	0	1	0
10132005	NA	NA	NA	NA	NA	NA	NA	NA	NA	0	2	0	0	1	424	0.0325554	8	20	33.3283	2423.98	1	0	0	0
10132006	NA	NA	NA	NA	NA	NA	NA	NA	NA	0	2	0	0	1	389	0.0221835	8	30	22.6564	2423.98	0	0	1	0
10132007	NA	NA	NA	NA	NA	NA	NA	NA	NA	0	2	0	0	1	378	0.0194845	8	35	3.03518	2423.98	0	0	1	0
10132008	NA	NA	NA	NA	NA	NA	NA	NA	NA	0	0	0	0	1	297	0.00588847	12	50	5.10802	2423.98	0	0	1	0
10132009	NA	NA	NA	NA	NA	NA	NA	NA	NA	0	0	0	0	1	273	0.0190114	10	65	38.8691	2423.98	0	0	1	0
10132010	NA	NA	NA	NA	NA	NA	NA	NA	NA	0	0	0	0	1	327	0.0204278	10	40	22.3002	2423.98	0	0	1	0
10132011	NA	NA	NA	NA	NA	NA	NA	NA	NA	0	0	0	0	1	381	0.0283582	6	55	8.94589	2423.98	0	0	1	0
10132012	NA	NA	NA	NA	NA	NA	NA	NA	NA	0	1	0	0	1	359	0.023	6	50	4.41493	2423.98	0	0	1	0
10132013	NA	NA	NA	NA	NA	NA	NA	NA	NA	0	0	0	0	1	269	0.00856898	8	60	68.3694	2423.98	0	0	1	0
10132014	NA	NA	NA	NA	NA	NA	NA	NA	NA	0	0	0	0	1	271	0.0130385	6	50	2.73098	2423.98	0	0	1	0
10132015	NA	NA	NA	NA	NA	NA	NA	NA	NA	0	0	0	0	1	203	0.00339147	8	60	122.684	2423.98	0	0	1	0
10132016	NA	NA	NA	NA	NA	NA	NA	NA	NA	0	1	0	0	1	564	0.139319	8	50	25.3598	2423.98	0	0	1	0
10132017	NA	NA	NA	NA	NA	NA	NA	NA	NA	0	1	0	0	1	276	0.00446191	8	35	19.1606	2423.98	0	0	1	0
10132018	NA	NA	NA	NA	NA	NA	NA	NA	NA	0	1	0	0	1	235	0.00505494	8	25	121.861	2423.98	0	1	0	0
10132019	NA	NA	NA	NA	NA	NA	NA	NA	NA	0	0	0	0	1	269	0.00910364	6	50	4.84952	2423.98	1	0	0	0
10132020	NA	NA	NA	NA	NA	NA	NA	NA	NA	0	0	0	0	1	190	0.00547945	10	50	238.067	2406.23	0	0	1	0
10132021	NA	NA	NA	NA	NA	NA	NA	NA	NA	0	7	0	0	1	250	0.00799893	6	10	6.44423	2423.98	0	1	0	0
10132022	NA	NA	NA	NA	NA	NA	NA	NA	NA	0	5	0	0	1	233	0.00964416	6	20	86.7942	2423.98	0	0	1	0
10132023	NA	NA	NA	NA	NA	NA	NA	NA	NA	0	5	0	0	1	294	0.00638556	8	60	28.5064	2423.98	1	0	0	0
10132024	NA	NA	NA	NA	NA	NA	NA	NA	NA	0	3	0	0	1	297	0.00804537	8	55	11.2396	2423.98	0	1	0	0
10132025	NA	NA	NA	NA	NA	NA	NA	NA	NA	0	1	0	0	1	236	0.00279447	8	65	54.3385	2423.98	0	1	0	0
10132026	NA	NA	NA	NA	NA	NA	NA	NA	NA	0	2	0	0	1	221	0.00705305	8	60	63.9818	2423.98	1	0	0	0
10132027	NA	NA	NA	NA	NA	NA	NA	NA	NA	0	1	0	0	1	310	0.0130056	6	50	9.25595	2423.98	0	1	0	0
10132028	NA	NA	NA	NA	NA	NA	NA	NA	NA	0	1	0	0	1	364	0.0421053	6	50	13.3944	2423.98	0	0	1	0
10132029	NA	NA	NA	NA	NA	NA	NA	NA	NA	0	2	0	0	1	210	0.010116	6	60	81.8101	2423.98	0	1	0	0
10132030	NA	NA	NA	NA	NA	NA	NA	NA	NA	0	0	0	0	1	175	0.00304273	12	60	238.067	2406.23	0	0	1	0
10132031	NA	NA	NA	NA	NA	NA	NA	NA	NA	0	0	0	0	1	152	0.0026643	18	67.5	248.609	2380.89	0	0	1	0
10132032	NA	NA	NA	NA	NA	NA	NA	NA	NA	0	1	0	0	1	328	0.0291439	6	35	46.3865	2381.33	0	1	0	0
10132033	NA	NA	NA	NA	NA	NA	NA	NA	NA	0	2	0	0	1	249	0.0277207	6	50	2.28329	2423.98	0	1	0	0
10132034	NA	NA	NA	NA	NA	NA	NA	NA	NA	0	2	0	0	1	331	0.0121869	6	60	15.1244	2423.98	0	1	0	0
10132035	NA	NA	NA	NA	NA	NA	NA	NA	NA	0	3	0	0	1	305	0.0132131	6	47.5	15.136	2423.98	0	1	0	0
10132036	NA	NA	NA	NA	NA	NA	NA	NA	NA	0	0	0	0	1	223	0.00687548	6	65	21.7008	2423.98	0	1	0	0
10132037	NA	NA	NA	NA	NA	NA	NA	NA	NA	0	3	0	0	1	263	0.0126641	6	60	3.22579	2423.98	0	1	0	0
10132038	NA	NA	NA	NA	NA	NA	NA	NA	NA	0	3	0	0	1	314	0.0162183	6	60	35.3794	2423.98	0	1	0	0
10132039	NA	NA	NA	NA	NA	NA	NA	NA	NA	0	0	0	0	1	186	0.00137552	10	70	83.1223	2198.33	0	1	0	0
10132040	NA	NA	NA	NA	NA	NA	NA	NA	NA	0	2	0	0	1	160	0.00750408	12	70	93.1554	2156.26	0	1	0	0
10132041	NA	NA	NA	NA	NA	NA	NA	NA	NA	0	3	0	0	1	626	0.0578744	6	65	18.388	2118.57	0	1	0	0
10132042	NA	NA	NA	NA	NA	NA	NA	NA	NA	0	2	0	0	1	544	0.0817342	6	70	5.8789	1808.27	0	1	0	0
10132043	NA	NA	NA	NA	NA	NA	NA	NA	NA	0	0	0	0	1	471	0.114167	6	100	27.5558	2019.72	0	1	0	0
10132044	NA	NA	NA	NA	NA	NA	NA	NA	NA	0	0	0	0	1	201	0.00760395	12	60	83.1223	2198.33	0	1	0	0
10132045	NA	NA	NA	NA	NA	NA	NA	NA	NA	0	0	0	0	1	137	0.00245006	15	60	395.714	2265.04	0	1	0	0
10132046	NA	NA	NA	NA	NA	NA	NA	NA	NA	0	4	0	0	1	563	0.0872766	6	100	92.9986	2156.84	0	1	0	0
10133001	NA	NA	NA	NA	NA	NA	NA	NA	NA	0	0	1	0	0	269	0.028169	8	80	26.4611	1808.27	0	0	1	0
10133002	NA	NA	NA	NA	NA	NA	NA	NA	NA	0	0	0	0	1	108	0.00391304	8	60	39.473	1808.27	0	0	1	0
10133003	NA	NA	NA	NA	NA	NA	NA	NA	NA	0	2	1	0	0	824	0.146777	6	100	11.7488	1808.27	0	0	1	0
10133004	NA	NA	NA	NA	NA	NA	NA	NA	NA	0	1	1	0	0	774	0.0820732	6	75	18.9901	1808.27	0	0	1	0
10133005	NA	NA	NA	NA	NA	NA	NA	NA	NA	0	0	0	0	1	100	0.00446761	6	10	590.652	2114.37	0	0	1	0
10133006	NA	NA	NA	NA	NA	NA	NA	NA	NA	0	1	0	0	1	526	0.136982	8	100	4.02694	1808.27	0	0	1	0
10133007	NA	NA	NA	NA	NA	NA	NA	NA	NA	0	2	1	0	0	284	0.0576441	8	70	23.3146	1808.27	0	0	1	0
10133008	NA	NA	NA	NA	NA	NA	NA	NA	NA	0	3	0	0	1	106	0.00348189	8	50	35.4529	1808.27	0	0	1	0
10133009	NA	NA	NA	NA	NA	NA	NA	NA	NA	0	4	1	0	0	514	0.0360282	10	80	35.0206	1808.27	0	1	0	0
10133010	NA	NA	NA	NA	NA	NA	NA	NA	NA	0	0	0	0	1	131	0.00361395	15	40	472.775	2190.63	0	0	1	0
10133011	NA	NA	NA	NA	NA	NA	NA	NA	NA	0	5	1	0	0	734	0.0815937	8	65	12.5298	1808.27	0	0	1	0
10133012	NA	NA	NA	NA	NA	NA	NA	NA	NA	0	3	0	0	1	430	0.0543165	8	50	411.775	2247.22	0	0	1	0
10133013	NA	NA	NA	NA	NA	NA	NA	NA	NA	1	0	0	0	1	123	0.00144881	20	30	472.775	2190.63	0	1	0	0
10133014	NA	NA	NA	NA	NA	NA	NA	NA	NA	0	0	0	0	1	115	0.000979816	25	50	538.787	2143.82	0	1	0	0
10133015	NA	NA	NA	NA	NA	NA	NA	NA	NA	1	1	0	0	1	195	0.0170373	8	80	33.4565	1808.27	0	1	0	0
10133016	NA	NA	NA	NA	NA	NA	NA	NA	NA	0	0	0	0	1	285	0.0364505	10	75	10.5058	1808.27	0	1	0	0
10133017	NA	NA	NA	NA	NA	NA	NA	NA	NA	0	2	1	0	0	653	0.0845594	8	90	23.3526	1808.27	0	1	0	0
10133018	NA	NA	NA	NA	NA	NA	NA	NA	NA	0	0	0	0	1	154	0.00491489	12	30	55.5916	1808.27	0	1	0	0
10133019	NA	NA	NA	NA	NA	NA	NA	NA	NA	0	2	0	0	1	551	0.125409	15	60	41.5908	1808.27	0	0	1	0
10133020	NA	NA	NA	NA	NA	NA	NA	NA	NA	0	1	0	0	1	595	0.166494	8	90	52.8558	1808.27	0	0	1	0
10133021	NA	NA	NA	NA	NA	NA	NA	NA	NA	0	1	0	0	1	600	0.19543	15	100	55.5661	1808.27	0	0	1	0
10133022	NA	NA	NA	NA	NA	NA	NA	NA	NA	0	1	0	0	1	588	0.205415	12	80	543.569	2140.88	0	0	1	0
10133023	NA	NA	NA	NA	NA	NA	NA	NA	NA	0	0	0	0	1	100	0.00171551	40	20	592.156	2113.59	0	1	0	0
10133024	NA	NA	NA	NA	NA	NA	NA	NA	NA	0	5	0	0	1	580	0.094086	15	50	551.917	2135.85	0	1	0	0
10133025	NA	NA	NA	NA	NA	NA	NA	NA	NA	0	1	0	0	1	90	0.00136463	10	20	600.303	2109.44	0	1	0	0
10133026	NA	NA	NA	NA	NA	NA	NA	NA	1	0	0	0	0	1	582	0.0940499	25	60	648.868	2086.87	0	1	0	0
10133027	NA	NA	NA	NA	NA	NA	NA	NA	NA	0	0	0	0	1	107	0.00241774	50	75	545.075	2139.96	0	1	0	0
10134001	NA	NA	NA	NA	NA	NA	NA	NA	NA	0	1	0	0	1	33	0.00190182	8	100	1850.8	2038.14	0	1	0	0
10134002	NA	NA	NA	NA	NA	NA	NA	NA	NA	0	0	1	0	0	426	0.0329204	8	100	21.3486	1808.27	0	1	0	0
10134003	NA	NA	NA	NA	NA	NA	NA	NA	NA	0	1	1	0	0	425	0.0580872	8	100	31.3185	1808.27	0	1	0	0
10134004	NA	NA	NA	NA	NA	NA	NA	NA	NA	0	0	1	0	0	139	0.00839563	10	90	58.5781	1808.27	0	1	0	0
10134005	NA	NA	NA	NA	NA	NA	NA	NA	NA	0	0	1	0	0	287	0.0482718	6	90	38.4644	1808.27	0	1	0	0
10134006	NA	NA	NA	NA	NA	NA	NA	NA	NA	0	0	0	0	1	66	0.00251572	15	95	85.356	1808.27	0	1	0	0
10134007	NA	NA	NA	NA	NA	NA	NA	NA	NA	0	1	0	0	1	166	0.0242233	6	95	5.9869	1808.27	0	1	0	0
10134008	NA	NA	NA	NA	NA	NA	NA	NA	NA	0	0	1	0	0	531	0.0607806	8	90	17.9067	1808.27	0	1	0	0
10134009	NA	NA	NA	NA	NA	NA	NA	NA	NA	0	1	1	0	0	392	0.046295	8	80	14.2947	1808.27	0	1	0	0
10134010	NA	NA	1	NA	1	1	NA	1	1	0	0	0	1	0	72	0.000981836	80	95	1640.19	2068.6	0	1	0	0
10134011	NA	NA	NA	NA	NA	NA	NA	NA	NA	0	0	0	0	1	62	0.000476588	80	90	1655.08	2066.26	0	0	1	0
10134012	NA	NA	NA	NA	NA	NA	NA	NA	NA	0	0	0	0	1	58	0.00138622	80	95	1675.28	2063.15	0	1	0	0
10134013	NA	NA	1	1	NA	NA	NA	1	1	0	0	0	1	0	45	0.000651466	80	70	1781.72	2047.93	0	1	0	0
10134014	NA	NA	1	1	NA	NA	NA	1	1	0	0	0	0	1	39	0.0013986	100	70	1826.26	2042.08	0	1	0	0
10134015	NA	NA	1	NA	1	NA	1	1	1	0	0	0	0	1	26	0.00133402	100	70	1927.78	2028.97	0	1	0	0
10134016	NA	NA	NA	NA	NA	NA	NA	NA	NA	0	0	0	1	0	313	0.0481721	8	100	11.5097	1808.27	0	1	0	0
10134017	NA	NA	NA	NA	NA	NA	NA	NA	NA	0	0	0	0	1	60	0.00277553	10	80	1813.65	2043.71	0	1	0	0
10134018	NA	NA	NA	NA	NA	NA	NA	NA	NA	0	1	1	0	0	323	0.0421749	8	80	23.0682	1808.27	0	1	0	0
10134019	NA	NA	NA	NA	NA	NA	NA	NA	NA	0	0	0	1	0	36	0.000968992	10	100	45.6261	1808.27	0	1	0	0
10134020	NA	NA	NA	NA	NA	NA	NA	NA	NA	0	1	0	0	1	372	0.0493537	6	90	8.99276	1808.27	0	1	0	0
10134021	NA	NA	NA	NA	NA	NA	NA	NA	NA	0	2	1	0	0	94	0.0108273	6	90	45.6261	1808.27	0	1	0	0
10134022	NA	NA	NA	NA	NA	NA	NA	NA	NA	0	6	0	0	1	108	0.0100026	6	80	6.1217	1808.27	0	1	0	0
10134023	NA	NA	NA	NA	NA	NA	NA	NA	NA	0	0	0	0	1	30	0.00175582	10	80	75.7695	1808.27	0	1	0	0
10135001	NA	NA	NA	NA	NA	NA	NA	NA	NA	0	0	0	0	1	32	0.00226562	6	80	35.1325	1765.94	0	1	0	0
10135002	NA	NA	NA	NA	NA	NA	NA	NA	NA	0	0	0	0	1	27	0.00283219	6	90	35.1325	1765.94	0	1	0	0
10135003	NA	NA	NA	NA	NA	NA	NA	NA	NA	0	0	0	0	1	3	0.000266525	150	100	108.133	1716.29	0	1	0	0
10135004	NA	NA	NA	NA	NA	NA	NA	NA	NA	0	0	0	0	1	36	0.000825472	6	90	34.8906	1565.52	0	1	0	0
10135005	NA	NA	NA	NA	NA	NA	NA	NA	NA	0	0	0	0	1	29	0.00180645	8	100	51.9864	1645.51	0	1	0	0
10135006	NA	NA	NA	NA	NA	NA	NA	NA	NA	0	0	0	0	1	15	0.00148792	120	100	112.393	1719.68	0	1	0	0
10135008	NA	NA	NA	NA	NA	NA	NA	NA	NA	0	3	0	0	1	32	0.00339051	6	100	51.9864	1645.51	0	1	0	0
10135009	NA	NA	1	1	NA	NA	1	NA	1	0	0	0	0	1	17	0.00131849	60	100	1940.8	2027.48	0	1	0	0
10135010	NA	NA	NA	NA	NA	NA	NA	NA	NA	0	0	0	0	1	8	0.000109481	60	100	1980.27	2023.11	0	1	0	0
10135011	NA	NA	NA	NA	NA	NA	NA	NA	NA	0	0	0	0	1	32	0.0061849	6	100	1939.52	2027.63	0	1	0	0
10135012	NA	NA	NA	NA	NA	NA	NA	NA	NA	0	0	1	0	0	100	0.0149254	8	60	26.607	1808.27	0	1	0	0
10135013	NA	NA	NA	NA	NA	NA	NA	NA	NA	0	0	0	0	1	8	0.000141163	100	80	1980.27	2023.11	0	1	0	0
10135014	NA	NA	NA	NA	NA	NA	NA	NA	NA	0	3	1	0	0	311	0.0378257	6	100	25.0155	1808.27	0	1	0	0
10135015	1	NA	1	NA	1	NA	NA	1	NA	0	0	0	0	1	7	0.000426876	1000	100	2246.77	1993.2	0	1	0	0
10135016	NA	NA	NA	NA	NA	NA	NA	NA	NA	0	0	0	0	1	536	0.0652553	8	100	35.1901	1808.27	0	1	0	0
10135017	NA	NA	NA	NA	NA	NA	NA	NA	NA	0	0	1	0	0	490	0.0893291	8	100	35.1901	1808.27	0	1	0	0
10135018	NA	NA	NA	NA	NA	NA	NA	NA	NA	0	0	0	1	0	12	0.00140757	35	100	2042.2	2016.6	0	1	0	0
10135019	NA	NA	NA	NA	NA	NA	NA	NA	NA	0	0	0	1	0	569	0.0761148	10	90	23.8663	1808.27	0	1	0	0
10135020	NA	NA	NA	NA	NA	NA	NA	NA	NA	0	1	1	0	0	527	0.104663	6	90	18.6222	1808.27	0	1	0	0
10135021	NA	NA	NA	NA	NA	NA	NA	NA	NA	0	1	1	0	0	143	0.0286244	12	100	2076.9	2013.12	0	1	0	0
10135022	NA	NA	NA	NA	NA	NA	NA	NA	NA	0	0	1	0	0	300	0.0349247	8	100	18.3838	1808.27	0	1	0	0
10135023	NA	NA	NA	NA	NA	NA	NA	NA	NA	0	0	0	0	1	3	0.000194894	150	100	46.3161	1808.27	0	1	0	0
10136001	NA	NA	NA	NA	NA	NA	NA	NA	NA	0	1	1	0	0	300	0.0568922	6	100	159.288	1946.49	1	0	0	0
10136002	NA	NA	NA	NA	NA	NA	NA	NA	NA	0	1	1	0	0	127	0.0272772	8	100	10.7783	1808.27	0	1	0	0
10136003	NA	NA	NA	NA	NA	NA	NA	NA	NA	0	0	0	0	1	377	0.0190669	6	100	9.13584	2296.58	1	0	0	0
10136004	NA	NA	NA	NA	NA	NA	NA	NA	NA	0	0	0	1	0	283	0.0324038	10	90	92.5255	2046.22	1	0	0	0
10136005	NA	NA	NA	NA	NA	NA	NA	NA	NA	0	0	0	1	0	343	0.0306366	8	90	17.1313	2389.89	0	1	0	0
10136006	NA	NA	NA	NA	NA	NA	NA	NA	NA	3	2	0	0	1	314	0.0275772	6	95	16.3065	2272.65	0	0	1	0
10136007	NA	NA	NA	NA	NA	NA	NA	NA	NA	0	0	0	1	0	280	0.0216938	8	100	33.8968	2326.77	0	0	1	0
10136008	NA	NA	NA	NA	NA	NA	NA	NA	NA	1	0	0	1	0	176	0.00651945	12	70	73.6856	2046.46	0	1	0	0
10136009	NA	NA	NA	NA	NA	NA	NA	NA	NA	1	0	1	0	0	701	0.0927426	8	100	18.4087	1808.27	0	0	1	0
10136010	NA	NA	NA	NA	NA	NA	NA	NA	NA	0	0	0	1	0	114	0.00740584	15	80	101.375	2025.4	1	0	0	0
10136011	NA	NA	NA	NA	NA	NA	NA	NA	NA	0	1	0	1	0	753	0.125722	6	100	18.3175	1808.27	0	1	0	0
10136012	NA	NA	NA	NA	NA	NA	NA	NA	NA	0	4	1	0	0	705	0.151269	6	100	6.81144	1808.27	0	1	0	0
10136013	NA	NA	NA	NA	NA	NA	NA	NA	NA	0	5	1	0	0	393	0.0577312	6	100	110.123	2008.19	0	1	0	0
10136014	NA	NA	NA	NA	NA	NA	NA	NA	NA	0	2	1	0	0	443	0.0657801	6	90	127.91	1980.37	1	0	0	0
10136015	NA	NA	NA	NA	NA	NA	NA	NA	NA	0	1	1	0	0	445	0.0541872	8	100	152.439	1952.67	0	1	0	0
10136016	NA	NA	NA	NA	NA	NA	NA	NA	NA	0	0	0	0	1	79	0.00192406	20	80	135.553	1970.72	1	0	0	0
10136017	NA	NA	NA	NA	NA	NA	NA	NA	NA	0	0	0	1	0	64	0.00152964	25	75	236.691	1901.27	1	0	0	0
10136018	NA	NA	NA	NA	NA	NA	NA	NA	NA	0	1	1	0	0	403	0.0599087	8	100	69.9201	1808.27	0	1	0	0
10136019	NA	NA	NA	NA	NA	NA	NA	NA	NA	0	0	1	0	0	590	0.0552319	8	90	45.1846	1808.27	0	1	0	0
10136020	NA	NA	NA	NA	NA	NA	NA	NA	NA	0	0	1	0	0	630	0.0729012	8	100	23.3523	1808.27	0	1	0	0
10136021	NA	NA	NA	NA	NA	NA	NA	NA	NA	0	0	1	0	0	795	0.123303	8	100	39.9975	1808.27	0	1	0	0
10136022	NA	NA	NA	NA	NA	NA	NA	NA	NA	0	0	1	0	0	116	0.00649422	10	100	71.8796	1808.27	0	1	0	0
10137001	NA	NA	NA	NA	NA	NA	NA	NA	NA	0	0	0	0	1	23	0.00127779	36	80	541.676	1746.34	1	0	0	0
10137002	NA	NA	NA	NA	NA	NA	NA	NA	NA	2	2	0	0	1	40	0.00306498	6	80	443.252	1811.42	0	1	0	0
10137003	NA	NA	NA	NA	NA	NA	NA	NA	NA	0	2	0	0	1	49	0.000435035	7	100	12.1577	1281.27	1	0	0	0
10137004	NA	NA	NA	NA	NA	NA	NA	NA	NA	0	3	0	0	1	55	0.00352478	6	95	4.47657	1579.68	0	1	0	0
10137005	NA	NA	NA	NA	NA	NA	NA	NA	NA	0	1	1	0	0	276	0.1051	6	100	1.49917	1385.49	0	1	0	0
10137006	NA	NA	NA	NA	NA	NA	NA	NA	NA	0	1	1	0	0	197	0.0214054	7	85	17.9383	1808.27	0	1	0	0
10137007	NA	NA	NA	NA	NA	NA	NA	NA	NA	0	0	1	0	0	119	0.0112963	7	100	98.393	1808.27	0	1	0	0
10137008	NA	NA	NA	NA	NA	NA	NA	NA	NA	0	1	1	0	0	275	0.054612	6	60	13.2272	1808.27	0	1	0	0
10137009	NA	NA	NA	NA	NA	NA	NA	NA	NA	0	2	0	1	0	272	0.0376731	7	55	43.2656	1808.27	1	0	0	0
10137010	NA	NA	NA	NA	NA	NA	NA	NA	NA	0	0	0	0	1	166	0.0136757	6	70	11.002	1808.27	0	1	0	0
10137011	NA	NA	NA	NA	NA	NA	NA	NA	NA	0	0	0	0	1	217	0.021131	6	80	9.45477	1808.27	0	1	0	0
10137012	NA	NA	NA	NA	NA	NA	NA	NA	NA	0	2	0	1	0	314	0.0293859	7	65	27.9671	1808.27	0	1	0	0
10137013	NA	NA	NA	NA	NA	NA	NA	NA	NA	0	0	0	0	1	80	0.00285972	7	55	69.8116	1808.27	0	1	0	0
10137014	NA	NA	NA	NA	NA	NA	NA	NA	NA	0	0	0	0	1	238	0.0194484	7	50	69.8116	1808.27	0	1	0	0
10137015	NA	NA	NA	NA	NA	NA	NA	NA	NA	0	0	0	1	0	61	0.0012635	39	65	403.932	1862.28	0	1	0	0
10137016	NA	NA	NA	NA	NA	NA	NA	NA	NA	0	1	0	1	0	262	0.0264317	7	60	282.364	1886.22	0	1	0	0
10137017	NA	NA	NA	NA	NA	NA	NA	NA	NA	0	0	0	1	0	142	0.0166779	7	67.5	293.783	1882.52	0	1	0	0
10137018	NA	NA	NA	NA	NA	NA	NA	NA	NA	0	0	1	0	0	241	0.0540314	6	85	9.75603	1787.82	0	1	0	0
10137019	NA	NA	NA	NA	NA	NA	NA	NA	NA	0	0	1	0	0	63	0.0022845	23	85	269.452	1889.96	0	1	0	0
10137020	NA	NA	NA	NA	NA	NA	NA	NA	NA	0	1	1	0	0	184	0.0232781	6	90	15.9234	1808.27	0	1	0	0
10137021	NA	NA	NA	NA	NA	NA	NA	NA	NA	0	1	0	0	1	314	0.056878	6	60	7.57029	1808.27	0	1	0	0
10137022	NA	NA	NA	NA	NA	NA	NA	NA	NA	0	0	1	0	0	87	0.0230769	6	100	269.452	1889.96	0	1	0	0
10137023	NA	NA	NA	NA	NA	NA	NA	NA	NA	0	0	0	1	0	48	0.000679348	25	100	294.555	1882.32	0	1	0	0
10137024	NA	NA	NA	NA	NA	NA	NA	NA	NA	0	1	0	0	1	120	0.0378895	74	100	3.29926	1808.27	0	1	0	0
10137025	NA	NA	NA	NA	NA	NA	NA	NA	NA	0	0	0	1	0	43	0.000734035	6	90	404.948	1861.31	0	1	0	0
10137026	NA	NA	NA	NA	NA	NA	NA	NA	NA	0	0	0	0	1	42	0.000223164	37	100	431.843	1827.47	0	1	0	0
10137027	NA	NA	NA	NA	NA	NA	NA	NA	NA	0	0	0	0	1	46	0.00345501	17	85	444.2	1810.11	0	1	0	0
10137028	NA	NA	NA	NA	NA	NA	NA	NA	NA	0	3	0	1	0	282	0.0247997	7	65	17.5585	1748.05	0	1	0	0
10137029	NA	NA	NA	NA	NA	NA	NA	NA	NA	0	0	1	0	0	56	0.0052892	7	80	78.8253	1515.82	0	1	0	0
10137030	NA	NA	NA	NA	NA	NA	NA	NA	NA	0	0	0	1	0	128	0.0238095	6	52.5	29.7209	1637.9	0	1	0	0
10137031	NA	NA	NA	NA	NA	NA	NA	NA	NA	0	2	1	0	0	326	0.0325269	7	70	9.37145	1701.42	0	1	0	0
10137032	NA	NA	NA	NA	NA	NA	NA	NA	NA	0	2	0	0	1	258	0.022703	7	60	23.2788	1697.22	0	1	0	0
10137033	NA	NA	NA	NA	NA	NA	NA	NA	NA	0	0	0	0	1	45	0.00443459	6	55	78.8253	1515.82	0	1	0	0
10137034	NA	NA	NA	NA	NA	NA	NA	NA	NA	0	0	0	0	1	26	0.000160823	12	100	113.252	1421.55	0	1	0	0
10137035	NA	NA	NA	NA	NA	NA	NA	NA	NA	0	1	0	0	1	39	0.00195856	7	100	21.0424	1205.23	0	1	0	0
10137036	NA	NA	1	NA	NA	NA	1	NA	1	0	0	0	0	1	183	0.0307531	6	60	33.0216	1551.85	0	1	0	0
10137037	NA	NA	NA	NA	NA	NA	NA	NA	NA	0	0	0	0	1	388	0.039	15	100	566.184	1724.39	0	1	0	0
10138001	NA	NA	NA	NA	NA	NA	NA	NA	NA	0	0	1	0	0	193	0.0388391	7	80	16.2337	1808.27	0	0	1	0
10138002	NA	NA	NA	NA	NA	NA	NA	NA	NA	0	1	1	0	0	92	0.0180293	7	95	81.0419	1808.27	0	0	1	0
10138003	NA	NA	NA	NA	NA	NA	NA	NA	NA	0	1	0	0	1	45	0.0117082	8	60	3.74557	1808.27	1	0	0	0
10138004	NA	NA	NA	NA	NA	NA	NA	NA	NA	0	1	0	0	1	61	0.0179257	7	77.5	11.1891	1808.27	0	0	1	0
10138005	NA	NA	NA	NA	NA	NA	NA	NA	NA	0	2	0	0	1	64	0.00902693	9	80	16.6979	1808.27	0	1	0	0
10138006	NA	NA	NA	NA	NA	NA	NA	NA	NA	0	0	0	0	1	6	0	122	80	58.8141	1808.27	0	1	0	0
10138007	NA	NA	NA	NA	NA	NA	NA	NA	NA	0	0	1	0	0	105	0.0127975	14	70	8.05525	1808.27	0	1	0	0
10138008	NA	NA	NA	NA	NA	NA	NA	NA	NA	0	0	0	0	1	7	0.00133749	130	70	86.2941	1808.27	1	0	0	0
10138009	NA	NA	NA	NA	NA	NA	NA	NA	NA	0	2	0	0	1	18	0.0012131	9	90	847.727	1720.85	1	0	0	0
10138010	NA	NA	NA	NA	NA	NA	NA	NA	NA	0	2	0	0	1	22	0.00508352	7	90	54.3235	1808.27	1	0	0	0
10138011	NA	NA	NA	NA	NA	NA	NA	NA	NA	0	0	0	1	0	131	0.0187266	8	60	8.82755	1808.27	1	0	0	0
10138012	NA	NA	NA	NA	NA	NA	NA	NA	NA	0	0	0	0	1	118	0.014874	8	70	740.392	1712.93	0	0	1	0
10138013	NA	NA	NA	NA	NA	NA	NA	NA	NA	1	1	1	0	0	129	0.0191397	8	65	43.2598	1553.1	1	0	0	0
10138014	NA	NA	NA	NA	NA	NA	NA	NA	NA	0	0	0	0	1	62	0.0117572	7	85	24.6901	1699.92	1	0	0	0
10138015	NA	NA	NA	NA	NA	NA	NA	NA	NA	0	0	0	1	0	68	0.00376086	8	70	33.3278	1605.7	0	1	0	0
10138016	NA	NA	NA	NA	NA	NA	NA	NA	NA	0	3	0	1	0	57	0.00693282	7	65	33.3278	1605.7	1	0	0	0
10138017	NA	NA	NA	NA	NA	NA	NA	NA	NA	0	0	0	1	0	28	0.00128667	7	92.5	45.8446	1533.5	1	0	0	0
10138018	NA	NA	NA	NA	NA	NA	NA	NA	NA	0	0	1	0	0	135	0.0138217	8	80	15.7401	1808.27	0	1	0	0
10138019	NA	NA	NA	NA	NA	NA	NA	NA	NA	0	0	0	1	0	54	0.000818867	8	72.5	104.928	1808.18	1	0	0	0
10138020	NA	NA	NA	NA	NA	NA	NA	NA	NA	0	1	0	0	1	138	0.0127329	6	55	30.5251	1808.27	0	0	1	0
10138021	NA	NA	NA	NA	NA	NA	NA	NA	NA	1	0	0	1	0	163	0.00949856	6	67.5	11.6037	1808.27	0	0	1	0
10138022	NA	NA	NA	NA	NA	NA	NA	NA	NA	0	1	0	0	1	120	0.00269906	8	67.5	30.5251	1808.27	0	0	1	0
10138023	NA	NA	NA	NA	NA	NA	NA	NA	NA	0	1	1	0	0	98	0.00342902	8	75	70.0839	1808.27	0	1	0	0
10138024	NA	NA	NA	NA	NA	NA	NA	NA	NA	0	1	0	1	0	159	0.0125401	8	87.5	54.7063	1808.27	0	0	1	0
10138025	NA	NA	NA	NA	NA	NA	NA	NA	NA	0	0	0	0	1	63	0.00266889	8	67.5	114.097	1769.67	1	0	0	0
10138026	NA	NA	NA	NA	NA	NA	NA	NA	NA	0	0	1	0	0	302	0.04567	6	80	11.3131	1808.27	0	1	0	0
10138027	NA	NA	NA	NA	NA	NA	NA	NA	NA	1	0	0	0	1	31	0.00324594	6	82.5	165.009	1686.81	0	1	0	0
10138028	NA	NA	NA	NA	NA	NA	NA	NA	NA	0	0	0	0	1	18	0.00209479	6	85	734.73	1713.88	0	1	0	0
10138029	NA	NA	NA	NA	NA	NA	NA	NA	NA	0	0	0	0	1	8	0	19	87.5	780.232	1713.29	0	1	0	0
10138030	NA	NA	NA	NA	NA	NA	NA	NA	NA	0	0	0	0	1	8	0.000473261	40	90	820.797	1717.98	1	0	0	0
10138031	NA	NA	NA	NA	NA	NA	NA	NA	NA	1	0	0	0	1	5	0.00040328	51	90	3116.94	1917.8	0	1	0	0
10138032	NA	NA	NA	NA	NA	NA	NA	NA	NA	0	1	0	0	1	30	0.00177553	8	85	777.776	1712.99	0	1	0	0
10138033	NA	NA	NA	NA	NA	NA	NA	NA	NA	0	2	0	0	1	25	0.00206772	8	80	799.044	1715.52	0	1	0	0
10138034	NA	NA	NA	NA	NA	NA	NA	NA	NA	0	1	0	0	1	29	0.00120089	8	90	12.6912	1808.27	0	1	0	0
10138035	NA	NA	NA	NA	NA	NA	NA	NA	NA	0	0	0	0	1	22	0.000964878	8	80	820.302	1717.93	0	1	0	0
10138036	NA	NA	NA	NA	NA	NA	NA	NA	NA	0	6	0	0	1	33	0.00303448	8	90	829.038	1718.87	0	1	0	0
10138037	NA	NA	NA	NA	NA	NA	NA	NA	NA	0	1	0	0	1	30	0.00243457	8	90	861.158	1722.22	0	1	0	0
10139001	NA	NA	NA	NA	1	NA	NA	NA	NA	0	0	0	0	1	3	0.000363769	80	95	9142.18	2718.85	1	0	0	0
10139002	NA	NA	NA	NA	NA	NA	NA	NA	NA	0	2	0	0	1	256	0.0647424	6	100	5.56031	1808.27	0	0	1	0
10139003	NA	NA	NA	1	NA	NA	NA	NA	NA	0	0	0	0	1	16	0.00175483	50	90	3374.03	1909.46	0	0	1	0
10139004	NA	NA	NA	NA	NA	NA	NA	NA	NA	0	0	1	0	0	115	0.0176715	8	100	21.6166	1808.27	0	0	1	0
10139005	NA	NA	NA	NA	NA	NA	NA	NA	NA	0	0	0	1	0	4	0.000336814	200	90	3216.27	1914.42	1	0	0	0
10139006	NA	NA	NA	NA	NA	NA	NA	NA	NA	0	0	0	0	1	434	0.0725397	8	100	21.6768	1808.27	0	1	0	0
10139007	NA	NA	NA	NA	NA	NA	NA	NA	NA	0	1	0	0	1	5	0.000284981	200	90	33.7456	1808.27	0	1	0	0
10139008	NA	NA	NA	NA	NA	NA	NA	NA	NA	0	0	0	0	1	303	0.101805	8	90	5.99985	1808.27	0	1	0	0
10139009	NA	NA	NA	NA	NA	NA	NA	NA	NA	0	0	1	0	0	386	0.0556286	8	90	16.9276	1808.27	0	1	0	0
10139010	NA	NA	NA	NA	NA	NA	NA	NA	NA	0	0	0	0	1	491	0.0996917	8	90	44.1396	1808.27	1	0	0	0
10139011	NA	NA	NA	NA	NA	NA	NA	NA	NA	0	0	0	1	0	68	0.0190217	8	90	32.5728	1808.27	1	0	0	0
10139012	NA	NA	NA	NA	NA	NA	NA	NA	NA	0	0	0	1	0	5	0.000634518	400	90	54.6629	1808.27	1	0	0	0
10139013	NA	NA	NA	NA	NA	NA	NA	NA	NA	0	0	0	0	1	5	0.000100241	1500	95	3332.4	1910.72	1	0	0	0
10139014	NA	NA	1	NA	1	NA	NA	NA	NA	0	0	0	1	0	4	0.000213904	1100	95	9154.24	2717.64	0	1	0	0
10140001	NA	NA	NA	NA	NA	NA	NA	NA	NA	0	0	0	1	0	227	0.0620671	7	90	277.225	1813.21	0	1	0	0
10140002	NA	NA	NA	NA	NA	NA	NA	NA	NA	0	1	0	0	1	89	0.0274959	7	90	264.119	1813.45	0	0	1	0
10140003	NA	NA	NA	NA	NA	NA	NA	NA	NA	0	1	0	0	1	191	0.0430007	7	85	8.46879	1808.27	0	1	0	0
10140004	NA	NA	NA	NA	NA	NA	NA	NA	NA	0	0	0	0	1	7	0.000190476	20	50	27.114	1808.27	0	0	1	0
10140005	NA	NA	NA	NA	NA	NA	NA	NA	NA	0	0	1	0	0	75	0.00911809	15	75	22.7792	1808.27	0	1	0	0
10140006	NA	NA	NA	NA	NA	NA	NA	NA	NA	0	0	1	0	0	466	0.0534075	8	72.5	12.6296	1808.27	0	1	0	0
10140007	NA	NA	NA	NA	NA	NA	NA	NA	NA	0	1	1	0	0	447	0.078259	7	87.5	6.98503	1808.27	0	1	0	0
10140008	NA	NA	NA	NA	NA	NA	NA	NA	NA	0	2	0	0	1	344	0.0620397	7	62.5	76.6238	1826.13	0	0	1	0
10140009	NA	NA	NA	NA	NA	NA	NA	NA	NA	0	0	0	1	0	354	0.0814815	7	85	61.8187	1830.42	0	1	0	0
10140010	NA	NA	NA	NA	NA	NA	NA	NA	NA	0	1	0	1	0	549	0.0550431	8	100	40.9148	1841.74	0	1	0	0
10140011	NA	NA	NA	NA	NA	NA	NA	NA	NA	0	0	0	0	1	580	0.0604538	8	100	15.3064	1873.28	0	1	0	0
10140012	NA	NA	NA	NA	NA	NA	NA	NA	NA	0	0	0	0	1	231	0.0142151	7	100	28.0602	1845.61	0	1	0	0
10140013	NA	NA	NA	NA	NA	NA	NA	NA	NA	0	0	1	0	0	180	0.00282486	12	95	61.8187	1830.42	0	1	0	0
10140014	NA	NA	NA	NA	NA	NA	NA	NA	NA	0	0	1	0	0	191	0.012671	12	100	113.979	1820.28	0	1	0	0
10140015	NA	NA	NA	NA	NA	NA	NA	NA	NA	0	0	0	0	1	541	0.12483	7	100	45.622	1838.29	0	1	0	0
10140016	NA	NA	NA	NA	NA	NA	NA	NA	NA	0	0	0	1	0	74	0.0100233	12	100	129.233	1818.86	0	0	1	0
10140017	NA	NA	NA	NA	NA	NA	NA	NA	NA	0	0	1	0	0	365	0.0492068	8	75	9.89789	1808.27	0	0	1	0
10140018	NA	NA	NA	NA	NA	NA	NA	NA	NA	0	0	0	1	0	29	0.00358691	17	50	162.922	1816.67	0	0	1	0
10140019	NA	NA	NA	NA	NA	NA	NA	NA	NA	0	0	0	1	0	5	0.000340426	200	100	273.244	1813.28	0	0	1	0
10140020	NA	NA	NA	NA	NA	NA	NA	NA	NA	0	0	0	1	0	3	0.000154775	220	100	9469.39	2687.41	0	1	0	0
10140021	NA	NA	NA	NA	NA	NA	NA	NA	NA	0	0	1	0	0	453	0.0826758	7	100	8.10454	1808.27	0	1	0	0
10140022	NA	NA	NA	NA	NA	NA	NA	NA	NA	0	1	1	0	0	517	0.0820027	7	100	8.10454	1808.27	0	1	0	0
10140023	NA	NA	NA	NA	NA	NA	NA	NA	NA	0	1	1	0	0	213	0.020034	8	100	22.0713	1808.27	0	1	0	0
10140024	NA	NA	NA	NA	NA	NA	NA	NA	NA	0	0	1	0	0	93	0.014322	8	91	50.025	1808.27	0	0	1	0
10140025	NA	1	NA	1	NA	NA	NA	NA	NA	0	0	1	0	0	334	0.0597645	7	100	4.63727	1808.27	0	1	0	0
10140026	NA	NA	NA	NA	NA	NA	NA	NA	NA	0	0	1	0	0	440	0.0935687	7	100	3.89982	1808.27	0	1	0	0
10140027	NA	NA	NA	NA	NA	NA	NA	NA	NA	0	0	1	0	0	413	0.0746381	8	100	10.9339	1808.27	0	1	0	0
10140028	NA	NA	NA	NA	NA	NA	NA	NA	NA	0	0	1	0	0	424	0.0616486	6	90	8.50151	1808.27	0	1	0	0
10140029	NA	NA	NA	NA	NA	NA	NA	NA	NA	0	0	0	1	0	16	0.0025812	50	50	229.822	1814.23	0	1	0	0
10140030	NA	NA	NA	NA	NA	NA	NA	NA	NA	0	0	0	0	1	386	0.0389001	12	100	13.7573	1808.27	0	0	1	0
10140031	NA	NA	NA	NA	NA	NA	NA	NA	NA	0	0	0	1	0	21	0.00384382	30	75	258.252	1813.57	0	1	0	0
10140032	NA	NA	NA	NA	NA	NA	NA	NA	NA	0	0	0	0	1	12	0.002094	37	35	273.184	1813.28	0	1	0	0
10140033	NA	NA	NA	NA	NA	NA	NA	NA	NA	0	0	1	0	0	14	0.00202355	110	30	289.932	1812.99	0	1	0	0
10140034	NA	NA	NA	NA	NA	NA	NA	NA	NA	0	0	0	0	1	11	0.00181365	91	40	300.5	1812.83	0	1	0	0
10141001	NA	NA	NA	NA	NA	NA	NA	NA	NA	0	1	1	0	0	465	0.0485584	8	100	305.875	1826.37	0	0	1	0
10141002	NA	NA	NA	NA	NA	NA	NA	NA	NA	0	1	1	0	0	590	0.0669872	8	95	22.7791	1929.52	0	0	1	0
10141003	NA	NA	NA	NA	NA	NA	NA	NA	NA	0	2	1	0	0	454	0.0368498	8	80	11.9112	1934.4	0	0	1	0
10141004	NA	NA	NA	NA	NA	NA	NA	NA	NA	0	3	1	0	0	374	0.0347077	7	100	108.114	1828.25	0	1	0	0
10141005	NA	NA	NA	NA	NA	NA	NA	NA	NA	0	3	0	0	1	519	0.0529112	7	90	10.0504	1808.27	0	0	1	0
10141006	NA	NA	NA	NA	NA	NA	NA	NA	NA	0	1	0	0	1	631	0.0907496	7	90	4.55061	1808.27	0	0	1	0
10141007	NA	NA	NA	NA	NA	NA	NA	NA	NA	0	0	1	0	0	269	0.00668151	8	97.5	43.5464	1811.85	0	0	1	0
10141008	NA	NA	NA	NA	NA	NA	NA	NA	NA	0	0	1	0	0	709	0.107544	7	95	16.3895	1808.27	0	0	1	0
10141009	NA	NA	NA	NA	NA	NA	NA	NA	NA	0	0	1	0	0	582	0.0872613	7	90	34.5039	1808.27	0	0	1	0
10141010	NA	NA	NA	NA	NA	NA	NA	NA	NA	0	0	0	0	1	796	0.0430283	8	100	13.1609	1808.27	1	0	0	0
10141011	NA	NA	NA	NA	NA	NA	NA	NA	NA	0	0	0	0	1	725	0.031671	8	100	17.462	1808.27	1	0	0	0
10141012	NA	NA	NA	NA	NA	NA	NA	NA	NA	0	0	0	0	1	481	0.0478088	7	100	44.7666	1808.72	1	0	0	0
10141013	NA	NA	NA	NA	NA	NA	NA	NA	NA	0	0	0	0	1	546	0.039732	8	100	44.7406	1808.72	1	0	0	0
10141014	NA	NA	NA	NA	NA	NA	NA	NA	NA	0	0	1	0	0	296	0.0118147	13	100	111.25	1831.76	1	0	0	0
10141015	NA	NA	NA	NA	NA	NA	NA	NA	NA	0	0	1	0	0	183	0.00102259	15	100	136.595	1846.51	1	0	0	0
10141016	NA	NA	NA	NA	NA	NA	NA	NA	NA	0	0	0	1	0	172	0.000539884	25	95	202.496	1849.27	0	1	0	0
10141017	NA	NA	NA	NA	NA	NA	NA	NA	NA	0	0	0	1	0	254	0.0221502	7	95	2.32645	1952.97	0	1	0	0
10141018	NA	NA	NA	NA	NA	NA	NA	NA	NA	0	0	1	0	0	203	0.00958904	7	80	169.565	1862.86	0	1	0	0
10141019	NA	NA	NA	NA	NA	NA	NA	NA	NA	0	0	0	1	0	249	0.0145623	8	100	13.1065	1636.87	0	1	0	0
10141020	NA	NA	NA	NA	NA	NA	NA	NA	NA	0	0	1	0	0	164	0.00420168	20	90	371.715	1830.66	0	0	1	0
10141021	NA	NA	NA	NA	NA	NA	NA	NA	NA	0	0	1	0	0	274	0.0129764	8	85	32.6072	1503.77	0	0	1	0
10141022	NA	NA	NA	NA	NA	NA	NA	NA	NA	0	0	1	0	0	235	0.00663577	8	100	38.5803	1873.21	0	1	0	0
10141023	NA	NA	NA	NA	NA	NA	NA	NA	NA	0	0	0	0	1	172	0.00227828	8	100	85.3023	1745.19	0	1	0	0
10142001	NA	NA	1	NA	NA	NA	1	NA	NA	0	0	1	0	0	2	0.000143575	341	55	629.083	1835.23	0	1	0	0
10142002	NA	NA	NA	NA	NA	NA	NA	NA	NA	0	2	1	0	0	177	0.041748	6	90	585.497	1837.23	0	1	0	0
10142003	NA	NA	NA	NA	NA	NA	NA	NA	NA	0	0	0	1	0	591	0.0763889	8	100	13.5268	1808.27	0	1	0	0
10142004	NA	NA	NA	NA	NA	NA	NA	NA	NA	0	0	0	0	1	75	0.0223611	20	60	573.611	1837.83	0	1	0	0
10142005	NA	NA	NA	NA	NA	NA	NA	NA	NA	0	1	0	1	0	569	0.197995	7	87.5	551.344	1839.03	0	0	1	0
10142006	NA	NA	NA	NA	NA	NA	NA	NA	NA	0	1	1	0	0	485	0.215103	10	100	536.485	1839.88	0	0	1	0
10142007	NA	NA	NA	NA	NA	NA	NA	NA	NA	0	0	0	1	0	560	0.0747894	8	55	528.88	1840.33	0	1	0	0
10142008	NA	NA	NA	NA	NA	NA	NA	NA	NA	0	2	1	0	0	500	0.0405682	8	100	16.6193	1808.41	0	0	1	0
10142009	NA	NA	NA	NA	NA	NA	NA	NA	NA	0	0	1	0	0	162	0.0286856	12	100	28.9763	1808.35	0	0	1	0
10142010	NA	NA	NA	NA	NA	NA	NA	NA	NA	0	0	0	0	1	454	0.0865529	6	100	7.24385	1808.27	0	0	1	0
10142011	NA	NA	NA	NA	NA	NA	NA	NA	NA	0	1	1	0	0	314	0.0745946	6	100	435.746	1842.85	0	0	1	0
10142012	NA	NA	NA	NA	NA	NA	NA	NA	NA	0	0	0	0	1	599	0.0430751	8	80	31.6191	1808.27	0	1	0	0
10142013	NA	NA	NA	NA	NA	NA	NA	NA	NA	0	0	0	1	0	505	0.0459852	6	100	31.1483	1808.27	0	1	0	0
10142014	NA	NA	NA	NA	NA	NA	NA	NA	NA	0	0	0	1	0	313	0.0187696	11	100	58.2485	1839.18	0	1	0	0
10142015	NA	NA	NA	NA	NA	NA	NA	NA	NA	0	1	0	1	0	575	0.0704724	8	82.5	8.86006	1808.27	0	0	1	0
10142016	NA	NA	NA	NA	NA	NA	NA	NA	NA	0	0	0	0	1	171	0.0127698	20	100	388.652	1835.93	0	1	0	0
10142017	NA	NA	NA	NA	NA	NA	NA	NA	NA	0	0	1	0	0	498	0.114618	8	90	375.672	1831.89	0	0	1	0
10142018	NA	NA	NA	NA	NA	NA	NA	NA	NA	0	0	0	1	0	101	0.00493479	27	100	424.717	1843.75	0	0	1	0
10142019	NA	NA	NA	NA	NA	NA	NA	NA	NA	0	2	1	0	0	383	0.0609334	6	92.5	388.652	1835.93	0	1	0	0
10142020	NA	NA	NA	NA	NA	NA	NA	NA	NA	0	0	1	0	0	94	0.0280317	6	100	397.049	1838.41	0	0	1	0
10142021	NA	NA	NA	NA	NA	NA	NA	NA	NA	0	0	1	0	0	391	0.0835041	6	100	2.56044	1952.97	0	0	1	0
10142022	NA	NA	NA	NA	NA	NA	NA	NA	NA	0	1	1	0	0	494	0.142669	6	100	405.596	1840.47	0	0	1	0
10142023	NA	NA	NA	NA	NA	NA	NA	NA	NA	0	0	1	0	0	187	0.0138904	8	100	14.4623	1945.43	0	1	0	0
10142024	NA	NA	NA	NA	NA	NA	NA	NA	NA	0	0	1	0	0	70	0.00625072	23	90	468.388	1840.44	0	1	0	0
10142025	NA	NA	NA	NA	NA	NA	NA	NA	NA	0	0	1	0	0	131	0.00618812	8	92.5	16.088	1897.41	0	1	0	0
10142026	NA	NA	NA	NA	NA	NA	NA	NA	NA	0	0	0	1	0	95	0.00982099	12	100	508.706	1841.6	0	1	0	0
10142027	NA	NA	NA	NA	NA	NA	NA	NA	NA	0	1	1	0	0	231	0.0479216	6	100	25.7195	1880.53	0	1	0	0
10142028	NA	NA	NA	1	NA	NA	NA	NA	NA	0	1	0	1	0	238	0.042367	6	100	30.7042	1869.77	0	0	1	0
10142029	NA	NA	NA	NA	NA	NA	NA	NA	NA	0	0	0	1	0	242	0.063481	6	100	5.5312	1808.27	0	1	0	0
10142030	NA	NA	NA	NA	NA	NA	NA	NA	NA	0	0	1	0	0	20	0.000245128	60	90	538.413	1839.77	0	1	0	0
10142031	NA	NA	NA	NA	NA	NA	NA	NA	NA	0	1	0	0	1	17	0.00406607	6	77.5	519.614	1840.91	0	1	0	0
10142032	NA	1	NA	NA	NA	NA	NA	NA	NA	1	0	1	0	0	18	0.00138365	114	67.5	573.611	1837.83	0	0	1	0
10142033	NA	NA	NA	NA	NA	NA	NA	NA	NA	0	0	1	0	0	5	0.000641643	113	60	606.603	1836.23	0	1	0	0
10142034	NA	NA	NA	NA	NA	NA	NA	NA	NA	0	0	0	1	0	300	0.0709662	6	90	592.999	1836.87	0	1	0	0
10142035	NA	NA	NA	NA	NA	NA	NA	NA	NA	0	1	0	1	0	197	0.0126292	6	90	598.322	1836.61	0	1	0	0
10143001	NA	NA	NA	NA	NA	NA	NA	NA	NA	0	0	1	0	0	213	0.0741135	6	90	3.25312	1808.27	0	1	0	0
10143002	NA	NA	NA	NA	NA	NA	NA	NA	NA	0	0	1	0	0	613	0.11299	8	95	7.00744	1808.27	0	0	1	0
10143003	NA	NA	NA	NA	NA	NA	NA	NA	NA	0	0	1	0	0	612	0.129101	6	90	102.61	1808.27	0	0	1	0
10143004	NA	NA	NA	NA	NA	NA	NA	NA	NA	0	0	0	0	1	659	0.085447	8	100	16.8655	1808.27	0	0	1	0
10143005	NA	NA	NA	NA	NA	NA	NA	NA	NA	0	0	0	0	1	186	0.0187587	8	90	84.6024	1808.27	0	0	1	0
10143006	NA	NA	NA	NA	NA	NA	NA	NA	NA	0	0	0	0	1	673	0.0669516	8	100	7.85661	1808.27	0	0	1	0
10143007	NA	NA	NA	NA	NA	NA	NA	NA	NA	0	0	0	0	1	306	0.0328082	8	90	31.8288	1808.27	0	0	1	0
10143008	NA	NA	NA	NA	NA	NA	NA	NA	NA	0	0	0	0	1	367	0.110814	8	100	31.8288	1808.27	0	0	1	0
10143009	NA	NA	NA	NA	NA	NA	NA	NA	NA	0	0	0	0	1	664	0.189421	6	90	37.9107	1808.27	0	0	1	0
10143010	NA	NA	NA	NA	NA	NA	NA	NA	NA	0	0	1	0	0	34	0.000774893	78	70	84.6024	1808.27	0	0	1	0
10143011	NA	NA	NA	NA	NA	NA	NA	NA	NA	0	0	0	0	1	9	0.00064433	37	82.5	119.975	1808.27	0	0	1	0
10143012	NA	NA	NA	NA	NA	NA	NA	NA	NA	0	0	0	0	1	494	0.0913353	8	90	92.5409	1808.27	0	0	1	0
10143013	NA	NA	NA	NA	NA	NA	NA	NA	NA	0	0	1	0	0	3	9.95e-05	514	80	127.098	1808.27	0	1	0	0
10143014	NA	NA	NA	NA	NA	NA	NA	NA	NA	0	0	1	0	0	259	0.0479386	8	87.5	13.9359	1808.27	0	1	0	0
10143015	NA	NA	NA	NA	NA	NA	NA	NA	NA	0	0	0	0	1	193	0.0690691	52	60	5.04834	1808.27	0	1	0	0
10144001	NA	NA	NA	1	1	NA	NA	NA	NA	0	0	1	0	0	4	0.000250532	256	35	5759.69	3197.24	0	1	0	0
10144002	NA	NA	NA	NA	1	NA	NA	NA	NA	0	0	0	0	1	2	0.000180148	843	62.5	10113.5	2632.91	0	1	0	0
10144003	NA	NA	NA	NA	NA	NA	NA	NA	NA	0	0	0	1	0	3	0.000155497	692	77.5	10187.3	2626.92	0	1	0	0
10144004	NA	NA	NA	NA	NA	NA	NA	NA	NA	0	0	0	0	1	215	0.0356902	268	90	10112.3	2633	0	0	1	0
10144005	NA	NA	NA	NA	NA	NA	NA	NA	NA	0	0	0	0	1	366	0.0378764	8	100	39.056	1808.27	1	0	0	0
10144006	NA	NA	NA	NA	NA	NA	NA	NA	NA	0	0	0	0	1	115	0.0306262	9	100	14.6403	1808.27	1	0	0	0
10144007	NA	NA	NA	NA	NA	NA	NA	NA	NA	0	0	0	0	1	3	0.000517063	191	95	10172.1	2628.14	0	1	0	0
10300001	NA	NA	NA	NA	NA	NA	NA	NA	NA	0	0	0	0	1	1302	0.054944	5	100	66.6579	3946.34	0	0	0	1
10300002	NA	NA	NA	NA	NA	NA	NA	NA	NA	0	0	0	0	1	1031	0.0949899	5	100	66.6579	3946.34	0	0	0	1
10300003	NA	NA	NA	NA	NA	NA	NA	NA	NA	0	0	0	0	1	703	0.0191922	14	100	147.086	5629.74	0	0	0	1
10300004	NA	NA	NA	NA	NA	NA	NA	NA	NA	0	0	0	0	1	1168	0.307121	5	100	3.15569	4902.33	0	0	0	1
10300005	NA	NA	NA	NA	NA	NA	NA	NA	NA	0	0	0	0	1	1423	0.107797	10	100	16.5918	4960.61	0	0	0	1
10300006	NA	NA	NA	NA	NA	NA	NA	NA	NA	0	0	0	0	1	1348	0.0813987	10	100	17.7698	4960.61	0	0	0	1
10300007	NA	NA	NA	NA	NA	NA	NA	NA	NA	0	0	0	0	1	787	0.0459721	14	100	52.4126	4960.25	0	0	0	1
10300008	NA	NA	NA	NA	NA	NA	NA	NA	NA	0	0	0	0	1	464	0.022154	20	65	229.713	5099.16	0	0	0	1
10300009	NA	NA	NA	NA	NA	NA	NA	NA	NA	0	0	0	0	1	1483	0.0913416	12	100	25.486	4999.86	0	0	1	0
10300010	NA	NA	NA	NA	NA	NA	NA	NA	NA	0	0	0	0	1	925	0.0684708	13	100	4.7529	4960.61	0	0	1	0
10300011	NA	NA	NA	NA	NA	NA	NA	NA	NA	0	0	0	0	1	715	0.0315194	10	93.5	52.0831	5972.3	0	0	0	1
10300012	NA	NA	NA	NA	NA	NA	NA	NA	NA	0	0	0	0	1	492	0.0537258	20	62.5	63.1302	5835.18	0	0	0	1
10300013	NA	NA	NA	NA	NA	NA	NA	NA	NA	0	0	0	0	1	262	0.0248117	20	62.5	328.947	4278.54	0	1	0	0
10300014	NA	NA	NA	NA	NA	NA	NA	NA	NA	0	0	0	0	1	745	0.157	8	90	13.575	4960.27	0	0	1	0
10300015	NA	NA	NA	NA	NA	NA	NA	NA	NA	0	0	0	0	1	846	0.212	8	80	9.66194	4960.2	0	0	1	0
10300016	NA	NA	NA	NA	NA	NA	NA	NA	NA	0	0	0	0	1	1009	0.103	8	100	114.602	5883.07	0	0	0	1
10301001	NA	NA	NA	NA	NA	NA	NA	NA	NA	0	0	0	0	1	1172	0.0586662	40	100	14.5938	3939.77	0	0	0	1
10301002	NA	NA	NA	NA	NA	NA	NA	NA	NA	0	0	0	0	1	1200	0.0731096	10	100	7.499	3939.77	0	0	1	0
10301003	NA	NA	NA	NA	NA	NA	NA	NA	NA	0	0	0	0	1	718	0.00428922	5	95	68.7146	3946.58	0	0	0	1
10301004	NA	NA	NA	NA	NA	NA	NA	NA	NA	0	0	0	0	1	687	0.0120082	45	80	130.586	3943.35	0	0	0	1
10301005	NA	NA	NA	NA	NA	NA	NA	NA	NA	0	0	0	0	1	1163	0.0735601	45	97.5	30.3413	3949.55	0	0	0	1
10301006	NA	NA	NA	NA	NA	NA	NA	NA	NA	0	0	0	0	1	564	0.0220072	120	95	203.881	3943.52	0	0	0	1
10301007	NA	NA	NA	NA	NA	NA	NA	NA	NA	0	0	0	0	1	921	0.0512135	25	95	46.4832	3956.68	0	0	0	1
10301008	NA	NA	NA	NA	NA	NA	NA	NA	NA	0	0	0	0	1	423	0.0131177	40	97.5	283.774	3945.24	0	0	0	1
10301009	NA	NA	NA	NA	NA	NA	NA	NA	NA	0	0	0	0	1	1295	0.188933	8	100	8.34597	3939.77	0	0	0	1
10301010	NA	NA	NA	NA	NA	NA	NA	NA	NA	0	0	0	0	1	352	0.0126883	40	97.5	329.235	3944.48	0	0	0	1
10301011	NA	NA	NA	NA	NA	NA	NA	NA	NA	0	0	0	0	1	272	0.0271773	30	97.5	340.51	3944.56	0	0	0	1
10301012	NA	NA	NA	NA	NA	NA	NA	NA	NA	0	0	0	0	1	140	0.00731039	35	100	701.787	3654.08	0	1	0	0
10301013	NA	NA	NA	NA	NA	NA	NA	NA	NA	0	0	0	0	1	821	0.248788	40	55	26.6448	3939.77	0	0	0	1
10301014	NA	NA	NA	NA	NA	NA	NA	NA	NA	0	2	0	0	1	822	0.0360312	5	10	6.68098	3939.77	0	0	0	1
10301015	NA	NA	NA	NA	NA	NA	NA	NA	NA	0	1	0	0	1	709	0.00674252	5	95	23.7877	3943.34	0	0	0	1
10301016	NA	NA	NA	NA	NA	NA	NA	NA	NA	0	0	0	0	1	987	0.208176	5	100	1.78732	3939.77	0	0	0	1
10301017	NA	NA	NA	NA	NA	NA	NA	NA	NA	0	0	0	0	1	712	0.0221066	1.5	95	2.44396	3939.77	0	0	0	1
10301018	NA	NA	NA	NA	NA	NA	NA	NA	NA	0	0	0	0	1	1113	0.305745	16	100	6.021	3939.77	0	0	0	1
10301019	NA	NA	NA	NA	NA	NA	NA	NA	NA	0	0	0	0	1	203	0.0253012	16	87.5	355.664	3948.8	0	1	0	0
10301020	NA	NA	NA	NA	NA	NA	NA	NA	NA	0	0	0	0	1	498	0.099	8	90	354.906	3948.82	0	0	1	0
10302001	NA	NA	NA	NA	NA	NA	NA	NA	NA	0	0	0	0	1	1472	0.0937343	10	100	63.8868	2975.33	0	0	1	0
10302002	NA	NA	NA	NA	NA	NA	NA	NA	NA	0	0	0	0	1	1342	0.103714	16	100	37.9442	4011.35	0	0	1	0
10302003	NA	NA	NA	NA	NA	NA	NA	NA	NA	0	0	0	0	1	1178	0.0996105	16	97.5	12.0561	3857.4	0	0	1	0
10302004	NA	NA	NA	NA	NA	NA	NA	NA	NA	0	0	0	0	1	537	0.0115795	60	100	174.615	5311.71	0	0	1	0
10302005	NA	NA	NA	NA	NA	NA	NA	NA	NA	0	0	0	0	1	843	0.0980815	20	100	15.467	4960.61	0	0	1	0
10302006	NA	NA	NA	NA	NA	NA	NA	NA	NA	0	0	0	0	1	434	0.0447517	30	100	207.8	4901.5	0	0	1	0
10302007	NA	NA	NA	NA	NA	NA	NA	NA	NA	0	0	0	0	1	1186	0.0583046	18	100	63.3111	4925.31	0	0	1	0
10302008	NA	NA	NA	NA	NA	NA	NA	NA	NA	0	0	0	0	1	1207	0.0928571	12	100	25.1024	6878.61	0	0	1	0
10302009	NA	NA	NA	NA	NA	NA	NA	NA	NA	0	0	0	0	1	492	0.045191	20	100	86.7913	3651.22	0	0	1	0
10302010	NA	NA	NA	NA	NA	NA	NA	NA	NA	0	0	0	0	1	188	0.015748	60	50	317.066	4857.43	0	0	1	0
10302011	NA	NA	NA	NA	NA	NA	NA	NA	NA	0	0	0	0	1	828	0.1603	8	100	3.27159	4960.61	0	0	1	0
10302012	NA	NA	NA	NA	NA	NA	NA	NA	NA	0	0	0	0	1	1120	0.0705256	8	100	5.02381	4960.61	0	0	1	0
10302013	NA	NA	NA	NA	NA	NA	NA	NA	NA	0	0	0	0	1	641	0.0528601	50	100	61.8655	5840.94	0	0	1	0
10302014	NA	NA	NA	NA	NA	NA	NA	NA	NA	0	0	0	0	1	352	0.071	8	90	11.5908	4890.2	0	0	1	0
10302015	NA	NA	NA	NA	NA	NA	NA	NA	NA	0	0	0	0	1	842	0.048	40	100	19.5114	4960.61	0	0	1	0
10303001	NA	NA	NA	NA	NA	NA	NA	NA	NA	0	0	0	0	1	855	0.0732799	25	100	28.5195	4338.91	0	0	0	1
10303002	NA	NA	NA	NA	NA	NA	NA	NA	NA	0	0	0	0	1	380	3	40	100	96.9067	4321.87	0	0	1	0
10303003	NA	NA	NA	NA	NA	NA	NA	NA	NA	0	0	0	0	1	1335	0.0647491	10	100	20.3806	4960.15	0	0	0	1
10303004	NA	NA	NA	NA	NA	NA	NA	NA	NA	0	0	0	0	1	1074	0.100149	12	100	7.66963	4887.72	0	0	1	0
10303005	NA	NA	NA	NA	NA	NA	NA	NA	NA	0	0	0	0	1	842	0.103545	15	72.5	213.82	2720.49	0	0	0	1
10303006	NA	NA	NA	NA	NA	NA	NA	NA	NA	0	0	0	0	1	716	0.0547932	12	75	20.4751	3942.24	0	0	0	1
10303007	NA	NA	NA	NA	NA	NA	NA	NA	NA	0	0	0	0	1	775	0.0253851	25	100	61.7916	3385.32	0	0	1	0
10303008	NA	NA	NA	NA	NA	NA	NA	NA	NA	0	0	0	0	1	597	0.0551882	35	100	81.6237	4874.64	0	0	0	1
10303009	NA	NA	NA	NA	NA	NA	NA	NA	NA	0	0	0	0	1	192	0.0348661	60	80	99.7559	4479.8	0	0	1	0
10303010	NA	NA	NA	NA	NA	NA	NA	NA	NA	0	0	0	0	1	471	0.0400974	25	97.5	245.28	3000.02	0	0	0	1
10303011	NA	NA	NA	NA	NA	NA	NA	NA	NA	0	0	0	0	1	158	0.0335	25	100	269.12	3230.5	0	0	1	0
10303012	NA	NA	NA	NA	NA	NA	NA	NA	NA	0	1	0	0	1	515	0.139	8	80	4.81148	3939.77	0	0	1	0
10304001	NA	NA	NA	NA	NA	NA	NA	NA	NA	0	0	0	0	1	121	0.0142087	120	60	421.88	4231.32	0	0	0	1
10304002	NA	NA	NA	NA	NA	NA	NA	NA	NA	0	1	0	0	1	821	0.288446	25	92.5	9.28549	4415.51	0	0	1	0
10304003	NA	NA	NA	NA	NA	NA	NA	NA	NA	0	0	1	0	0	335	0.0218141	3	80	36.2832	3939.77	0	1	0	0
10304004	NA	NA	NA	NA	NA	NA	NA	NA	NA	0	1	0	0	1	308	0.0297483	3	100	31.7087	3939.77	0	1	0	0
10304005	NA	NA	NA	NA	NA	NA	NA	NA	NA	0	0	0	0	1	1040	0.0712685	8	100	18.5576	3939.77	0	0	1	0
10304006	NA	NA	NA	NA	NA	NA	NA	NA	NA	0	0	0	0	1	1113	0.127996	8	100	9.05188	3939.77	0	0	0	1
10304007	NA	NA	NA	NA	NA	NA	NA	NA	NA	0	0	0	0	1	563	0.0474458	8	100	41.1581	3939.77	0	0	0	1
10304008	NA	NA	NA	NA	NA	NA	NA	NA	NA	0	0	1	0	0	139	0.00295534	30	87.5	140.314	3939.4	0	0	1	0
10304009	NA	NA	NA	NA	NA	NA	NA	NA	NA	0	4	0	0	1	1129	0.0972896	8	99	20.6569	3939.77	0	0	0	1
10304010	NA	NA	NA	NA	NA	NA	NA	NA	NA	0	0	0	0	1	447	0.0593859	12	95	33.1546	3939.77	0	0	0	1
10304011	NA	NA	NA	NA	NA	NA	NA	NA	NA	0	0	0	0	1	112	0.00438597	100	95	1684.26	4383.23	0	0	1	0
10304012	NA	1	NA	NA	NA	NA	NA	1	NA	0	0	0	0	1	82	0.0019758	85	90	1731.66	4352.61	0	0	0	1
10304013	NA	NA	NA	NA	NA	NA	NA	NA	NA	0	0	0	1	0	224	0.0330645	10	80	42.4392	3939.77	0	1	0	0
10304014	NA	NA	NA	NA	NA	NA	NA	NA	NA	0	0	0	0	1	273	0.0655303	18	100	4.69983	3939.77	0	1	0	0
10304015	NA	NA	NA	NA	NA	NA	NA	NA	NA	0	0	0	0	1	732	0.133	8	100	19.2541	3876.13	0	0	1	0
10304016	NA	NA	NA	NA	NA	NA	NA	NA	NA	0	0	0	0	1	968	0.291	8	100	5.40798	3777.04	0	0	1	0
10304017	NA	NA	NA	NA	NA	NA	NA	NA	NA	0	0	0	0	1	109	0.009	10	100	0.425757	3128.48	0	0	1	0
10305001	NA	NA	NA	NA	NA	NA	NA	NA	NA	0	0	0	0	1	1148	0.0557819	8	100	53.311	3971.14	0	0	1	0
10305002	NA	NA	NA	NA	NA	NA	NA	NA	NA	0	0	0	0	1	1175	0.251741	8	100	5.49791	3939.77	0	0	1	0
10305003	NA	NA	NA	NA	NA	NA	NA	NA	NA	0	0	0	0	1	1008	0.116084	8	100	44.8865	3977	0	0	1	0
10305004	NA	NA	NA	NA	NA	NA	NA	NA	NA	0	0	0	0	1	885	0.131963	8	100	9.55726	3939.77	0	0	0	1
10305005	NA	NA	NA	NA	NA	NA	NA	NA	NA	0	0	0	0	1	532	0.0421053	20	100	77.2539	3961.42	0	0	0	1
10305006	NA	NA	NA	NA	NA	NA	NA	NA	NA	0	0	0	0	1	352	0.0251605	35	70	115.67	3954.23	0	0	1	0
10305007	NA	NA	NA	NA	NA	NA	NA	NA	NA	0	0	0	0	1	738	0.0562385	10	100	25.7665	4950.38	0	1	0	0
10305008	NA	NA	NA	NA	NA	NA	NA	NA	NA	0	0	0	0	1	480	0.0455433	25	100	90.8309	4913.94	0	1	0	0
10305009	NA	NA	NA	NA	NA	NA	NA	NA	NA	0	0	0	0	1	340	0.0178418	40	100	123.623	4747.4	0	1	0	0
10305010	NA	NA	NA	NA	NA	NA	NA	NA	NA	0	0	0	0	1	438	0.081571	12	100	176.599	4612.61	0	1	0	0
10305011	NA	NA	NA	NA	NA	NA	NA	NA	NA	0	0	0	0	1	195	0.01	50	65	188.325	4570.68	0	0	1	0
10305012	NA	NA	NA	NA	NA	NA	NA	NA	NA	0	0	0	0	1	160	0.00471431	80	95	336.188	4296.99	1	0	0	0
10305013	1	1	NA	NA	NA	NA	NA	1	1	0	0	0	0	1	135	0.011871	60	97.5	355.532	4257.5	0	1	0	0
10305014	NA	NA	NA	NA	NA	NA	NA	NA	NA	0	0	0	0	1	1332	0.136665	8	100	17.5153	3916.45	0	1	0	0
10305015	NA	NA	NA	NA	NA	NA	NA	NA	NA	0	0	0	0	1	1125	0.169911	8	100	13.4236	3909.31	1	0	0	0
10305016	NA	NA	NA	NA	NA	NA	NA	NA	NA	0	0	0	0	1	334	0.174805	12	92.5	1.16032	3036.56	1	0	0	0
10305017	NA	NA	NA	NA	NA	NA	NA	NA	NA	0	0	0	0	1	584	0.0531154	8	100	49.79	4885.5	0	0	1	0
10305018	NA	NA	NA	NA	NA	NA	NA	NA	NA	0	0	0	0	1	1285	0.257779	12	95	4.47439	3939.77	1	0	0	0
10305019	NA	NA	NA	NA	NA	NA	NA	NA	NA	0	0	0	0	1	1230	0.100367	8	100	46.8144	4345.29	1	0	0	0
10305020	NA	NA	NA	NA	NA	NA	NA	NA	NA	0	0	0	0	1	1241	0.154038	8	100	6.99835	4481.52	0	1	0	0
10305021	NA	NA	NA	NA	NA	NA	NA	NA	NA	0	0	0	0	1	636	0.179	8	90	13.2131	3939.77	0	0	1	0
10305022	NA	NA	NA	NA	NA	NA	NA	NA	NA	0	0	0	0	1	1350	0.225	8	100	84.8984	3959.47	0	0	1	0
10305023	NA	NA	NA	NA	NA	NA	NA	NA	NA	0	0	0	0	1	1256	0.21	8	100	3.93673	3939.77	0	0	1	0
10305024	NA	NA	NA	NA	NA	NA	NA	NA	NA	0	0	0	0	1	960	0.06	8	100	8.75065	4079.68	0	0	0	1
10305025	NA	NA	NA	NA	NA	NA	NA	NA	NA	0	0	0	0	1	1198	0.18	8	100	3.1461	3939.77	0	0	0	1
10305026	NA	NA	NA	NA	NA	NA	NA	NA	NA	0	0	0	0	1	830	0.065	10	100	31.2346	4846.87	0	0	0	1
10305027	NA	NA	NA	NA	NA	NA	NA	NA	NA	0	0	0	0	1	608	0.076	8	100	5.45227	4936.26	0	0	1	0
10305028	NA	NA	NA	NA	NA	NA	NA	NA	NA	0	0	0	0	1	813	0.171	8	100	12.1335	4326.64	0	0	1	0
10305029	NA	NA	NA	NA	NA	NA	NA	NA	NA	0	0	0	0	1	690	0.046	8	100	23.3537	4587.73	0	0	1	0
10306001	NA	NA	NA	NA	NA	NA	NA	NA	NA	0	0	0	0	1	1278	0.131236	12	100	19.657	3952.99	0	0	0	1
10306002	NA	NA	NA	NA	NA	NA	NA	NA	NA	0	0	0	0	1	794	0.0465263	22	100	42.8567	3953.13	0	0	0	1
10306003	NA	NA	NA	NA	NA	NA	NA	NA	NA	0	0	0	0	1	828	0.134487	8	100	7.919	3953.25	0	0	0	1
10306004	NA	NA	NA	NA	NA	NA	NA	NA	NA	0	0	0	0	1	747	0.0892857	8	100	15.382	3953.25	0	0	0	1
10306005	NA	NA	NA	NA	NA	NA	NA	NA	NA	0	0	0	0	1	352	0.0309278	20	100	59.7659	3953.11	0	0	0	1
10306006	NA	NA	NA	NA	NA	NA	NA	NA	NA	0	0	0	0	1	1235	0.098465	10	100	62.0468	3942.04	0	0	0	1
10306007	NA	NA	NA	NA	NA	NA	NA	NA	NA	0	0	0	0	1	709	0.0411617	25	100	76.5764	3944	0	0	0	1
10306008	NA	NA	NA	NA	NA	NA	NA	NA	NA	2	0	0	0	1	298	0.00896287	30	82.5	161.282	3946.95	0	0	0	1
10306009	NA	NA	NA	NA	NA	NA	NA	NA	NA	0	0	0	0	1	1421	0.12816	10	100	12.8671	3942.38	0	0	0	1
10306010	NA	NA	NA	NA	NA	NA	NA	NA	NA	0	0	0	0	1	696	0.0438726	12	100	20.6279	3942	0	0	1	1
10306011	NA	NA	NA	NA	NA	NA	NA	NA	NA	0	0	0	0	1	488	0.0137468	16	98	46.6514	3940.77	0	0	0	1
10306012	NA	NA	NA	NA	NA	NA	NA	NA	NA	0	0	0	0	1	493	0.033543	12	100	22.9664	3950.08	0	0	0	1
10306013	NA	NA	NA	NA	NA	NA	NA	NA	NA	0	0	0	0	1	454	0.0317682	15	100	86.7077	3943.44	0	0	0	1
10306014	NA	NA	NA	NA	NA	NA	NA	NA	NA	0	2	0	0	1	486	0.0346608	7	100	4.48005	3947.49	0	0	0	1
10306015	NA	NA	NA	NA	NA	NA	NA	NA	NA	0	0	0	0	1	249	0.00850307	50	97.5	270.395	3945.23	0	0	0	1
10306016	NA	NA	NA	NA	NA	NA	NA	NA	NA	0	0	0	1	0	206	0.00805439	30	94	306.571	3940.5	0	0	0	1
10306017	NA	NA	NA	NA	NA	NA	NA	NA	NA	0	0	1	0	0	129	0.00635465	80	90	307.787	3936.08	0	0	1	0
10306018	NA	NA	NA	NA	NA	NA	NA	NA	NA	0	0	1	0	0	233	0.0140414	6	100	23.5595	3689.63	0	0	0	1
10306019	NA	NA	NA	NA	NA	NA	NA	NA	NA	0	0	0	1	0	132	0.00675429	8	91.5	30.3536	3509.97	0	0	1	0
10306020	NA	NA	NA	NA	NA	NA	NA	NA	NA	0	0	0	0	1	273	0.0502399	8	100	6.57539	2883.38	0	1	0	0
10306021	NA	NA	NA	NA	NA	NA	NA	NA	NA	0	0	0	1	0	95	0.00447883	10	82.5	5.90419	2883.38	0	0	1	0
10306022	NA	NA	NA	NA	NA	NA	NA	NA	NA	0	0	0	1	0	84	0.00295858	20	95	24.0336	2883.38	0	0	1	0
10306023	NA	NA	NA	NA	NA	NA	NA	NA	NA	0	0	0	0	1	405	0.061	8	100	10.3125	3939.77	0	0	1	0
10307001	NA	NA	NA	NA	NA	NA	NA	NA	NA	0	0	0	0	1	1277	0.151943	8	100	8.03753	3012.37	1	0	0	0
10307002	NA	NA	NA	NA	NA	NA	NA	NA	NA	0	0	0	0	1	405	0.0207103	6	100	40.1876	2734.44	1	0	0	0
10307003	NA	NA	NA	NA	NA	NA	NA	NA	NA	0	0	0	0	1	163	0.0043573	6	98	52.7821	2554.16	1	0	0	0
10307004	NA	NA	NA	NA	NA	NA	NA	NA	NA	0	1	0	0	1	121	0.0105342	6	99	65.7288	2442.47	0	1	0	0
10307005	NA	NA	NA	NA	NA	NA	NA	NA	NA	0	0	0	0	1	1203	0.221881	6	100	4.54347	2943.21	1	0	0	0
10307006	NA	NA	NA	NA	NA	NA	NA	NA	NA	0	1	0	0	1	408	0.0388	5	55	30.4879	2875.66	1	0	0	0
10307007	NA	NA	NA	NA	NA	NA	NA	NA	NA	0	0	0	0	1	1363	0.393043	8	100	0.891445	2915.22	1	0	0	0
10307008	NA	NA	NA	NA	NA	NA	NA	NA	NA	0	2	0	0	1	459	0.0477862	8	80	29.936	2886.38	1	0	0	0
10307009	NA	NA	NA	NA	NA	NA	NA	NA	NA	0	0	0	0	1	1290	0.129933	5	100	29.8463	3856.63	1	0	0	0
10307010	NA	NA	NA	NA	NA	NA	NA	NA	NA	0	0	0	0	1	1065	0.0655824	5	100	21.7778	3941.48	0	0	1	0
10307011	NA	NA	NA	NA	NA	NA	NA	NA	NA	0	0	0	0	1	569	0.0939394	10	99	36.8466	3692.39	1	0	0	0
10307012	NA	NA	NA	NA	NA	NA	NA	NA	NA	2	0	0	0	1	259	0.0538889	30	95	41.5704	3600.24	1	0	0	0
10307013	NA	NA	NA	NA	NA	NA	NA	NA	NA	0	0	0	0	1	1230	0.39166	6	100	4.20797	2972.53	1	0	0	0
10307014	NA	NA	NA	NA	NA	NA	NA	NA	NA	0	1	0	0	1	272	0.0828	6	47.5	11.5632	2914.02	1	0	0	0
10307015	NA	NA	NA	NA	NA	NA	NA	NA	NA	0	1	0	0	1	784	0.385823	3	95	1.55761	2883.38	0	0	1	0
10307016	NA	NA	NA	NA	NA	NA	NA	NA	NA	0	0	0	0	1	248	0.0494599	3	100	8.8252	3939.77	0	0	0	1
10307017	NA	NA	NA	NA	NA	NA	NA	NA	NA	0	0	0	0	1	161	0.00692905	3	99.5	152.859	3937.94	0	0	0	1
10307018	NA	NA	NA	NA	NA	NA	NA	NA	NA	0	1	0	0	1	406	0.0723436	3	100	2.39324	3939.77	0	0	0	1
10307019	NA	NA	NA	NA	NA	NA	NA	NA	NA	0	0	0	1	0	214	0.018431	5	95	154.236	3937.96	0	0	0	1
10307020	NA	NA	NA	NA	NA	NA	NA	NA	NA	0	0	1	0	0	136	0.0173319	6	100	166.367	3893.62	0	0	1	0
10307021	NA	NA	NA	NA	NA	NA	NA	NA	NA	0	0	0	0	1	977	0.098	7	100	10.3698	3939.77	0	0	0	1
10307022	NA	NA	NA	NA	NA	NA	NA	NA	NA	0	0	0	0	1	487	0.038289	14	100	37.3815	3939.77	0	0	1	0
10307023	NA	NA	NA	NA	NA	NA	NA	NA	NA	0	0	0	0	1	834	0.0735477	18	100	75.9272	3939.77	0	0	0	1
10307024	NA	NA	NA	NA	NA	NA	NA	NA	NA	0	0	0	0	1	301	0.0176667	14	100	130.054	3937.62	0	0	1	0
10307025	NA	NA	NA	NA	NA	NA	NA	NA	NA	0	0	0	0	1	248	0.0238846	12	97.5	138.745	3937.76	0	0	1	0
10307026	NA	NA	NA	NA	NA	NA	NA	NA	NA	0	0	1	0	0	142	0.019	14	100	10.4348	3784.94	0	0	1	0
10307027	NA	NA	NA	NA	NA	NA	NA	NA	NA	0	0	0	0	1	298	0.110876	7	100	0.78324	3132.84	0	0	1	0
10307028	NA	NA	NA	NA	NA	NA	NA	NA	NA	0	0	0	0	1	622	0.244415	7	100	5.03113	3270.41	0	0	1	0
10307029	NA	NA	NA	NA	NA	NA	NA	NA	NA	0	0	0	0	1	641	0.0591628	12	100	17.2844	3111.57	0	0	1	0
10307030	NA	NA	NA	NA	NA	NA	NA	NA	NA	0	1	0	0	1	1190	0.352389	5	100	2.04914	2883.38	0	0	1	0
10307031	NA	NA	NA	NA	NA	NA	NA	NA	NA	0	0	0	0	1	364	0.138785	12	100	20.6471	3074.58	0	0	1	0
10307032	NA	NA	NA	NA	NA	NA	NA	NA	NA	0	0	0	0	1	650	0.137305	12	100	9.20924	2614.95	0	0	1	0
10307033	NA	NA	NA	NA	NA	NA	NA	NA	NA	0	0	0	0	1	325	0.149097	12	98	10.418	2578.45	0	0	1	0
10307034	NA	NA	NA	NA	NA	NA	NA	NA	NA	0	0	0	0	1	720	0.0457886	5	99	18.6286	3105.31	0	0	0	1
10307035	NA	NA	NA	NA	NA	NA	NA	NA	NA	0	0	0	0	1	482	0.0459733	10	98	47.9609	2636.24	0	0	1	0
10307036	NA	NA	NA	NA	NA	NA	NA	NA	NA	0	0	0	0	1	517	0.0736402	5	98	10.1726	2026.08	0	0	1	0
10307037	NA	NA	NA	NA	NA	NA	NA	NA	NA	1	0	0	0	1	341	0.0771179	30	99	50.4559	2602.35	0	0	1	0
10307038	NA	NA	NA	NA	NA	NA	NA	NA	NA	0	0	0	0	1	398	0.0151805	6	100	21.6534	1987.29	0	1	0	0
10307039	NA	NA	NA	NA	NA	NA	NA	NA	NA	0	0	0	0	1	295	0.0378333	6	100	27.6673	1979.83	0	0	1	0
10307040	NA	NA	NA	NA	NA	NA	NA	NA	NA	0	0	0	0	1	558	0.0253386	13	98	43.9408	2698.31	0	0	1	0
10307041	NA	NA	NA	NA	NA	NA	NA	NA	NA	0	0	1	0	0	213	0.006	6	20	1.69571	2301.53	0	1	0	0
10310001	NA	NA	NA	NA	NA	NA	1	NA	NA	0	1	1	0	0	209	0.00456853	5	62.5	1.67388	1952.97	1	0	0	0
10310002	NA	NA	NA	NA	NA	NA	NA	NA	NA	0	0	0	1	0	191	0.00444192	5	94	59.1409	1952.97	1	0	0	0
10310003	NA	NA	NA	NA	NA	NA	NA	NA	NA	0	0	1	0	0	144	0.00269095	5	100	78.0237	1927.46	1	0	0	0
10310004	NA	NA	NA	NA	NA	NA	NA	NA	NA	1	0	1	0	0	131	0.0111935	10	99	87.9095	1877.61	0	1	0	0
10310005	NA	NA	NA	NA	NA	NA	1	NA	NA	0	3	1	0	0	138	0.00407056	3	40	20.3563	1952.97	1	0	0	0
10310006	NA	NA	NA	NA	NA	NA	1	NA	NA	0	0	1	0	0	105	0.0111111	8	100	38.1	1952.97	1	0	0	0
10310007	NA	NA	NA	NA	NA	NA	NA	NA	NA	0	0	1	0	0	72	0.00236247	62	100	3537.61	3739.98	0	1	0	0
10310008	NA	NA	1	NA	NA	NA	NA	1	NA	0	0	1	0	0	65	0.000737137	90	95	9.92787	1952.97	0	1	0	0
10310009	NA	NA	NA	NA	NA	NA	NA	NA	NA	0	0	1	0	0	60	0.000882526	60	100	3612.59	3628.15	0	1	0	0
10310010	NA	NA	NA	NA	NA	NA	NA	NA	NA	0	2	1	0	0	155	0.021066	5	87.5	40.3644	2883.39	0	1	0	0
10310011	NA	NA	NA	NA	NA	NA	NA	NA	NA	0	1	0	0	1	435	0.00784425	6	100	50.4311	2212.65	0	0	1	0
10310012	NA	NA	NA	NA	NA	NA	NA	NA	NA	0	0	0	0	1	1132	0.0835106	5	100	11.9314	2698.8	0	0	1	0
10310013	NA	NA	NA	NA	NA	NA	NA	NA	NA	0	0	0	0	1	661	0.035214	7	100	24.8822	2422.07	0	0	1	0
10310014	NA	NA	NA	NA	NA	NA	NA	NA	NA	0	0	1	0	0	392	0.0165563	8	95	33.0919	2295.91	0	0	1	0
10310015	NA	NA	NA	NA	NA	NA	NA	NA	NA	0	0	0	0	1	352	0.00983607	12	100	37.2975	2280.63	0	0	1	0
10310016	NA	NA	NA	NA	NA	NA	NA	NA	NA	0	0	0	0	1	542	0.0236885	12	100	42.2515	2496.03	0	0	1	0
10310017	NA	NA	NA	NA	NA	NA	NA	NA	NA	0	0	0	0	1	337	0.0102105	20	99	89.827	2440.6	0	0	1	0
10310018	NA	NA	NA	NA	NA	NA	NA	NA	NA	0	0	1	0	0	240	0.00582605	20	88.5	114.609	2311.62	0	0	1	0
10310019	NA	NA	NA	NA	NA	NA	NA	NA	NA	0	0	1	0	0	184	0.00625738	20	87.5	144.897	2250.2	0	1	0	0
10310020	NA	NA	NA	NA	NA	NA	NA	NA	NA	0	0	1	0	0	131	0.00654756	20	93.5	161.435	2223.71	0	1	0	0
10310021	NA	NA	NA	NA	NA	NA	NA	NA	NA	0	0	0	0	1	800	0.0313335	8	100	27.7151	2930.38	0	0	1	0
10311001	NA	NA	NA	NA	NA	NA	NA	NA	NA	0	0	0	0	1	254	0.00576312	7	90	26.8021	1952.97	0	1	0	0
10311002	NA	NA	NA	NA	NA	NA	NA	NA	NA	0	0	0	1	0	196	0.00487165	12	95	54.511	1880.61	1	0	0	0
10311003	NA	NA	NA	NA	NA	NA	NA	NA	NA	0	0	1	0	0	144	0.00397443	12	98	79.7488	1644.18	0	1	0	0
10311004	NA	NA	NA	NA	NA	NA	NA	NA	NA	0	0	1	0	0	98	0.0025	12	98	91.6756	1548.07	0	1	0	0
10311005	NA	NA	NA	NA	NA	NA	NA	NA	NA	0	0	1	0	0	83	0.00505861	6	100	106.704	1468.74	0	1	0	0
10311006	NA	NA	NA	NA	NA	NA	NA	NA	NA	0	2	1	0	0	162	0.00685533	6	87.5	8.34422	954.167	0	1	0	0
10311007	NA	NA	NA	NA	NA	NA	NA	NA	NA	0	2	1	0	0	169	0.0074882	2	90	29.6512	961.491	0	1	0	0
10311008	NA	NA	NA	NA	NA	NA	NA	NA	NA	0	0	1	0	0	123	0.00434431	2	85	50.5781	958.457	1	0	0	0
10311009	NA	NA	NA	NA	NA	NA	NA	NA	NA	1	1	1	0	0	80	0.004842	3	95	172.533	1267.57	0	1	0	0
10311010	NA	NA	NA	NA	NA	NA	NA	NA	NA	0	0	1	0	0	42	0.00806452	8	96.5	180.905	1255.54	0	1	0	0
10311011	NA	NA	NA	NA	NA	NA	NA	NA	NA	0	0	1	0	0	59	0.00256321	60	98	3907.74	3570.95	0	1	0	0
10311012	NA	NA	NA	NA	NA	NA	NA	NA	NA	0	0	1	0	0	37	0.000597491	80	97.5	3934.38	3552.86	0	1	0	0
10311013	NA	NA	NA	NA	NA	NA	NA	NA	NA	0	0	1	0	0	32	0.000395335	75	99	3962.98	3533.59	0	1	0	0
10311014	NA	NA	NA	NA	NA	NA	NA	NA	NA	0	0	1	0	0	30	0.000777403	60	100	3966.36	3526.29	0	0	0	1
10311015	NA	NA	NA	NA	NA	NA	NA	NA	NA	0	0	1	0	0	27	0.00355135	75	77.5	1.16771	3522.84	0	0	0	1
10311016	NA	NA	NA	NA	NA	NA	NA	NA	NA	0	5	0	0	1	94	0.00551008	3	20	335.699	1652.32	0	0	1	0
10311017	NA	NA	NA	NA	NA	NA	NA	NA	NA	3	4	1	0	0	180	0.0064713	6	75	29.9713	1112.42	0	1	0	0
10311018	NA	NA	NA	NA	NA	NA	NA	NA	NA	0	0	1	0	0	110	0.00564122	14	99	40.0556	1072.6	0	1	0	0
10311019	NA	NA	NA	NA	NA	NA	NA	NA	NA	0	0	1	0	0	95	0.00252133	3	97	57.2848	1036.95	0	1	0	0
10311020	NA	NA	NA	NA	NA	NA	NA	NA	NA	0	0	0	0	1	247	0.006822	5	98	15.2234	1952.97	0	0	1	0
10311021	NA	NA	NA	NA	NA	NA	NA	NA	NA	0	0	0	0	1	182	0.00478289	8	85	49.8894	1924.58	0	0	1	0
10311022	NA	NA	NA	NA	NA	NA	NA	NA	NA	0	0	0	0	1	131	0.00499144	8	100	62.486	1732.45	0	0	1	0
10311023	NA	NA	NA	NA	NA	NA	NA	NA	NA	0	1	0	0	1	154	0.00621547	4	60	11.4432	1919.54	0	0	1	0
10311024	NA	NA	NA	NA	NA	NA	NA	NA	NA	0	2	0	0	1	152	0.00558659	3	85	38.1081	1952.97	0	1	0	0
10311025	NA	NA	NA	NA	NA	NA	NA	NA	NA	0	2	0	0	1	318	0.0107959	3.5	50	18.4777	1952.97	0	0	1	0
10311026	NA	NA	NA	NA	NA	NA	NA	NA	NA	0	0	0	0	1	197	0.00722586	3.5	98	33.5759	1952.97	0	0	1	0
10311027	NA	NA	NA	NA	NA	NA	NA	NA	NA	0	0	0	0	1	123	0.00573614	4	100	57.166	1921.43	0	1	0	0
10311028	NA	NA	NA	NA	NA	NA	NA	NA	NA	0	1	0	0	1	111	0.00271003	4	98	62.0711	1995.14	0	0	1	0
10311029	NA	NA	NA	NA	NA	NA	NA	NA	NA	0	0	0	0	1	184	0.0067868	3	85	9.87921	1952.97	0	0	1	0
10311030	NA	NA	NA	NA	NA	NA	NA	NA	NA	0	1	0	0	1	141	0.00608766	3	60	2.79072	1952.97	0	1	0	0
10311031	NA	NA	NA	NA	NA	NA	NA	NA	NA	0	1	0	0	1	126	0.00291349	5	77.5	110.889	2063.35	0	1	0	0
10311032	NA	NA	NA	NA	NA	NA	NA	NA	NA	0	0	0	0	1	100	0.00172414	8	98	112.37	1956.53	0	0	1	0
10311033	NA	NA	NA	NA	NA	NA	NA	NA	NA	0	0	0	0	1	96	0.00236247	8	99	309.149	1712.3	0	0	1	0
10311034	NA	NA	NA	NA	NA	NA	NA	NA	NA	1	0	0	1	0	82	0.00478071	8	98	335.699	1652.32	0	1	0	0
10311035	NA	NA	NA	NA	NA	NA	NA	NA	NA	0	0	0	0	1	59	0.00394103	10	95	341.905	1629.53	0	1	0	0
10311036	NA	NA	NA	NA	NA	NA	NA	NA	NA	0	0	1	0	0	32	0.00418204	10	98	349.292	1611.25	0	0	0	1
10311037	NA	NA	NA	NA	NA	NA	NA	NA	NA	1	0	1	0	0	15	0.000183857	110	96.5	4531.82	3274.74	0	0	0	1
10311038	NA	NA	NA	NA	NA	NA	NA	NA	NA	0	2	0	1	0	75	0.0100677	4	90	15.842	3266.54	0	1	0	0
10311039	NA	NA	1	NA	NA	NA	NA	1	NA	0	0	1	0	0	14	0.000487995	160	96.5	4532.13	2841.82	0	0	0	1
10311040	NA	NA	NA	NA	NA	NA	NA	NA	NA	0	0	1	0	0	14	0.00059997	25	90	0.0905948	2986.93	0	1	0	0
10311041	NA	NA	NA	NA	NA	NA	NA	NA	NA	1	0	1	0	0	763	0.147	8	80	15.102	1905.5	0	0	1	0
10312001	NA	NA	NA	NA	NA	NA	NA	NA	NA	0	2	0	0	1	384	0.0232911	2	85	10.5978	2394.22	1	0	0	0
10312002	NA	NA	NA	NA	NA	NA	NA	NA	NA	0	1	0	0	1	246	0.00453515	1	25	19.9055	2237.81	1	0	0	0
10312004	NA	NA	NA	NA	NA	NA	NA	NA	NA	0	1	0	0	1	222	0.00224022	3	25	33.7221	2117.86	0	1	0	0
10312005	NA	NA	NA	NA	NA	NA	NA	NA	NA	0	0	0	0	1	361	0.0140403	3	85	29.3722	2271.76	1	0	0	0
10312006	NA	NA	NA	NA	NA	NA	NA	NA	NA	1	1	0	0	1	282	0.0113173	2	85	5.33599	1988.94	0	1	0	0
10312007	NA	NA	NA	NA	NA	NA	NA	NA	NA	0	0	0	0	1	209	0.00172333	12	80	83.0298	2133.81	0	1	0	0
10312008	NA	NA	NA	NA	NA	NA	NA	NA	NA	0	0	0	0	1	198	0.00407125	10	94	115.312	2055.02	0	1	0	0
10312009	NA	NA	NA	NA	NA	NA	NA	NA	NA	0	7	0	0	1	265	0.00126227	6	25	8.92844	1952.97	0	1	0	0
10312010	NA	NA	NA	NA	NA	NA	NA	NA	NA	0	0	0	0	1	256	0.0142483	6	95	144.023	2057.46	0	1	0	0
10312011	NA	NA	NA	NA	NA	NA	NA	NA	NA	0	0	0	1	0	158	0.0021322	22	100	148.113	2054.11	0	1	0	0
10312012	NA	NA	NA	NA	NA	NA	NA	NA	NA	0	0	0	1	0	155	0.00437956	8	100	162.166	2045.78	0	1	0	0
10312013	NA	NA	NA	NA	NA	NA	NA	NA	NA	0	0	0	0	1	149	0.00210859	8	100	177.774	2030.48	0	1	0	0
10312014	NA	NA	NA	NA	NA	NA	NA	NA	NA	0	0	0	0	1	238	0.00926498	6	80	3.69428	1952.97	0	1	0	0
10312015	NA	NA	NA	NA	NA	NA	NA	NA	NA	0	2	0	0	1	193	0.00841288	6	70	196.714	2029.38	0	1	0	0
10312016	NA	NA	NA	NA	NA	NA	NA	NA	NA	0	1	0	0	1	170	0.00488627	3	75	14.8267	1952.97	0	1	0	0
10312017	NA	NA	NA	NA	NA	NA	NA	NA	NA	0	0	0	0	1	184	0.00864454	8	0	5.16599	1952.97	0	1	0	0
10312018	NA	NA	NA	NA	NA	NA	NA	NA	NA	0	0	0	0	1	141	0.00349087	20	92.5	214.409	2023.15	0	1	0	0
10312019	NA	NA	NA	NA	NA	NA	NA	NA	NA	0	0	0	1	0	128	0.00298152	20	92.5	240.033	2015.68	0	1	0	0
10312020	NA	NA	NA	NA	NA	NA	NA	NA	NA	0	0	0	1	0	108	0.00239521	15	100	243.951	2002.86	0	1	0	0
10313001	NA	NA	NA	NA	NA	NA	NA	NA	NA	0	0	0	0	1	168	0.00607121	2	87.5	49.8295	1951.4	0	1	0	0
10313002	NA	NA	NA	NA	NA	NA	NA	NA	NA	0	0	0	0	1	109	0.0037594	12	90	335.537	1930.75	0	1	0	0
10313003	NA	NA	NA	NA	NA	NA	NA	NA	NA	0	2	0	0	1	90	0.00218023	2.5	80	341.037	1928.22	0	1	0	0
10313004	NA	NA	NA	NA	NA	NA	NA	NA	NA	0	0	0	0	1	84	0.000987167	8	80	379.93	1892.66	0	1	0	0
10313005	NA	NA	NA	NA	NA	NA	NA	NA	NA	1	0	0	0	1	139	0.00506586	3	98	15.3053	962.893	1	0	0	0
10313006	NA	NA	NA	NA	NA	NA	NA	NA	NA	0	0	0	0	1	104	0.00258398	3	98	38.3856	957.824	1	0	0	0
10313007	NA	NA	NA	NA	NA	NA	NA	NA	NA	1	0	0	0	1	80	0.00289603	5	98	449.482	1667.47	0	1	0	0
10313008	NA	NA	NA	NA	NA	NA	NA	NA	NA	0	0	0	0	1	101	0.00527295	4	98	54.0946	1007.83	0	1	0	0
10313009	NA	NA	NA	NA	NA	NA	NA	NA	NA	0	0	1	0	0	533	0.0659992	5	92.5	11.1777	1026.91	0	1	0	0
10313010	NA	NA	NA	NA	NA	NA	NA	NA	NA	0	1	1	0	0	318	0.106945	5	92.5	2.00365	990.455	0	1	0	0
10313011	NA	NA	NA	NA	NA	NA	NA	NA	NA	0	0	0	0	1	53	0.00120498	22	90	573.913	1529.14	1	0	0	0
10313012	NA	NA	NA	NA	NA	NA	NA	NA	NA	0	0	1	0	0	219	0.020591	6	98	21.3033	1038.19	0	1	0	0
10313013	NA	NA	NA	NA	NA	NA	NA	NA	NA	0	2	1	0	0	278	0.0239272	4	85	39.5292	1038.19	0	1	0	0
10313014	NA	NA	NA	NA	NA	NA	NA	NA	NA	0	0	0	0	1	65	0.00283836	5	98	60.4497	1592.29	0	1	0	0
10313015	NA	NA	NA	NA	NA	NA	NA	NA	NA	0	0	0	0	1	99	0.003003	4	20	2.03407	954.167	0	1	0	0
10313016	NA	NA	NA	NA	NA	NA	NA	NA	NA	0	1	0	0	1	95	0.00216607	3	30	8.8982	954.167	0	1	0	0
10313017	NA	NA	NA	NA	NA	NA	NA	NA	NA	0	1	0	0	1	89	0.00180108	3	80	31.018	954.167	1	0	0	0
10313018	NA	NA	NA	NA	NA	NA	NA	NA	NA	0	0	0	0	1	71	0.00292746	5	70	50.6888	954.167	0	1	0	0
10313019	NA	NA	NA	NA	NA	NA	NA	NA	NA	1	0	0	0	1	44	0.00234467	20	95	642.524	1519.02	0	0	0	1
10313020	NA	NA	NA	NA	NA	NA	NA	NA	NA	0	0	1	0	0	32	0.00551471	20	27.5	645.139	1443.82	0	0	0	1
10313021	NA	NA	NA	NA	NA	NA	NA	NA	NA	0	0	1	0	0	423	0.123262	2	98	7.92725	956.212	0	1	0	0
10313022	NA	NA	NA	NA	NA	NA	NA	NA	NA	0	0	1	0	0	350	0.0746038	3	0	6.66966	956.225	0	1	0	0
10313023	NA	NA	NA	NA	NA	NA	NA	NA	NA	0	0	0	1	0	157	0.018027	5	85	33.6017	954.651	0	1	0	0
10313024	NA	NA	NA	NA	NA	NA	NA	NA	NA	0	0	0	0	1	49	0.00214235	6	98	64.5762	954.398	1	0	0	0
10313025	NA	NA	NA	NA	NA	NA	NA	NA	NA	0	0	0	0	1	79	0.0217293	5	98	3.90929	954.385	1	0	0	0
10313026	NA	NA	NA	NA	NA	NA	NA	NA	NA	0	0	0	1	0	31	0.0022531	8	98	76.7191	954.353	1	0	0	0
10313027	NA	NA	NA	NA	NA	NA	NA	NA	NA	0	0	1	0	0	25	0.00258702	6	50	91.7774	954.343	1	0	0	0
10320001	NA	NA	NA	NA	NA	NA	NA	NA	NA	0	0	0	0	1	1005	0.0292496	12	100	45.4044	3957.74	0	0	0	1
10320002	NA	NA	NA	NA	NA	NA	NA	NA	NA	0	0	0	0	1	711	0.00885368	14	100	0.0109338	3958.96	0	0	0	1
10320003	NA	NA	NA	NA	NA	NA	NA	NA	NA	0	0	0	0	1	692	0.00608828	20	100	156.204	3958.45	0	0	0	1
10320004	NA	NA	NA	NA	NA	NA	NA	NA	NA	0	0	0	0	1	672	0.0111919	20	100	292.078	3958.32	0	0	0	1
10320005	NA	NA	NA	NA	NA	NA	NA	NA	NA	0	0	0	0	1	1297	0.124756	15	100	49.7062	3967.07	0	0	0	1
10320006	NA	NA	NA	NA	NA	NA	NA	NA	NA	0	0	0	0	1	850	0.0135118	35	100	74.0625	3962.52	0	0	0	1
10320007	NA	NA	NA	NA	NA	NA	NA	NA	NA	0	0	0	0	1	744	0.0469405	35	100	291.823	3958.33	0	0	0	1
10320008	NA	NA	NA	NA	NA	NA	NA	NA	NA	0	0	0	0	1	632	0.0263636	20	100	321.098	3957.88	0	0	0	1
10320009	NA	NA	NA	NA	NA	NA	NA	NA	NA	0	0	0	0	1	516	0.00927357	40	100	365.055	3957.04	0	0	0	1
10320010	NA	NA	NA	NA	NA	NA	NA	NA	NA	0	0	0	0	1	1167	0.07	8	100	21.5344	4151.44	0	0	0	1
10320011	NA	NA	NA	NA	NA	NA	NA	NA	NA	0	0	0	0	1	913	0.043	8	100	99.5391	3089.95	0	0	1	0
10321001	NA	NA	NA	NA	NA	NA	NA	NA	NA	0	0	0	0	1	1312	0.0792923	8	100	96.4395	3959.48	0	0	0	1
10321002	NA	NA	NA	NA	NA	NA	NA	NA	NA	0	0	0	0	1	1011	0.0477312	8	100	46.4046	3955.56	0	0	0	1
10321003	NA	NA	NA	NA	NA	NA	NA	NA	NA	0	0	0	0	1	1207	0.069778	10	100	40.7826	3953.25	0	0	0	1
10321004	NA	NA	NA	NA	NA	NA	NA	NA	NA	0	0	0	0	1	594	0.0153213	10	99	64.3884	3952.91	0	0	0	1
10322001	NA	NA	NA	NA	NA	NA	NA	NA	NA	0	0	0	0	1	445	0.0187765	24	99	519.534	3950.83	0	0	0	1
10322002	NA	NA	NA	NA	NA	NA	NA	NA	NA	0	0	0	0	1	1211	0.0975687	8	100	4.12033	3953.25	0	0	1	0
10322003	NA	NA	NA	NA	NA	NA	NA	NA	NA	0	0	0	0	1	902	0.110967	8	100	21.5268	3938.09	0	0	0	1
10322004	NA	NA	NA	NA	NA	NA	NA	NA	NA	0	0	0	0	1	560	0.0565986	8	100	547.416	3949.99	0	0	0	1
10322005	NA	NA	NA	NA	NA	NA	NA	NA	NA	0	0	0	0	1	352	0.0172872	60	100	576.897	3899.43	0	0	0	1
10322006	NA	NA	NA	NA	NA	NA	NA	NA	NA	0	0	0	0	1	235	0.00738581	120	37.5	582.639	3819.2	0	0	0	1
10322007	NA	NA	NA	NA	NA	NA	NA	NA	NA	0	0	0	0	1	1176	0.101439	3	100	34.2112	3557.94	0	0	0	1
10322008	NA	NA	NA	NA	NA	NA	NA	NA	NA	0	0	0	0	1	1096	0.11775	12	100	27.4097	3740.59	0	0	0	1
10322009	NA	NA	NA	NA	NA	NA	NA	NA	NA	0	0	0	0	1	288	0.0127598	10	100	36.8678	3480.78	0	0	0	1
10322010	NA	NA	NA	NA	NA	NA	NA	NA	NA	0	0	0	0	1	1152	0.0774166	14	85	21.2769	3756.04	0	0	0	1
10322011	NA	NA	NA	NA	NA	NA	NA	NA	NA	0	0	0	0	1	790	0.0911096	14	0	88.7723	3598.3	0	0	0	1
10322012	NA	NA	NA	NA	NA	NA	NA	NA	NA	0	0	0	0	1	253	0.0127013	40	85	109.252	3464.97	0	0	0	1
10322013	NA	NA	NA	NA	NA	NA	NA	NA	NA	0	0	0	0	1	197	0.00230548	60	70	0.544358	3813.11	0	0	1	0
10322014	NA	NA	NA	NA	NA	NA	NA	NA	NA	0	0	0	0	1	1135	0.0801336	8	100	4.28423	2865.91	0	1	0	0
10322015	NA	NA	NA	NA	NA	NA	NA	NA	NA	0	0	0	0	1	974	0.299	8	100	1.97967	2883.38	1	0	0	0
10322016	NA	NA	NA	NA	NA	NA	NA	NA	NA	0	0	0	0	1	1274	0.182	10	100	7.6372	2883.38	0	0	0	1
10322017	NA	NA	NA	NA	NA	NA	NA	NA	NA	0	0	0	0	1	1424	0.081	12	100	17.869	3939.77	0	0	0	1
10322018	NA	NA	NA	NA	NA	NA	NA	NA	NA	0	0	0	0	1	1437	0.108	8	100	7.13384	3939.77	0	0	0	1
10322019	NA	NA	NA	NA	NA	NA	NA	NA	NA	0	0	0	0	1	1429	0.138	8	100	18.2185	3910.55	0	0	0	1
10322020	NA	NA	NA	NA	NA	NA	NA	NA	NA	0	0	0	0	1	1455	0.091	8	50	8.09757	3939.77	0	0	0	1
10323001	NA	NA	NA	NA	NA	NA	NA	NA	NA	0	3	0	0	1	345	0.0195587	3	95	18.4707	2176.74	0	0	0	1
10323002	NA	NA	NA	NA	NA	NA	NA	NA	NA	0	1	1	0	0	267	0.00944228	3	98	30.0571	1983.75	0	1	0	0
10323003	NA	NA	NA	NA	NA	NA	NA	NA	NA	0	0	1	0	0	287	0.0103542	3	98	29.5474	2085.5	0	1	0	0
10323004	NA	1	NA	NA	NA	NA	NA	NA	NA	2	0	0	0	1	701	0.0244681	14	99	81.9875	3421.98	0	0	1	0
10323005	NA	NA	NA	NA	NA	NA	NA	NA	NA	0	0	0	0	1	448	0.0355357	14	99	97.774	3266.01	0	1	0	0
10323006	NA	NA	NA	NA	NA	NA	NA	1	1	1	0	1	0	0	249	0.00966651	20	70	100.753	3166.37	0	1	0	0
10323007	NA	NA	NA	NA	NA	NA	NA	NA	NA	0	0	0	0	1	796	0.162828	10	100	11.2377	2610.85	0	0	1	0
10323008	NA	NA	NA	NA	NA	NA	NA	NA	NA	0	0	0	0	1	194	0.000863558	80	25	721.962	3776.16	0	0	1	0
10323009	NA	NA	NA	NA	NA	NA	NA	NA	NA	0	0	0	0	1	1142	0.210553	5	100	5.45906	2883.38	0	0	1	0
10323010	NA	NA	NA	NA	NA	NA	NA	NA	NA	0	0	0	0	1	312	0.0576999	6	80	15.9336	2785.91	0	0	1	0
10323011	NA	NA	NA	NA	NA	NA	NA	NA	NA	0	0	0	0	1	1129	0.244593	6	100	10.5432	2874.47	0	0	1	0
10323012	NA	NA	NA	NA	NA	NA	NA	NA	NA	0	0	0	0	1	326	0.0398134	10	98	16.7942	2733.3	0	0	1	0
10323013	NA	NA	NA	NA	NA	NA	NA	NA	NA	0	0	0	0	1	925	0.0941613	10	100	8.0542	2871.04	0	0	0	1
10323014	NA	NA	NA	NA	NA	NA	NA	NA	NA	0	0	0	0	1	417	0.0524708	8	98	97.4279	2873.75	0	0	1	0
10323015	NA	NA	NA	NA	NA	NA	NA	NA	NA	0	0	0	0	1	1133	0.0976909	5	100	9.06446	3708.46	0	0	0	1
10323016	NA	NA	NA	NA	NA	NA	NA	NA	NA	0	0	0	0	1	1269	0.10847	5	100	6.79473	3787.98	0	0	0	1
10323017	NA	NA	NA	NA	NA	NA	NA	NA	NA	0	0	0	0	1	913	0.149118	8	100	17.5031	3662.87	0	0	0	1
10323018	NA	NA	NA	NA	NA	NA	NA	NA	NA	0	0	0	0	1	617	0.0186716	18	100	47.8992	3189.43	0	0	0	1
10323019	NA	NA	NA	NA	NA	NA	NA	NA	NA	0	0	0	0	1	486	0.035906	10	98	81.3679	2918.14	0	0	0	1
10323020	NA	NA	NA	NA	NA	NA	NA	NA	NA	0	0	0	0	1	581	0.04025	10	98	23.3705	2607.98	0	1	0	0
10323021	NA	NA	NA	NA	NA	NA	NA	NA	NA	2	0	0	0	1	420	0.0356042	12	98	33.4376	2466.2	0	0	1	0
10323022	NA	NA	NA	NA	NA	NA	NA	NA	NA	1	1	0	0	1	240	0.0089172	6	95	26.6082	2052.47	0	1	0	0
10323023	NA	NA	NA	NA	NA	NA	NA	NA	NA	0	0	0	0	1	193	0.000411692	40	100	1278.21	3185.18	1	0	0	0
10323024	NA	NA	NA	NA	NA	NA	NA	NA	NA	0	0	0	0	1	292	0.0123071	10	95	116.576	2841.96	0	0	1	0
10323025	NA	NA	NA	NA	NA	NA	NA	NA	NA	1	0	0	0	1	879	0.159	8	100	5.29955	2883.38	0	0	1	0
10323026	NA	NA	NA	NA	NA	NA	NA	NA	NA	1	0	0	0	1	873	0.135	8	100	6.27115	2883.38	0	0	1	0
10323027	NA	NA	NA	NA	NA	NA	NA	NA	NA	0	0	0	0	1	940	0.052	10	100	34.7996	3649.24	0	0	0	1
10323028	NA	NA	NA	NA	NA	NA	NA	NA	NA	0	0	0	0	1	1314	0.087	8	90	14.0083	3888.48	0	0	0	1
10323029	NA	NA	NA	NA	NA	NA	NA	NA	NA	0	0	0	0	1	892	0.065	8	90	2.29002	2641.63	0	0	1	0
10324001	NA	NA	NA	NA	NA	NA	NA	NA	NA	0	1	0	0	1	292	0.00925674	3	98	23.1437	1952.97	0	1	0	0
10324002	NA	NA	NA	NA	NA	NA	NA	NA	NA	0	0	0	0	1	224	0.00314402	3	98	57.8335	1952.97	0	1	0	0
10324003	NA	NA	NA	NA	NA	NA	NA	NA	NA	0	0	0	0	1	193	0.000482044	30	99	1378.37	3095.44	0	1	0	0
10324004	NA	NA	NA	NA	NA	NA	NA	NA	NA	0	0	0	0	1	224	0.00608856	4	98	1378.37	3095.44	0	1	0	0
10324005	1	NA	NA	NA	NA	NA	1	1	NA	8	0	0	0	1	191	0.00670455	45	0	1423.7	3059.04	0	1	0	0
10324006	NA	NA	NA	1	NA	NA	1	NA	NA	0	0	0	0	1	216	0.0101683	4	0	1423.73	3059.02	0	1	0	0
10324007	1	NA	NA	NA	NA	NA	1	NA	NA	0	0	0	0	1	132	0.00224604	25	100	1458.99	3032.22	0	1	0	0
10324008	NA	NA	NA	NA	NA	NA	NA	NA	NA	0	0	0	0	1	141	0.00567454	8	85	1458.99	3032.22	0	1	0	0
10324009	NA	NA	NA	NA	NA	NA	NA	NA	NA	0	0	0	0	1	110	0.00186849	25	95	1548.08	2969.97	0	1	0	0
10324010	NA	NA	NA	NA	NA	NA	NA	NA	NA	0	0	0	0	1	150	0.00693215	6	98	36.651	1952.97	0	1	0	0
10324011	NA	NA	NA	1	NA	NA	NA	NA	NA	0	3	0	0	1	126	0.00324535	5	25	25.7254	1952.97	1	0	0	0
10324012	NA	NA	NA	NA	NA	NA	NA	NA	NA	0	0	0	0	1	96	0.00246103	20	98	1584.61	2939.37	0	1	0	0
10324013	NA	NA	NA	NA	NA	NA	NA	NA	NA	0	0	0	0	1	121	0.00602492	4	70	10.6602	1952.97	0	1	0	0
10324014	NA	NA	NA	1	NA	NA	NA	NA	NA	2	1	0	0	1	115	0.00454266	4	95	27.6158	1567	0	1	0	0
10324015	NA	NA	NA	NA	NA	NA	NA	NA	NA	0	0	0	0	1	78	0.00348101	40	98	1599.42	2925.35	0	1	0	0
10324016	NA	NA	NA	NA	NA	NA	NA	NA	NA	0	0	0	0	1	106	0.00497725	2	35	1584.89	2939.01	0	1	0	0
10324017	NA	NA	NA	NA	NA	NA	NA	NA	NA	0	0	0	0	1	101	0.00682046	3	98	1599.48	2925.29	0	1	0	0
10324018	NA	NA	NA	NA	NA	NA	NA	NA	1	0	0	0	0	1	67	0.00394506	50	98	1615.73	2905.44	0	1	0	0
10325001	NA	NA	NA	NA	NA	NA	NA	NA	NA	0	0	0	0	1	767	0.0775322	3	100	31.6876	3185.52	0	0	1	0
10325002	NA	NA	NA	NA	NA	NA	NA	NA	NA	0	0	0	0	1	871	0.0298153	8	100	31.6876	3185.52	0	0	1	0
10325003	NA	NA	NA	NA	NA	NA	NA	NA	NA	0	0	0	0	1	532	0.0237107	8	100	38.7205	3121.79	0	0	1	0
10325004	NA	NA	NA	NA	NA	NA	NA	NA	NA	2	0	0	1	0	412	0.0203414	8	98	44.663	3019.95	0	0	1	0
10325005	NA	NA	NA	NA	NA	NA	NA	NA	NA	0	0	0	0	1	783	0.0305556	14	100	42.7562	3491.92	0	0	1	0
10325006	NA	NA	NA	NA	NA	NA	NA	NA	NA	0	0	0	0	1	508	0.0153264	20	0	75.1904	3241.55	0	0	1	0
10325007	NA	NA	NA	NA	NA	NA	NA	NA	NA	0	0	0	0	1	826	0.060959	6	0	75.2112	3241.47	0	0	0	1
10325008	NA	NA	NA	NA	NA	NA	NA	NA	NA	0	0	0	1	0	423	0.0171915	14	98	90.0754	3136.11	0	0	0	1
10325009	NA	NA	NA	NA	NA	NA	NA	NA	NA	0	0	1	0	0	474	0.0378827	6	99	90.0788	3136.04	0	0	0	1
10325010	NA	NA	NA	NA	NA	NA	NA	NA	NA	0	0	0	1	0	328	0.0115559	10	100	136.249	3088.66	0	0	0	1
10325011	NA	NA	NA	NA	NA	NA	NA	NA	NA	0	0	0	0	1	300	0.00810682	14	95	186.47	2948.84	0	0	0	1
10325012	NA	NA	NA	NA	NA	NA	NA	NA	NA	0	0	0	0	1	1037	0.0607987	3	100	10.2927	2883.38	0	0	0	1
10325013	NA	NA	NA	NA	NA	NA	NA	NA	NA	0	0	0	0	1	597	0.0459259	5	99.5	27.7156	2783.83	0	1	0	0
10325014	NA	NA	NA	NA	NA	NA	NA	NA	NA	0	0	0	0	1	411	0.0144174	7	99	34.8253	2686.86	0	0	0	1
10325015	NA	NA	NA	NA	NA	NA	NA	NA	NA	0	0	0	0	1	350	0.00883206	6	98	186.47	2948.84	0	0	0	1
10325016	NA	NA	NA	NA	NA	NA	NA	NA	NA	0	0	0	0	1	283	0.0085157	25	100	229.179	2812.45	0	0	0	1
10325017	NA	NA	NA	NA	NA	NA	NA	NA	NA	0	0	0	0	1	444	0.0251445	5	98	10.9752	2301.53	0	0	1	0
10325018	NA	NA	NA	NA	NA	NA	NA	NA	NA	0	0	0	0	1	444	0.0330037	5	85	33.2913	2247.51	0	0	1	0
10325019	NA	NA	NA	NA	NA	NA	NA	NA	NA	0	0	0	0	1	197	0.00643717	30	99.5	240.394	2774.47	1	0	0	0
10325020	NA	NA	NA	NA	NA	NA	NA	NA	NA	0	0	0	0	1	374	0.0123918	1	50	45.226	2557.02	0	1	0	0
10325021	NA	NA	NA	NA	NA	NA	NA	NA	NA	0	0	0	0	1	301	0.00709393	8	99	17.8176	2028.53	0	0	0	1
10325022	1	NA	NA	NA	NA	NA	NA	NA	NA	0	0	0	0	1	243	0.0126466	5	98	31.0262	1996.42	0	0	0	1
10325023	NA	NA	NA	NA	NA	NA	NA	NA	NA	0	0	0	0	1	174	0.00377131	30	100	287.747	2644.08	1	0	0	0
10325024	NA	NA	NA	NA	NA	NA	NA	NA	NA	0	0	0	0	1	149	0.00660631	12	100	294.683	2627.94	1	0	0	0
10325025	NA	NA	NA	NA	NA	NA	NA	NA	NA	0	0	0	0	1	122	0.00346944	20	100	302.165	2611.2	1	0	0	0
10325026	NA	NA	NA	NA	NA	NA	NA	NA	NA	0	0	0	0	1	109	0.00306364	25	100	327.491	2560.28	1	0	0	0
10326001	NA	NA	NA	NA	NA	NA	NA	NA	NA	0	0	0	0	1	850	0.0340645	10	100	31.977	2859.1	0	0	1	0
10326002	NA	NA	NA	NA	NA	NA	NA	NA	NA	0	0	0	0	1	440	0.0284741	12	99.5	64.1402	2510.69	0	1	0	0
10326003	NA	NA	NA	NA	NA	NA	NA	NA	NA	0	0	0	0	1	322	0.0182584	6	80	25.015	2163.17	0	1	0	0
10326004	NA	NA	NA	NA	NA	NA	NA	NA	NA	0	0	0	0	1	231	0.00598915	10	95	94.1326	2332.84	0	1	0	0
10326005	NA	NA	NA	NA	NA	NA	NA	NA	NA	0	0	1	0	0	167	0.00537792	12	0	258.259	2259.73	0	1	0	0
10326006	NA	NA	NA	NA	NA	NA	NA	NA	NA	0	0	0	0	1	726	0.0388526	6	100	12.7891	2691.15	0	0	1	0
10326007	NA	NA	NA	NA	NA	NA	NA	NA	NA	0	0	0	0	1	470	0.0286738	6	100	27.6046	2466.38	0	0	1	0
10326008	NA	NA	NA	NA	NA	NA	NA	NA	NA	0	0	0	0	1	633	0.0477956	6	100	12.7216	2767.53	0	0	1	0
10326009	NA	NA	NA	NA	NA	NA	NA	NA	NA	0	0	0	0	1	473	0.0447604	4	100	12.7216	2767.53	0	0	1	0
10326010	NA	NA	NA	NA	NA	NA	NA	NA	NA	0	0	0	0	1	388	0.0155466	8	99	74.9063	2510.46	0	0	1	0
10326011	NA	NA	NA	NA	NA	NA	NA	NA	NA	0	0	0	0	1	230	0.00791992	10	87.5	110.395	2346.95	0	0	1	0
10326012	NA	NA	NA	NA	NA	NA	NA	NA	NA	0	0	0	0	1	158	0.00509404	10	96.5	143.907	2255.1	0	1	0	0
10326013	NA	NA	NA	NA	NA	NA	NA	NA	NA	0	3	0	0	1	223	0.0128459	5	90	11.8321	1952.97	0	0	1	0
10326014	NA	NA	NA	NA	NA	NA	NA	NA	NA	0	0	0	0	1	158	0.0061052	6	90	143.945	2255.01	0	0	1	0
10326015	NA	NA	NA	NA	NA	NA	NA	NA	NA	0	0	0	0	1	119	0.00436954	12	100	149.329	2244.16	0	1	0	0
10326016	NA	NA	NA	NA	NA	NA	NA	NA	NA	0	0	0	0	1	112	0.00216809	14	99	380.928	2175.1	0	1	0	0
10326017	NA	NA	NA	NA	NA	NA	NA	NA	NA	0	0	0	0	1	264	0.00963922	12	95	26.3498	2120.41	0	0	1	0
10326018	NA	NA	NA	NA	NA	NA	NA	NA	NA	0	0	0	0	1	194	0.00654601	10	100	38.2392	2068.5	0	0	1	0
10326020	NA	NA	NA	NA	NA	NA	NA	NA	NA	0	0	0	0	1	292	0.0138735	5	100	11.6255	2038.48	0	1	0	0
10326021	NA	NA	NA	NA	NA	NA	NA	NA	NA	0	0	0	0	1	192	0.00523392	5	100	72.4198	2027.72	0	1	0	0
10326022	NA	NA	NA	NA	NA	NA	NA	NA	NA	0	0	0	0	1	143	0.00285578	10	100	92.581	2011.44	1	0	0	0
10326023	NA	NA	NA	NA	NA	NA	NA	NA	NA	0	0	0	0	1	119	0.00364188	14	99	112.361	2001.13	1	0	0	0
10326024	NA	NA	NA	NA	NA	NA	NA	NA	NA	0	0	0	0	1	95	0.00770975	20	100	716.671	2348.51	0	1	0	0
10326025	NA	NA	NA	NA	NA	NA	NA	NA	NA	0	0	1	0	0	84	0.00129324	20	0	754.415	2320.56	1	0	0	0
10326026	NA	NA	NA	NA	NA	NA	NA	NA	NA	0	0	1	0	0	313	0.012	8	80	21.7398	2032.98	0	0	1	0
10327001	NA	NA	NA	NA	NA	NA	NA	NA	NA	0	0	0	0	1	885	0.0319989	5	100	12.8401	3073.18	0	0	1	0
10327002	NA	NA	NA	NA	NA	NA	NA	NA	NA	0	0	0	0	1	658	0.0341671	6	100	24.8329	2694.37	0	0	1	0
10327003	NA	NA	NA	NA	NA	NA	NA	NA	NA	0	0	0	0	1	393	0.0181818	8	97.5	38.4143	2432.66	0	0	1	0
10327004	NA	NA	NA	NA	NA	NA	NA	NA	NA	0	0	0	0	1	281	0.0126188	10	90	56.9203	2276.86	0	1	0	0
10327005	NA	NA	NA	NA	NA	NA	NA	NA	NA	0	2	0	0	1	277	0.0192447	3	75	4.61939	1952.97	0	0	1	0
10327006	NA	NA	NA	NA	NA	NA	NA	NA	NA	1	0	0	0	1	320	0.0149493	3	95	56.9203	2276.86	0	0	1	0
10327007	NA	NA	NA	NA	NA	NA	NA	NA	NA	0	0	0	0	1	208	0.00641667	14	37.5	89.0915	2159.95	0	1	0	0
10327008	NA	NA	NA	NA	NA	NA	NA	NA	NA	0	1	0	0	1	253	0.0105164	3	85	9.27235	1952.97	0	0	1	0
10327009	NA	NA	NA	NA	NA	NA	NA	NA	NA	0	0	0	0	1	186	0.00894164	5	100	86.8065	2165.37	0	1	0	0
10327010	NA	NA	NA	NA	NA	NA	NA	NA	NA	0	0	0	0	1	131	0.00243902	15	15	95.2676	2146.53	0	1	0	0
10327011	NA	NA	NA	NA	NA	NA	NA	NA	NA	1	1	0	0	1	174	0.00653777	5	0	7.08761	1952.97	0	1	0	0
10327012	NA	NA	NA	NA	NA	NA	NA	NA	NA	0	0	0	0	1	127	0.00229124	5	30	117.723	2095.96	0	0	1	0
10327014	NA	NA	NA	NA	NA	NA	NA	NA	NA	0	0	0	0	1	100	0.00259887	8	100	754.415	2320.56	0	0	1	0
10327015	NA	NA	NA	NA	NA	NA	NA	NA	NA	0	0	0	0	1	77	0.00217391	20	97	2398.84	2701.2	0	1	0	0
10327016	NA	NA	NA	NA	NA	NA	NA	NA	NA	0	0	0	0	1	538	0.0543986	3	95	4.10751	2301.53	0	0	1	0
10327017	NA	NA	NA	NA	NA	NA	NA	NA	NA	0	0	0	0	1	410	0.0239977	2	70	15.9416	2223.39	0	0	1	0
10327018	NA	NA	NA	NA	NA	NA	NA	NA	NA	0	0	1	0	0	331	0.019	8	80	2.36222	1952.97	0	0	1	0
10328001	NA	NA	NA	NA	NA	NA	NA	NA	NA	0	0	0	0	1	49	0.00286566	80	92.5	2442.49	2669.89	0	1	0	0
10328002	NA	NA	NA	NA	NA	NA	NA	NA	NA	0	0	0	0	1	24	0.00133511	80	87.5	2499.66	2630.62	0	1	0	0
10328003	NA	NA	NA	1	1	NA	NA	NA	1	0	0	0	0	1	20	0.00118751	80	77.5	2604.34	2563.15	0	1	0	0
10328004	NA	NA	NA	NA	NA	NA	NA	NA	NA	0	0	0	0	1	10	0.000425351	80	92.5	2618.3	2554.55	0	1	0	0
10328005	NA	NA	NA	NA	NA	NA	NA	NA	NA	0	1	0	0	1	93	0.00271417	5	30	12.0874	954.167	0	1	0	0
10328006	NA	NA	NA	NA	NA	NA	NA	NA	NA	0	0	0	0	1	77	0.0137189	8	100	2419.87	2685.96	0	1	0	0
10328007	NA	NA	NA	NA	NA	NA	NA	NA	NA	0	0	0	0	1	90	0.00179113	5	98	30.2901	954.167	0	0	1	0
10328009	NA	NA	NA	NA	NA	NA	NA	NA	NA	0	3	0	0	1	76	0.00902062	5	30	2515.04	2620.38	0	1	0	0
10328010	NA	NA	NA	NA	NA	NA	NA	NA	NA	0	0	0	0	1	73	0.0166375	4	95	4.10348	954.167	0	0	0	1
10328012	NA	NA	NA	NA	NA	NA	NA	NA	NA	0	0	0	0	1	81	0.00881236	4	35	2590.43	2571.82	0	1	0	0
10328013	NA	NA	NA	NA	NA	NA	NA	NA	NA	0	0	0	0	1	54	0.0186047	3	75	2.60641	954.167	0	1	0	0
10328014	NA	NA	NA	NA	NA	NA	NA	NA	NA	1	0	0	0	1	59	0.0012012	3	30.015	24.8217	954.167	0	1	0	0
10328015	NA	NA	NA	NA	NA	NA	NA	NA	NA	0	0	0	0	1	82	0.00327216	2	75	9.39927	954.167	0	1	0	0
10328016	NA	NA	NA	NA	NA	NA	NA	NA	NA	0	0	0	1	0	59	0.00564175	2	65	2565.47	2587.58	0	1	0	0
10328017	NA	NA	NA	NA	NA	NA	NA	NA	NA	0	0	0	1	0	51	0.032	3	0	36.5122	954.167	0	1	0	0
10330001	NA	NA	1	1	1	NA	NA	NA	NA	0	0	0	0	1	10	0.000269034	150	92.5	8004.1	2837.17	0	1	0	0
10330002	NA	NA	NA	1	NA	NA	NA	NA	NA	0	0	0	0	1	8	0.000202655	75	98	8207.74	2790.41	0	1	0	0
10330003	NA	NA	NA	NA	NA	NA	NA	NA	NA	0	0	0	0	1	8	0.000225632	100	99	8217.56	2788.24	0	1	0	0
10330004	NA	NA	NA	NA	NA	NA	NA	NA	NA	0	0	0	0	1	6	0	210	50	14531.6	2468.97	0	0	1	0
10330005	NA	NA	NA	NA	NA	NA	NA	NA	NA	0	1	0	0	1	80	0.0049102	3	90	25.5002	954.167	0	1	0	0
10330006	NA	NA	NA	NA	NA	NA	NA	NA	NA	0	0	0	0	1	42	0.00174419	5	60	117.413	954.167	0	1	0	0
10330007	NA	NA	NA	NA	NA	NA	NA	NA	NA	0	0	0	0	1	80	0.00756107	4	85	34.7659	954.167	0	1	0	0
10330008	NA	NA	NA	NA	NA	NA	NA	NA	NA	0	0	0	0	1	41	0.00144794	4	98	117.83	954.167	0	1	0	0
10330009	NA	NA	NA	NA	NA	NA	NA	NA	NA	0	2	0	0	1	185	0.0135059	4	98	34.7659	954.167	0	0	1	0
10330010	NA	NA	NA	NA	NA	NA	NA	NA	NA	0	0	0	0	1	30	0.00293165	15	95	8163.56	2800.36	0	1	0	0
10330011	NA	NA	NA	NA	NA	NA	NA	NA	NA	0	0	0	0	1	108	0.0161616	3	50	8.33756	954.167	0	1	0	0
10330012	NA	NA	NA	NA	NA	NA	NA	NA	NA	0	0	0	0	1	44	0.0124679	3	80	129.719	954.167	0	1	0	0
10330013	NA	NA	NA	NA	NA	NA	NA	NA	NA	0	0	1	0	0	209	0.0489381	5	100	14.9006	1250.77	0	0	1	0
10330014	NA	NA	NA	NA	NA	NA	NA	NA	NA	0	0	1	0	0	134	0.0707071	5	85	4.61205	954.167	1	0	0	0
10330015	NA	NA	NA	NA	NA	NA	NA	NA	NA	0	0	0	0	1	50	0.00570459	8	98	30.1498	1101.13	1	0	0	0
10330016	NA	NA	NA	NA	NA	NA	NA	NA	NA	0	0	0	0	1	13	0.000806777	12	98	70.7085	1016.87	0	1	0	0
10330017	NA	NA	NA	NA	NA	NA	NA	NA	NA	0	0	1	0	0	622	0.0801994	4	100	33.3604	1948.37	1	0	0	0
10330018	NA	NA	NA	1	NA	NA	NA	NA	1	0	0	1	0	0	59	0.00439078	14	95	70.8154	1808.06	0	0	1	0
10330019	NA	NA	NA	NA	NA	NA	NA	NA	NA	0	0	1	0	0	50	0.0127258	4	85	8.52395	1452.05	0	1	0	0
10330020	NA	NA	NA	NA	NA	NA	NA	NA	NA	0	0	1	0	0	19	0.00242351	12	99	75.913	1751.28	0	1	0	0
10330021	NA	NA	NA	NA	NA	NA	NA	NA	NA	0	0	1	0	0	11	0.000563804	12	100	164.045	1349.69	0	1	0	0
10330022	NA	NA	NA	NA	NA	NA	NA	NA	NA	0	0	1	0	0	42	0.00877674	6	100	30.0242	954.167	1	0	0	0
10330023	NA	NA	NA	NA	NA	NA	NA	NA	NA	0	0	0	0	1	26	0.00433333	6	98	34.6936	954.167	0	1	0	0
10340001	NA	NA	NA	NA	NA	NA	NA	NA	NA	0	0	0	0	1	742	0.0588473	23	100	97.8854	3955.33	0	0	0	1
10340002	NA	NA	NA	NA	NA	NA	NA	NA	NA	0	0	0	0	1	655	0.077355	32	100	21.8304	3953.25	0	0	1	0
10340003	NA	NA	NA	NA	NA	NA	NA	NA	NA	0	0	0	0	1	355	0.0682986	11	95	67.94	3874.7	0	0	1	0
10340004	NA	NA	NA	NA	NA	NA	NA	NA	NA	0	0	0	0	1	159	0.0177954	30	90	99.3867	3953.48	0	0	1	0
10340005	NA	NA	NA	NA	NA	NA	NA	NA	NA	0	0	0	0	1	603	0.186699	25	100	11.875	3778.23	0	0	0	1
10340006	NA	NA	NA	NA	NA	NA	NA	NA	NA	0	0	0	0	1	960	0.121137	15	95	38.636	3611.16	0	0	1	0
10340007	NA	NA	NA	NA	NA	NA	NA	NA	NA	0	0	0	0	1	850	0.0782515	26	100	48.2817	3374.31	0	0	1	0
10340008	NA	NA	NA	NA	NA	NA	NA	NA	NA	0	0	0	0	1	812	0.0836275	32	100	15.171	3953.25	0	0	0	1
10340009	NA	NA	NA	NA	NA	NA	NA	NA	NA	0	0	0	0	1	772	0.133666	15	100	18.9888	3953.25	0	0	0	1
10340010	NA	NA	NA	NA	NA	NA	NA	NA	NA	0	0	0	0	1	504	0.0514066	17	100	27.8166	3919.25	0	0	0	1
10340011	NA	NA	NA	NA	NA	NA	NA	NA	NA	0	0	0	0	1	303	0.0174789	20	100	41.0601	3795.86	0	0	0	1
10340012	NA	NA	NA	NA	NA	NA	NA	NA	NA	0	0	0	0	1	476	0.0585299	24	100	48.6458	3656.27	0	0	0	1
10340013	NA	NA	NA	NA	NA	NA	NA	NA	NA	0	0	0	0	1	218	0.0103444	22	75	69.6338	3436.02	0	0	1	0
10340014	NA	NA	NA	NA	NA	NA	NA	NA	NA	0	0	0	0	1	894	0.114899	19	100	13.3877	3204.5	0	0	1	0
10340015	NA	NA	NA	NA	NA	NA	NA	NA	NA	0	0	0	0	1	448	0.131362	18	100	0.518406	2883.38	0	0	0	1
10340016	NA	NA	NA	NA	NA	NA	NA	NA	NA	0	0	0	0	1	257	0.0380007	15	60	9.3009	2923.88	0	0	0	1
10340017	NA	NA	NA	NA	NA	NA	NA	NA	NA	0	0	0	0	1	285	0.0535651	27	50	6.04544	2853	0	0	1	0
10340018	NA	NA	NA	NA	NA	NA	NA	NA	NA	0	0	1	0	0	270	0.00635397	30	85	21.4057	2406.67	0	0	1	0
10340019	NA	NA	NA	NA	NA	NA	NA	NA	NA	0	0	0	0	1	215	0.00758396	23	100	50.1498	2156.24	0	1	0	0
10340020	NA	NA	NA	NA	NA	NA	NA	NA	NA	0	0	0	0	1	1295	0.139624	31	100	8.74647	2883.38	0	1	0	0
10340021	NA	NA	NA	NA	NA	NA	NA	NA	NA	0	0	0	0	1	1143	0.201964	23	100	8.76476	2883.38	0	1	0	0
10340022	NA	NA	NA	NA	NA	NA	NA	NA	NA	0	0	0	0	1	567	0.176113	9	100	12.3908	2872.38	0	0	1	0
10340023	NA	NA	NA	NA	NA	NA	NA	NA	NA	0	0	0	0	1	1218	0.0677313	22	100	31.0681	3288.19	0	0	1	0
10340024	NA	NA	NA	NA	NA	NA	NA	NA	NA	2	0	0	0	1	603	0.0394223	23	100	74.7698	2797.45	0	0	1	0
10340025	NA	NA	NA	NA	NA	NA	NA	NA	NA	0	0	0	0	1	296	0.025569	26	90	20.4776	2004.89	0	1	0	0
10340026	NA	NA	NA	NA	NA	NA	NA	NA	NA	0	0	0	0	1	290	0.0382044	37	95	6.41102	1952.97	0	1	0	0
10340027	NA	NA	NA	NA	NA	NA	NA	NA	NA	0	0	0	0	1	130	0.000294204	46	80	994.707	2793.52	0	0	1	0
10340028	NA	NA	NA	NA	NA	NA	NA	NA	NA	0	0	0	0	1	634	0.184	8	100	4.73502	3372.11	0	0	1	0
10340029	NA	NA	NA	NA	NA	NA	NA	NA	NA	0	0	0	0	1	437	0.085	8	100	33.7228	3953.25	0	0	1	0
10340030	NA	NA	NA	NA	NA	NA	NA	NA	NA	0	0	0	0	1	2629	0.791	8	100	9.03962	2331.33	1	0	0	0
10340031	NA	NA	NA	NA	NA	NA	NA	NA	NA	0	1	0	0	1	342	0.122	8	100	1.71904	2299.93	0	0	1	0
10340032	NA	NA	NA	NA	NA	NA	NA	NA	NA	0	0	0	0	1	368	0.158	8	100	4.502	2001.96	0	0	1	0
10340033	NA	NA	NA	NA	NA	NA	NA	NA	NA	0	0	0	0	1	401	0.134	8	100	7.32441	1983.08	0	0	1	0
10340034	NA	NA	NA	NA	NA	NA	NA	NA	NA	0	0	0	0	1	407	0.093	8	100	10.3947	2121.63	0	0	1	0
10340035	NA	NA	NA	NA	NA	NA	NA	NA	NA	2	0	0	0	1	220	0.009	25	100	30.9646	2015.97	0	1	0	0
10341001	NA	NA	NA	NA	NA	NA	NA	NA	NA	0	0	0	0	1	150	0.00356252	65	100	1008.7	2781.85	0	1	0	0
10341002	NA	NA	NA	NA	NA	NA	NA	NA	NA	0	0	0	1	0	130	0.0021051	28	97.5	1039.21	2757.52	0	0	1	0
10341003	NA	NA	NA	NA	NA	NA	NA	NA	NA	2	0	0	0	1	102	0.00198974	46	100	1117.8	2700.81	0	1	0	0
10342001	NA	NA	NA	NA	NA	NA	NA	NA	NA	0	0	0	0	1	682	0.0322161	24	100	91.4809	3948.77	0	0	0	1
10342002	NA	NA	NA	NA	NA	NA	NA	NA	NA	0	0	0	0	1	478	0.019697	17	95	38.4084	3942.59	0	0	0	1
10342003	NA	NA	NA	NA	NA	NA	NA	NA	NA	0	0	0	0	1	335	0.00471995	44	100	110.875	3927.24	0	0	1	0
10342004	NA	NA	NA	NA	NA	NA	NA	NA	NA	0	0	0	0	1	290	0.00475135	29	100	180.52	3861.44	0	1	0	0
10342005	NA	NA	NA	NA	NA	NA	NA	NA	NA	0	0	0	0	1	715	0.0340477	18	100	42.0121	3953.25	0	0	0	1
10342006	NA	NA	NA	NA	NA	NA	NA	NA	NA	0	0	0	0	1	995	0.0622258	125	90	29.0914	3917.32	0	0	0	1
10342007	NA	NA	NA	NA	NA	NA	NA	NA	NA	2	0	0	1	0	371	0.0194595	14	82.5	52.7731	3653.29	0	0	1	0
10342008	NA	NA	NA	NA	NA	NA	NA	NA	NA	0	0	0	0	1	261	0.00631657	34	75	227.624	3669.53	0	0	0	1
10342009	NA	NA	NA	NA	NA	NA	NA	NA	NA	0	0	0	1	0	210	0.00901857	119	100	295.354	3625.75	0	0	0	1
10342010	NA	NA	NA	NA	NA	NA	NA	NA	NA	0	1	0	0	1	305	0.0193604	27	100	12.4763	2858.83	0	0	0	1
10342011	NA	NA	NA	NA	NA	NA	NA	NA	NA	0	0	0	0	1	348	0.0128224	19	75	58.4668	3837.65	0	0	0	1
10342012	NA	NA	NA	NA	NA	NA	NA	NA	NA	0	0	0	0	1	951	0.11	8	100	8.10136	3953.25	0	0	1	0
10343001	NA	NA	NA	NA	NA	NA	NA	NA	NA	0	1	0	0	1	544	0.0241063	71	85	39.583	2943.26	0	0	1	0
10343002	NA	NA	NA	NA	NA	NA	NA	NA	NA	0	0	0	0	1	252	0.00642485	14	100	34.1877	2665.07	0	1	0	0
10343003	NA	NA	NA	NA	NA	NA	NA	NA	NA	0	0	0	1	0	213	0.00434688	120	95	350.797	3438.44	0	0	0	1
10343004	NA	NA	NA	NA	NA	NA	NA	NA	NA	0	0	0	1	0	173	0.000766088	38	95	382.101	3326.64	1	0	0	0
10343005	NA	NA	NA	NA	NA	NA	NA	NA	NA	0	0	0	0	1	218	0.0103113	11	100	12.0626	1952.97	1	0	0	0
10343006	NA	NA	NA	NA	NA	NA	NA	NA	NA	0	0	0	1	0	166	0.0041031	52	100	521.918	2965.02	0	1	0	0
10343007	NA	NA	NA	NA	NA	NA	NA	NA	NA	0	1	1	0	0	242	0.00686661	14	100	48.3825	2020.6	0	1	0	0
10343008	NA	NA	NA	NA	NA	NA	NA	NA	NA	0	0	1	0	0	174	0.00492508	18	100	522.069	2964.75	0	1	0	0
10343009	NA	NA	NA	NA	NA	NA	NA	NA	NA	0	0	0	0	1	127	0.00196499	49	95	570.8	2878.4	0	1	0	0
10343010	NA	NA	NA	NA	NA	NA	NA	NA	NA	0	0	0	0	1	166	0.00885919	40	100	547.213	2918.29	0	1	0	0
10343011	NA	NA	NA	NA	NA	NA	NA	NA	NA	0	0	0	0	1	164	0.00712589	9	100	559.087	2897.81	0	1	0	0
10343012	NA	NA	NA	NA	NA	NA	NA	NA	NA	0	0	0	0	1	121	0.000146671	28	100	632.456	2788.15	1	0	0	0
10343013	NA	NA	NA	NA	NA	NA	NA	NA	NA	0	0	0	0	1	168	0.00903955	2	90	15.9722	1951.2	1	0	0	0
10343014	NA	NA	NA	NA	NA	NA	NA	NA	NA	0	0	0	0	1	120	0.00179288	55	100	685.762	2723.1	0	1	0	0
10343015	NA	NA	NA	NA	NA	NA	NA	NA	NA	0	2	0	0	1	138	0.012239	15	100	665.869	2746.1	0	1	0	0
10343016	NA	NA	NA	NA	NA	NA	NA	NA	NA	0	0	0	0	1	124	0.0103986	53	100	689.435	2718.98	0	1	0	0
10343017	NA	NA	NA	NA	NA	NA	NA	NA	NA	0	0	0	0	1	94	0.00267885	52	100	711.53	2695.13	0	1	0	0
10344001	NA	NA	NA	NA	NA	NA	NA	NA	NA	0	0	0	0	1	167	0.00347072	27	90	21.6124	1950.34	0	1	0	0
10344002	NA	NA	NA	NA	NA	NA	NA	NA	NA	0	0	0	1	0	135	0.00145867	101	100	31.4769	1950.29	0	1	0	0
10344004	NA	NA	NA	NA	NA	NA	NA	NA	NA	0	0	0	0	1	126	0.00165418	40	100	55.2004	1950.24	0	1	0	0
10344005	NA	NA	NA	NA	NA	NA	NA	NA	NA	0	1	0	0	1	108	0.00236633	72	100	1931.27	2659.04	0	1	0	0
10344006	NA	NA	NA	NA	NA	NA	NA	NA	1	2	0	0	1	0	70	0.000218699	80	75	1852.81	2689.12	0	1	0	0
10344007	NA	NA	NA	NA	NA	NA	NA	NA	NA	0	0	1	0	0	72	0.00327011	46	90	2057.32	2612.05	0	1	0	0
10344008	NA	NA	NA	NA	NA	NA	NA	NA	NA	1	2	1	0	0	177	0.00633714	40	90	23.0843	1952.81	0	1	0	0
10344009	NA	NA	NA	NA	NA	NA	NA	NA	NA	0	1	1	0	0	128	0.0030841	32	90	106.552	1951.67	0	0	1	0
10344010	NA	NA	NA	NA	NA	NA	NA	NA	NA	0	2	0	0	1	181	0.00681699	4	80	31.4319	1952.97	0	1	0	0
10344011	NA	NA	NA	NA	NA	NA	NA	NA	NA	0	4	0	0	1	155	0.00398316	21	80	51.1512	1952.88	0	1	0	0
10344012	NA	NA	NA	NA	NA	NA	NA	NA	NA	0	0	0	0	1	130	0.00400091	24	90	76.3379	1951.99	0	0	1	0
10344013	NA	NA	NA	NA	NA	NA	NA	NA	NA	0	0	0	1	0	96	0.00426908	29	95	111.296	1941.48	0	0	1	0
10344014	NA	NA	NA	NA	NA	NA	NA	NA	NA	0	0	1	0	0	102	0.00533038	19	65	2058.64	2610.97	0	0	1	0
10344015	NA	NA	NA	NA	NA	NA	NA	NA	NA	0	0	1	0	0	50	0.00122289	156	80	2091.41	2598.45	0	1	0	0
10344016	NA	NA	1	NA	1	NA	NA	1	NA	2	0	1	0	0	35	0.000800747	66	90	2114.43	2591.11	0	1	0	0
10344017	NA	NA	NA	NA	NA	NA	NA	NA	NA	0	3	1	0	0	79	0.00757225	27	82.5	14.8685	1950.18	0	1	0	0
10344018	NA	NA	NA	NA	NA	NA	NA	NA	NA	0	0	1	0	0	30	0.0037037	91	100	2133.86	2585.29	0	1	0	0
10344019	NA	NA	NA	NA	NA	NA	NA	NA	NA	0	2	1	0	0	116	0.00731954	37	100	5.6102	1950.18	0	0	1	0
10350001	NA	NA	NA	NA	NA	NA	NA	NA	NA	0	2	0	1	0	167	0.00258345	17	100	83.1815	1951.83	0	1	0	0
10350002	NA	NA	NA	1	NA	NA	NA	NA	NA	0	0	1	0	0	190	0.00311526	14	80	45.889	1950.9	0	1	0	0
10350003	NA	NA	NA	NA	NA	NA	NA	NA	NA	0	0	0	0	1	150	0.00169276	7	100	83.1683	1951.83	0	1	0	0
10350004	NA	NA	NA	NA	NA	NA	NA	NA	NA	0	0	1	0	0	142	0.00284691	24	100	107.989	1952.09	0	1	0	0
10350005	NA	NA	NA	NA	NA	NA	NA	NA	NA	0	1	0	1	0	164	0.00506789	16	100	151.991	1952.35	0	1	0	0
10350006	NA	NA	NA	NA	NA	NA	NA	NA	NA	0	0	1	0	0	111	0.00205479	21	100	168.206	1952.41	0	1	0	0
10350007	NA	NA	NA	NA	NA	NA	NA	NA	NA	0	2	1	0	0	299	0.030732	15	100	23.111	1952.97	0	1	0	0
10350008	NA	NA	NA	NA	NA	NA	NA	NA	NA	0	0	0	1	0	180	0.0125958	36	100	12.4018	1952.97	0	1	0	0
10350009	NA	NA	NA	NA	NA	NA	NA	NA	NA	0	1	0	0	1	137	0.0149701	9	100	26.2405	1952.97	0	1	0	0
10350010	NA	NA	NA	NA	NA	NA	NA	NA	NA	0	0	1	0	0	102	0.00328947	4.26	100	169.111	1952.41	0	1	0	0
10350011	NA	NA	NA	NA	NA	NA	NA	NA	NA	0	2	1	0	0	198	0.0143476	22	95	204.502	1952.51	0	0	1	0
10350012	NA	NA	NA	NA	NA	NA	NA	NA	NA	0	1	1	0	0	164	0.00227445	16	100	42.9364	1951.83	0	1	0	0
10350013	NA	NA	NA	NA	NA	NA	NA	NA	NA	0	2	1	0	0	177	0.00334346	35	100	52.2782	1951.72	0	1	0	0
10350014	NA	NA	NA	NA	NA	NA	NA	NA	NA	0	4	0	0	1	179	0.00324367	14	80	51.095	1952.01	0	1	0	0
10350015	NA	NA	NA	NA	NA	NA	NA	NA	NA	0	0	1	0	0	163	0.0026528	19	100	94.3556	1952.26	0	1	0	0
10350016	NA	NA	NA	NA	NA	NA	NA	NA	NA	0	0	1	0	0	147	0.00622665	48	100	50.9558	1952.01	0	1	0	0
10350017	NA	NA	NA	NA	NA	NA	NA	NA	NA	0	0	1	0	0	137	0.0017741	11	100	133.146	1952.47	0	1	0	0
10350018	NA	NA	NA	NA	NA	NA	NA	NA	NA	0	0	1	0	0	119	0.00416667	10	100	139.24	1952.49	0	1	0	0
10350019	NA	NA	NA	NA	NA	NA	NA	NA	NA	0	0	1	0	0	99	0.0011325	12	100	140.278	1952.5	0	1	0	0
10351001	NA	NA	NA	NA	NA	NA	NA	NA	NA	0	1	1	0	0	183	0.00575412	13	100	17.8562	1952.97	0	1	0	0
10351002	NA	NA	NA	NA	NA	NA	NA	NA	NA	0	3	1	0	0	164	0.0126235	15	82.5	9.42878	1952.97	0	1	0	0
10351003	NA	NA	NA	NA	NA	NA	NA	NA	NA	0	0	1	0	0	130	0.00421348	10	95	44.7608	1952.97	0	1	0	0
10351004	NA	NA	NA	NA	NA	NA	NA	NA	NA	0	0	0	1	0	99	0.00186567	37	100	355.568	1952.52	0	1	0	0
10351005	NA	NA	NA	NA	NA	NA	NA	NA	NA	0	0	1	0	0	96	0.00110294	24	100	631.3	1955.27	0	1	0	0
10351006	NA	NA	NA	NA	NA	NA	NA	NA	NA	0	2	1	0	0	202	0.0128349	16	100	255.061	1959.29	0	0	1	0
10351007	NA	NA	NA	NA	NA	NA	NA	NA	NA	1	2	1	0	0	301	0.0124571	4	100	28.6119	1957.72	0	1	0	0
10351008	NA	NA	NA	NA	NA	NA	NA	NA	NA	0	0	1	0	0	302	0.011291	4	95	40.4489	1989.48	0	1	0	0
10351009	NA	NA	NA	NA	NA	NA	NA	NA	NA	0	2	1	0	0	158	0.00608808	14	100	131.767	1964.16	0	1	0	0
10351010	NA	NA	NA	NA	NA	NA	NA	NA	NA	0	2	1	0	0	160	0.00384588	9	100	131.914	1964.15	0	1	0	0
10351011	NA	NA	NA	NA	NA	NA	NA	NA	NA	0	1	1	0	0	112	0.00211689	25	100	682.89	1955.09	0	1	0	0
10351012	NA	NA	NA	NA	NA	NA	NA	NA	NA	0	0	1	0	0	161	0.00848776	19	100	116.419	1954.14	0	1	0	0
10351013	NA	NA	NA	NA	NA	NA	NA	NA	NA	0	0	0	1	0	97	0.00299103	22	90	717.071	1954.99	0	1	0	0
10352001	NA	NA	NA	NA	NA	NA	NA	NA	NA	0	1	1	0	0	174	0.00270103	22	100	47.7645	1950.18	0	1	0	0
10352002	NA	NA	NA	NA	NA	NA	NA	NA	NA	0	0	1	0	0	139	0.00255046	12	100	81.4672	1950.71	0	1	0	0
10352003	NA	NA	NA	NA	NA	NA	NA	NA	NA	0	4	0	0	1	165	0.00861437	37	100	10.342	1952.97	0	1	0	0
10352004	NA	NA	NA	NA	NA	NA	NA	NA	NA	0	0	0	0	1	118	0.0030303	40	100	0.107604	1952.97	0	1	0	0
10352005	NA	NA	NA	NA	NA	NA	NA	NA	NA	0	1	1	0	0	144	0.00213388	7	70	125.491	1950.55	0	1	0	0
10352006	NA	NA	NA	NA	NA	NA	NA	NA	NA	0	0	0	0	1	118	0.00144277	31	100	179.919	1951.2	0	1	0	0
10352007	NA	NA	NA	NA	NA	NA	NA	NA	NA	0	5	1	0	0	137	0.00456053	34	95	27.3265	1952.97	0	1	0	0
10352008	NA	NA	NA	NA	NA	NA	NA	NA	NA	2	7	1	0	0	136	0.00453018	4.5	75	9.37587	1952.97	0	1	0	0
10352009	NA	NA	NA	NA	NA	NA	NA	NA	NA	0	0	1	0	0	105	0.027933	50	100	0.0599624	1952.97	0	1	0	0
10352010	NA	NA	NA	NA	NA	NA	NA	NA	NA	0	0	1	0	0	100	0.0030821	16	100	416.038	1951.06	0	1	0	0
10352011	NA	NA	NA	NA	NA	NA	NA	NA	NA	0	1	0	0	1	155	0.00252207	30	100	6.70647	1950.18	0	1	0	0
10352012	NA	NA	NA	NA	NA	NA	NA	NA	NA	0	3	1	0	0	175	0.00593415	19	92.5	11.5618	1950.18	0	1	0	0
10352013	NA	NA	NA	NA	NA	NA	NA	NA	NA	0	1	1	0	0	144	0.0032	30	100	44.5182	1950.18	0	1	0	0
10352014	NA	NA	NA	NA	NA	NA	NA	NA	NA	0	1	1	0	0	168	0.00497663	30	100	11.9735	1950.18	0	1	0	0
10352015	NA	NA	NA	NA	NA	NA	NA	NA	NA	1	0	1	0	0	151	0.00432683	10	85	24.0908	1950.18	0	1	0	0
10352016	NA	NA	NA	NA	NA	NA	NA	NA	NA	0	0	1	0	0	137	0.00609384	3	100	44.4899	1950.18	0	1	0	0
10352017	NA	NA	NA	NA	NA	NA	NA	NA	NA	0	0	1	0	0	127	0.00174064	28	100	53.8708	1950.18	0	1	0	0
10352018	NA	NA	NA	NA	NA	NA	NA	NA	NA	0	3	1	0	0	138	0.00430707	20	90	53.855	1950.18	0	1	0	0
10352019	NA	NA	NA	NA	NA	NA	NA	NA	NA	0	1	1	0	0	121	0.00314375	26	100	57.3654	1950.18	0	1	0	0
10352020	NA	NA	NA	NA	NA	NA	NA	NA	NA	0	0	1	0	0	131	0.00417246	29	100	82.6572	1950.22	0	1	0	0
10352021	NA	NA	NA	NA	NA	NA	NA	NA	NA	0	0	1	0	0	109	0.00126582	22	100	75.1129	1950.23	0	1	0	0
10352022	NA	NA	NA	NA	NA	NA	NA	NA	NA	0	7	1	0	0	150	0.00456447	35	95	21.946	1950.18	0	1	0	0
10352023	NA	NA	NA	NA	NA	NA	NA	NA	NA	0	0	1	0	0	126	0.003153	16	100	40.755	1950.19	0	1	0	0
10352024	NA	NA	NA	NA	NA	NA	NA	NA	NA	0	0	1	0	0	109	0.00285714	29	100	140.249	1950.21	0	1	0	0
10352025	NA	NA	NA	NA	NA	NA	NA	NA	NA	0	0	1	0	0	109	0.00227654	25	100	152.307	1950.43	0	1	0	0
10352026	NA	NA	NA	NA	NA	NA	NA	NA	NA	0	1	1	0	0	123	0.00320285	19	100	5.79189	1952.86	0	1	0	0
10352027	NA	NA	NA	NA	NA	NA	NA	NA	NA	0	5	0	1	0	118	0.00170503	20	100	17.8214	1951.54	0	1	0	0
10352029	NA	NA	NA	NA	NA	NA	NA	NA	NA	0	0	1	0	0	114	0.00650759	35	100	20.5761	1951.73	0	1	0	0
10352030	NA	NA	NA	NA	NA	NA	NA	NA	NA	0	1	1	0	0	116	0.0028885	22	80	20.5761	1951.73	0	1	0	0
10352031	NA	NA	NA	NA	NA	NA	NA	NA	NA	0	1	0	0	1	108	0.00500695	13	100	27.0437	1952.03	0	1	0	0
10352032	NA	NA	NA	NA	NA	NA	NA	NA	NA	0	0	0	0	1	93	0.00385505	16	100	180.971	1950.69	0	1	0	0
10352033	NA	NA	NA	NA	NA	NA	NA	NA	NA	1	10	1	0	0	118	0.00158755	27	100	232.099	1950.91	0	1	0	0
10352035	NA	NA	NA	NA	NA	NA	NA	NA	NA	0	0	1	0	0	98	0.00628931	9	95	233.486	1950.92	0	1	0	0
10352036	NA	NA	NA	NA	NA	NA	NA	NA	NA	0	0	0	0	1	90	0.00301205	18	100	441.996	1951.17	0	1	0	0
10353001	NA	NA	NA	NA	NA	NA	NA	NA	NA	0	0	1	0	0	66	0.000643087	30	90	1170.67	1953.53	0	1	0	0
10353002	NA	NA	NA	NA	NA	NA	NA	NA	NA	0	3	1	0	0	125	0.0129547	16	85	7.28016	1952.97	0	1	0	0
10353003	NA	NA	NA	NA	NA	NA	NA	NA	NA	0	1	0	1	0	73	0.000227669	38	100	1222.5	1953.51	0	1	0	0
10353004	NA	NA	NA	NA	NA	NA	NA	NA	NA	0	7	1	0	0	232	0.0174371	17	100	17.0649	1952.97	0	1	0	0
10353005	NA	NA	NA	NA	NA	NA	NA	NA	NA	0	0	1	0	0	63	0.0019943	26	100	1247.04	1953.5	0	1	0	0
10353006	NA	NA	NA	NA	NA	NA	NA	NA	NA	0	0	0	0	1	846	0.0855568	18	100	15.5083	2753.04	0	0	1	0
10353007	NA	NA	NA	NA	NA	NA	NA	NA	NA	0	0	0	0	1	251	0.0122617	33	100	70.7694	2441	0	1	0	0
10353008	NA	NA	NA	NA	NA	NA	NA	NA	NA	0	0	0	0	1	599	0.0542391	12	100	23.354	2329.1	0	0	1	0
10353009	NA	NA	NA	NA	NA	NA	NA	NA	NA	0	0	1	0	0	100	0.00158461	10	100	104.053	2304.4	0	1	0	0
10353010	NA	NA	NA	NA	NA	NA	NA	NA	NA	0	2	1	0	0	137	0.0111305	8	95	11.8902	1955.57	0	1	0	0
10353011	NA	NA	NA	NA	NA	NA	NA	NA	NA	0	0	1	0	0	86	0.00116335	14	100	139.553	2215.06	0	1	0	0
10353012	NA	NA	NA	NA	NA	NA	NA	NA	NA	0	0	0	1	0	74	0.00112423	10	100	165.098	2174.45	0	1	0	0
10353013	NA	NA	NA	NA	NA	NA	NA	NA	NA	0	0	1	0	0	55	0.000542299	48	100	1426.6	1979.07	0	1	0	0
10353014	NA	NA	NA	NA	NA	NA	NA	NA	NA	0	0	1	0	0	108	0.0157253	20	100	6.95003	1952.97	0	1	0	0
10353015	NA	NA	NA	NA	NA	NA	NA	NA	NA	0	0	1	0	0	63	0.00347162	29	100	1540.42	1977.35	0	1	0	0
10353016	NA	NA	NA	NA	NA	NA	NA	NA	NA	0	0	0	0	1	368	0.033215	42	90	16.7056	1952.97	0	1	0	0
10353017	NA	NA	NA	NA	NA	NA	NA	NA	NA	0	2	0	0	1	363	0.0569935	4	90	25.4652	1952.97	0	0	1	0
10353018	NA	NA	NA	NA	NA	NA	NA	NA	NA	0	0	1	0	0	134	0.00561187	15	90	61.1334	1958.22	0	0	1	0
10353019	NA	NA	NA	NA	NA	NA	NA	NA	NA	0	1	1	0	0	74	0.00459123	18	97.5	101.691	1956.13	0	1	0	0
10354001	NA	NA	NA	NA	NA	NA	NA	NA	NA	0	0	1	0	0	288	0.0250777	7	100	48.8272	1952.97	0	1	0	0
10354002	NA	NA	NA	NA	NA	NA	NA	NA	NA	0	0	1	0	0	364	0.0320949	24	100	8.35904	1952.97	0	1	0	0
10354003	NA	NA	NA	NA	NA	NA	NA	NA	NA	0	1	1	0	0	180	0.0168446	9	100	48.8272	1952.97	0	1	0	0
10354004	NA	NA	NA	NA	NA	NA	NA	NA	NA	0	0	0	0	1	68	0.00604894	5	100	53.4122	1952.97	0	1	0	0
10354005	NA	NA	NA	NA	NA	NA	NA	NA	NA	0	0	1	0	0	62	0.00210865	35	90	1627.43	1976.05	0	1	0	0
10354006	NA	NA	NA	NA	NA	NA	NA	NA	NA	0	0	1	0	0	46	0.00248344	19	95	2157.27	1969.94	0	1	0	0
10355001	NA	NA	NA	NA	NA	NA	NA	NA	NA	1	0	0	1	0	154	0.00319927	15	75	35.7787	1950.18	0	1	0	0
10355003	NA	NA	NA	NA	NA	NA	NA	NA	NA	0	4	1	0	0	142	0.00330075	8	95	62.1106	1950.18	0	1	0	0
10355004	NA	NA	NA	NA	NA	NA	NA	NA	NA	0	2	0	1	0	148	0.0034794	8	100	27.4901	1950.18	0	1	0	0
10355005	NA	NA	NA	NA	NA	NA	NA	NA	NA	0	5	0	1	0	177	0.00419249	13	100	31.1909	1950.18	0	1	0	0
10355006	NA	NA	NA	NA	NA	NA	NA	NA	NA	0	0	1	0	0	131	0.00229016	11	100	88.7365	1950.18	0	1	0	0
10355007	NA	NA	NA	NA	NA	NA	NA	NA	NA	0	1	0	1	0	116	0.00160668	8	100	148.761	1950.25	0	1	0	0
10355008	NA	NA	NA	NA	NA	NA	NA	NA	NA	0	4	0	1	0	131	0.00444576	9	87.5	5.80733	1951.47	0	1	0	0
10355009	NA	NA	NA	NA	NA	NA	NA	NA	NA	1	3	0	1	0	119	0.0025663	15	95	57.1769	1950.37	0	1	0	0
10355010	NA	NA	NA	NA	NA	NA	NA	NA	NA	0	0	0	0	1	106	0.00209937	15	90	173.498	1950.46	0	1	0	0
10355011	NA	NA	NA	NA	NA	NA	NA	NA	NA	0	5	0	0	1	126	0.00677257	11	95	53.0702	1952.97	0	1	0	0
10355012	NA	NA	NA	NA	NA	NA	NA	NA	NA	0	3	0	0	1	112	0.00674195	16	98	34.3565	1952.97	0	1	0	0
10355013	NA	NA	NA	NA	NA	NA	NA	NA	NA	0	2	0	0	1	115	0.00862069	26	95	13.5089	1952.97	0	1	0	0
10355014	NA	NA	NA	NA	NA	NA	NA	NA	NA	0	0	0	0	1	72	0.000414079	26	100	66.8318	1952.97	0	1	0	0
10355015	NA	NA	NA	NA	NA	NA	NA	NA	NA	2	3	0	1	0	87	0.00364338	9	90	81.2401	1952.97	0	1	0	0
10355016	NA	NA	NA	NA	NA	NA	NA	NA	NA	0	0	0	1	0	70	0.00146444	8	95	115.464	1952.97	0	1	0	0
10355017	NA	NA	NA	NA	NA	NA	NA	NA	NA	0	3	0	0	1	104	0.00811751	22	100	4.6805	1950.31	0	1	0	0
10355018	NA	NA	NA	NA	NA	NA	NA	NA	NA	1	1	0	0	1	87	0.000931833	10	92.5	309.81	1951.55	0	1	0	0
10355019	NA	NA	NA	NA	NA	NA	NA	NA	NA	0	0	0	1	0	56	0.00237812	11	100	517.706	1951.14	0	1	0	0
10355020	NA	NA	NA	NA	NA	NA	NA	NA	NA	0	2	0	0	1	124	0.00379572	25	100	11.8338	1950.18	0	1	0	0
10355021	NA	NA	NA	NA	NA	NA	NA	NA	NA	1	3	1	0	0	117	0.00259965	10	87.5	10.2956	1950.18	0	1	0	0
10355022	NA	NA	NA	NA	NA	NA	NA	NA	NA	0	3	0	1	0	102	0.00182565	6	100	23.6123	1950.32	0	1	0	0
10355023	NA	NA	NA	NA	NA	NA	NA	NA	NA	0	0	0	1	0	85	0.00395322	12	100	193.4	1950.34	0	1	0	0
10355024	NA	NA	NA	NA	NA	NA	NA	NA	NA	5	10	1	0	0	120	0.00333485	38	62.5	16.6974	1950.18	0	1	0	0
10355025	NA	NA	NA	NA	NA	NA	NA	NA	NA	0	3	1	0	0	150	0.00316742	5	85	43.1523	1950.18	0	1	0	0
10355026	NA	NA	NA	NA	NA	NA	NA	NA	NA	2	5	1	0	0	124	0.00238793	14	40	66.5761	1950.18	0	1	0	0
10355027	NA	NA	NA	NA	NA	NA	NA	NA	NA	0	5	1	0	0	116	0.002228	4	15	76.2301	1950.18	0	1	0	0
10355028	NA	NA	NA	NA	NA	NA	NA	NA	NA	1	0	0	1	0	101	0.00104712	6	100	82.0317	1950.18	0	1	0	0
10355029	NA	NA	NA	NA	NA	NA	NA	NA	NA	0	0	1	0	0	98	0.00269397	14	90	113.554	1950.18	0	1	0	0
10355030	NA	NA	NA	NA	NA	NA	NA	NA	NA	0	5	0	1	0	103	0.00161708	8	60	31.0719	1950.18	0	1	0	0
10355031	NA	NA	NA	NA	NA	NA	NA	NA	NA	0	1	0	1	0	83	0.00263968	13	100	196.605	1950.38	0	1	0	0
10355032	NA	NA	NA	NA	NA	NA	NA	NA	NA	0	0	0	1	0	61	0.00327225	19	100	202.882	1950.46	0	1	0	0
10355033	NA	NA	NA	NA	NA	NA	NA	NA	NA	0	0	0	1	0	46	0.00161193	16	100	524.189	1951.16	0	1	0	0
10356001	NA	NA	NA	NA	NA	NA	NA	NA	NA	0	2	0	0	1	114	0.00193887	16	100	10.633	1950.18	0	1	0	0
10356002	NA	NA	NA	NA	NA	NA	NA	NA	NA	1	0	0	0	1	97	0.00123571	7	95	57.419	1950.18	0	1	0	0
10356003	NA	NA	NA	NA	NA	NA	NA	NA	NA	0	0	0	1	0	81	0.00355677	3	100	86.6607	1950.51	0	1	0	0
10356004	NA	NA	NA	NA	NA	NA	NA	NA	NA	0	0	0	0	1	78	0.00559016	15	100	31.3001	1951.13	0	1	0	0
10356005	NA	NA	NA	NA	NA	NA	NA	NA	NA	0	0	0	0	1	47	0.00158983	16	100	2198.52	1969.59	0	1	0	0
10356006	NA	NA	NA	NA	NA	NA	NA	NA	NA	0	1	0	0	1	311	0.060899	5	100	2.10836	1952.97	0	1	0	0
10356007	NA	NA	NA	NA	NA	NA	NA	NA	NA	0	0	0	0	1	206	0.0134529	8	100	4.81302	1952.97	0	1	0	0
10356008	NA	NA	NA	NA	NA	NA	NA	NA	NA	0	0	0	0	1	185	0.00733378	4	97.5	77.3995	1952.97	0	1	0	0
10356009	NA	NA	NA	NA	NA	NA	NA	NA	NA	0	2	0	0	1	347	0.0258536	4	100	25.8871	1952.97	0	1	0	0
10356010	NA	NA	NA	NA	NA	NA	NA	NA	NA	0	0	0	1	0	110	0.00500163	10	90	100.335	1952.97	0	0	1	0
10356011	NA	NA	NA	NA	NA	NA	NA	NA	NA	0	0	1	0	0	64	0.00225897	24	90	2314.66	1968.76	0	1	0	0
10356012	NA	NA	NA	NA	NA	NA	NA	NA	NA	0	0	1	0	0	43	0.00668693	33	100	2200.53	1969.58	0	1	0	0
10356013	NA	NA	NA	NA	NA	NA	NA	NA	NA	0	0	1	0	0	31	0.000554324	44	100	2413.11	1968.03	0	1	0	0
10356014	NA	NA	NA	NA	NA	NA	NA	NA	NA	0	0	0	0	1	29	0.000365631	41	100	2440.13	1967.86	0	1	0	0
10356015	NA	NA	NA	NA	NA	NA	NA	NA	NA	0	2	1	0	0	160	0.0222967	48	95	14.5071	1952.97	0	1	0	0
10356016	NA	NA	NA	NA	NA	NA	NA	NA	NA	0	0	0	0	1	31	0.00158033	65	100	2469.55	1967.67	0	1	0	0
10356019	NA	NA	NA	NA	NA	NA	NA	NA	NA	0	0	1	0	0	195	0.020798	9	100	2.44608	1952.97	0	1	0	0
10356020	NA	NA	NA	NA	NA	NA	NA	NA	NA	0	0	0	1	0	129	0.0150282	10	100	4.26903	1952.97	0	1	0	0
10360001	NA	NA	1	NA	NA	NA	NA	NA	NA	0	0	0	0	1	24	0.000707965	108	100	4641.65	2247.4	0	1	0	0
10361001	NA	NA	NA	1	NA	NA	NA	NA	NA	1	7	0	0	1	209	0.00568637	32	95	36.2592	1952.97	0	1	0	0
10361002	NA	NA	NA	NA	NA	NA	NA	NA	NA	1	2	0	0	1	224	0.00610288	20	100	5.52109	1952.97	0	1	0	0
10361003	NA	NA	NA	1	1	NA	1	NA	1	1	0	0	0	1	131	0.00345683	19	100	207.358	1952.47	1	0	0	0
10361004	NA	NA	NA	NA	NA	NA	NA	NA	NA	0	0	0	0	1	203	0.00587659	8	100	7.91675	1952.97	0	1	0	0
10361005	NA	NA	NA	NA	NA	NA	NA	NA	NA	0	1	0	0	1	192	0.0070401	9	95	7.94334	1952.97	0	1	0	0
10361006	NA	NA	NA	NA	NA	NA	NA	NA	NA	0	1	0	0	1	169	0.00835138	12	100	22.9318	1952.97	0	1	0	0
10361007	NA	NA	NA	NA	NA	NA	NA	NA	1	0	0	1	0	0	148	0.00413983	5	100	5.04755	1952.97	0	1	0	0
10361008	NA	NA	NA	1	NA	NA	NA	NA	NA	0	0	1	0	0	130	0.00315374	9	100	110.673	1952.97	0	1	0	0
10361009	NA	NA	NA	NA	NA	NA	NA	NA	NA	0	6	0	0	1	150	0.00464037	4	40	39.5401	1952.97	1	0	0	0
10361010	NA	NA	NA	1	NA	NA	1	NA	NA	0	3	1	0	0	126	0.00335673	4	90	132.039	1952.77	1	0	0	0
10361011	NA	NA	NA	NA	NA	NA	NA	NA	NA	0	3	0	0	1	251	0.00638104	6	100	18.5632	1952.97	0	1	0	0
10361012	NA	NA	NA	1	NA	NA	NA	NA	1	0	3	0	0	1	231	0.00998839	9	95	6.17965	1952.97	0	1	0	0
10361013	NA	NA	NA	NA	NA	NA	NA	NA	NA	0	3	0	0	1	188	0.00580951	6	100	42.971	1952.97	1	0	0	0
10361014	NA	NA	NA	1	NA	NA	NA	NA	NA	0	1	0	0	1	150	0.00392993	8	100	106.209	1952.97	0	1	0	0
10361015	NA	NA	NA	NA	NA	NA	NA	NA	1	0	1	0	0	1	223	0.00867086	5	100	24.3716	1952.97	0	1	0	0
10361016	NA	NA	NA	1	NA	NA	1	NA	1	2	0	0	0	1	149	0.0026751	10	100	101.232	1952.97	0	1	0	0
10361017	NA	NA	NA	NA	NA	NA	NA	NA	NA	0	1	0	0	1	116	0.00273512	20	100	7.93566	1950.53	0	1	0	0
10361018	NA	NA	NA	NA	NA	NA	NA	NA	NA	0	0	0	0	1	105	0.00289143	25	100	219.693	1952.34	1	0	0	0
10361019	NA	NA	NA	NA	NA	NA	NA	NA	NA	0	0	0	1	0	85	0.00321673	31	95	224.522	1951.96	0	1	0	0
10362001	NA	NA	NA	NA	NA	NA	NA	NA	NA	0	0	0	1	0	146	0.00325348	6	100	22.3692	1952.85	0	1	0	0
10362002	NA	NA	NA	1	NA	NA	1	NA	NA	0	0	1	0	0	111	0.00244187	10	100	33.3036	1952.24	0	1	0	0
10362003	NA	NA	NA	NA	NA	NA	NA	NA	NA	3	0	1	0	0	118	0.00341297	13	100	63.8997	1952.14	0	1	0	0
10362004	NA	NA	NA	NA	NA	NA	NA	NA	NA	0	2	1	0	0	113	0.00255428	4	20	12.0767	1538.89	0	1	0	0
10362005	NA	NA	NA	NA	NA	NA	NA	NA	NA	0	4	0	0	1	94	0.00202952	8	60	41.7857	1127.49	0	1	0	0
10362006	NA	NA	NA	NA	NA	NA	NA	NA	NA	0	4	1	0	0	74	0.00684088	14	100	487.62	1654.23	0	1	0	0
10362007	NA	NA	NA	NA	NA	NA	NA	NA	NA	0	0	1	0	0	88	0.00190939	21	100	83.3809	1824.32	0	1	0	0
10362008	NA	NA	NA	NA	NA	NA	1	1	NA	0	0	1	0	0	77	0.00338666	13	100	101.739	1667.72	0	0	1	0
10362009	NA	NA	NA	NA	NA	NA	1	1	1	0	0	1	0	0	79	0.00204205	23	100	409.527	1770.19	0	1	0	0
10362010	NA	NA	NA	NA	NA	NA	1	NA	1	1	0	1	0	0	52	0.00223621	20	100	484.712	1658.46	0	0	1	0
10362011	NA	NA	NA	NA	NA	NA	NA	NA	NA	0	0	1	0	0	25	0.000238892	22	100	497.954	1639.76	0	1	0	0
10362013	NA	NA	NA	NA	NA	NA	NA	NA	NA	0	3	0	1	0	64	0.00456853	20	60	13.8859	954.167	0	1	0	0
10362014	NA	NA	NA	NA	NA	NA	NA	NA	NA	0	2	0	0	1	90	0.00330715	5	100	2.37712	954.167	0	1	0	0
10363001	NA	NA	NA	NA	NA	NA	NA	NA	NA	0	0	0	1	0	143	0.00852273	16	100	7.80722	1952.97	0	0	1	0
10363002	NA	NA	NA	NA	NA	NA	NA	NA	NA	0	1	0	0	1	168	0.0173878	10	100	7.80722	1952.97	0	0	1	0
10363003	NA	NA	NA	NA	NA	NA	NA	NA	NA	0	1	0	0	1	317	0.0240599	9	100	18.698	1952.97	0	1	0	0
10363004	NA	NA	NA	NA	NA	NA	NA	NA	NA	0	1	0	0	1	248	0.0499643	9	100	32.9188	1952.97	0	1	0	0
10363005	NA	NA	NA	NA	NA	NA	NA	NA	NA	0	1	0	0	1	161	0.014454	9	100	29.4792	1952.97	0	1	0	0
10363006	NA	NA	NA	NA	NA	NA	NA	NA	NA	0	0	0	0	1	107	0.0102405	9	100	68.1186	1952.97	0	1	0	0
10363007	NA	NA	NA	NA	NA	NA	NA	NA	NA	0	1	0	1	0	125	0.00816549	8	100	20.9442	1952.97	0	1	0	0
10363008	NA	NA	NA	NA	NA	NA	NA	NA	NA	0	1	1	0	0	105	0.0117233	9	100	5.53958	1952.97	0	1	0	0
10363009	NA	NA	NA	NA	NA	NA	NA	NA	NA	0	0	0	1	0	95	0.00946475	8	100	29.0914	1952.97	0	1	0	0
10363010	NA	NA	NA	NA	NA	NA	NA	NA	NA	0	1	0	1	0	66	0.00558833	10	100	97.8587	1952.94	0	1	0	0
10363011	NA	NA	NA	NA	NA	NA	NA	NA	NA	0	1	0	1	0	149	0.0183801	21	100	12.5685	1952.69	0	1	0	0
10363012	NA	NA	NA	NA	NA	NA	NA	NA	NA	0	0	0	0	1	30	0.00250701	9	100	108.7	1948.33	0	1	0	0
10363013	NA	NA	NA	NA	NA	NA	NA	NA	NA	0	1	0	1	0	249	0.0457689	8	100	17.1512	1952.97	0	1	0	0
10363014	NA	NA	NA	NA	NA	NA	NA	NA	NA	0	0	0	0	1	194	0.0351894	9	100	12.011	1952.97	0	1	0	0
10363015	NA	NA	NA	NA	NA	NA	NA	NA	NA	0	1	0	1	0	24	0.0047681	14	100	21.771	1909.63	0	1	0	0
10363016	NA	NA	NA	NA	NA	NA	NA	NA	NA	0	0	1	0	0	93	0.00674157	8	40	5429.61	2126.37	0	1	0	0
10363017	NA	NA	NA	NA	NA	NA	NA	NA	NA	0	3	1	0	0	89	0.00496196	7	30	11.8139	954.167	0	1	0	0
10363018	NA	NA	NA	NA	NA	NA	NA	NA	NA	0	1	1	0	0	104	0.00228525	7	30	23.501	954.167	0	1	0	0
10363019	NA	NA	NA	NA	NA	NA	NA	NA	NA	0	0	0	0	1	87	0.00210055	9	95	51.4585	954.167	0	1	0	0
10363020	NA	NA	NA	NA	NA	NA	NA	NA	NA	0	0	1	0	0	101	0.00183113	8	50	15.5016	1377.35	0	1	0	0
10363021	NA	NA	NA	NA	NA	NA	NA	NA	NA	0	1	1	0	0	98	0.002886	5	10	14.5771	1404.37	0	1	0	0
10363022	NA	NA	NA	NA	NA	NA	NA	NA	NA	0	0	1	0	0	92	0.00132246	10	100	34.194	1146.67	0	1	0	0
10363023	NA	NA	NA	NA	NA	NA	NA	NA	NA	0	1	1	0	0	80	0.00409417	6	100	111.174	1013.28	0	1	0	0
10363024	NA	NA	NA	NA	NA	NA	NA	NA	NA	4	5	0	0	1	86	0.0108803	5	80	4.7993	954.167	0	1	0	0
10363025	NA	NA	NA	NA	NA	NA	NA	NA	NA	0	0	0	0	1	66	0.00439611	4	95	63.9912	954.167	0	1	0	0
10363026	NA	NA	NA	NA	NA	NA	NA	NA	NA	0	0	0	0	1	48	0.00273758	9	100	153.635	996.92	0	1	0	0
10363027	NA	NA	NA	NA	NA	NA	NA	NA	NA	1	3	0	1	0	80	0.00765136	8	60	12.4373	954.167	0	1	0	0
10363028	NA	NA	NA	NA	NA	NA	NA	NA	NA	1	3	0	0	1	99	0.0105753	9	100	153.635	996.92	0	1	0	0
10363029	NA	NA	NA	NA	NA	NA	NA	NA	NA	0	0	0	0	1	24	0.000871249	17	95	164.288	994.154	0	1	0	0
10363031	NA	NA	NA	NA	NA	NA	NA	NA	NA	0	0	0	1	0	37	0.00920716	13	100	553.261	1580.65	0	1	0	0
10363032	NA	NA	NA	NA	NA	NA	NA	NA	NA	0	0	1	0	0	21	0.00153453	89	100	5206.1	2173.75	0	1	0	0
10363033	NA	NA	NA	NA	NA	NA	NA	NA	NA	0	0	1	0	0	15	0.000580159	104	100	5395.51	2132.15	0	1	0	0
10363034	NA	NA	NA	NA	NA	NA	NA	NA	NA	0	0	0	0	1	12	0.000203335	78	100	5540.35	2122.47	0	1	0	0
10364001	NA	NA	NA	NA	NA	NA	NA	NA	NA	0	0	0	0	1	164	0.0206379	8	100	81.0429	2005.54	0	1	0	0
10364002	NA	NA	NA	NA	NA	NA	NA	NA	NA	0	0	0	0	1	168	0.0120572	8	100	81.0429	2005.54	0	1	0	0
10364003	NA	NA	NA	NA	NA	NA	NA	NA	NA	0	0	0	0	1	39	0.00226529	8	100	92.436	1999.06	0	1	0	0
10364004	NA	NA	NA	NA	NA	NA	NA	NA	NA	0	0	0	0	1	257	0.0546724	8	100	97.3207	1996.75	0	1	0	0
10364005	NA	NA	NA	NA	NA	NA	NA	NA	NA	0	0	0	0	1	30	0.0016818	8	100	215.266	2019.92	0	1	0	0
10364006	NA	NA	NA	NA	NA	NA	NA	NA	NA	0	0	0	0	1	204	0.016844	8	100	46.4225	2171.56	0	1	0	0
10364007	NA	NA	NA	NA	NA	NA	NA	NA	NA	0	0	0	0	1	50	0.000911815	14	100	57.7018	2128.94	0	1	0	0
10364008	NA	NA	NA	NA	NA	NA	NA	NA	NA	0	0	0	0	1	43	0.00105808	8	100	108.258	2046.72	0	1	0	0
10364009	NA	NA	NA	NA	NA	NA	NA	NA	NA	0	0	0	0	1	34	0.00247642	8	100	259.446	1991.43	0	1	0	0
10364010	NA	NA	NA	NA	NA	NA	NA	NA	NA	0	0	0	0	1	13	0.000556715	25	100	271.962	1946.69	0	1	0	0
10364011	NA	NA	NA	NA	NA	NA	NA	NA	NA	0	0	0	0	1	10	0.000117606	130	100	5595.89	2114.39	0	1	0	0
10364012	NA	NA	NA	NA	NA	NA	NA	NA	NA	0	1	1	0	0	83	0.0123394	14	90	5584.12	2116.8	0	0	1	0
10364013	NA	NA	NA	NA	NA	NA	NA	NA	NA	0	1	1	0	0	50	0.0103457	8	20	5616.57	2110.12	0	0	1	0
10364014	NA	NA	NA	NA	NA	NA	NA	NA	NA	0	0	1	0	0	9	0.000364564	68	100	5598.36	2113.86	0	1	0	0
10364015	NA	NA	NA	NA	NA	NA	NA	NA	NA	0	1	1	0	0	84	0.0165541	8	50	5630.51	2107.28	0	1	0	0
10364016	NA	NA	NA	NA	NA	NA	NA	NA	NA	0	0	1	0	0	8	0	109	100	2.54949	954.167	0	1	0	0
10365001	NA	NA	NA	NA	NA	NA	NA	NA	NA	0	0	0	0	1	75	0.00675178	5	100	64.7533	1842.01	0	1	0	0
10365002	NA	NA	NA	NA	NA	NA	NA	NA	NA	0	1	0	0	1	47	0.00577305	11	100	41.9582	1947.2	0	1	0	0
10365003	NA	NA	NA	NA	NA	NA	NA	NA	NA	0	1	0	0	1	127	0.03082	5	100	12.1536	1934.55	0	1	0	0
10365004	NA	NA	NA	NA	NA	NA	NA	NA	NA	0	0	0	0	1	15	0.00114679	5	90	43.555	1918.53	0	1	0	0
10365005	NA	NA	NA	NA	NA	NA	NA	NA	NA	0	3	0	0	1	14	0.000347303	9	95	90.445	1598.94	0	1	0	0
10365006	NA	NA	NA	NA	NA	NA	NA	NA	NA	0	0	0	1	0	12	0.000763359	9	100	5659.57	2101.36	0	1	0	0
10365007	NA	NA	NA	NA	NA	NA	NA	NA	NA	0	0	1	0	0	100	0.0272673	4	50	8.47748	954.167	0	1	0	0
10365008	NA	NA	NA	NA	NA	NA	NA	NA	NA	0	0	0	0	1	14	0.000414164	75	100	5927.33	2095.08	0	1	0	0
10365009	NA	NA	NA	NA	NA	NA	NA	NA	NA	0	0	0	0	1	12	0.000540541	115	100	6044.31	2082.64	0	1	0	0
10365010	NA	NA	NA	NA	NA	NA	NA	NA	NA	0	0	0	0	1	10	0.000278396	115	100	14455.8	2472.74	0	0	1	0
10365011	NA	NA	NA	NA	NA	NA	NA	NA	NA	0	1	0	0	1	53	0.00968829	36	100	14193.1	2492.18	0	1	0	0
10370001	NA	NA	NA	NA	NA	NA	NA	NA	NA	0	0	0	0	1	602	0.0455985	8	100	41.7834	1901.28	0	1	0	0
10370002	NA	NA	NA	NA	NA	NA	NA	NA	NA	0	0	0	0	1	170	0.0199951	45	100	14531.6	2468.97	0	1	0	0
10370003	NA	NA	NA	NA	NA	NA	NA	NA	NA	0	0	1	0	0	106	0.0127596	5	80	25.3011	1815.65	0	1	0	0
10370004	NA	NA	NA	NA	NA	NA	NA	NA	NA	0	0	1	0	0	26	0.00826446	25	90	6.88608	1460.42	0	0	1	0
10370005	NA	NA	NA	NA	NA	NA	NA	NA	NA	0	0	0	1	0	17	0.000510725	9	100	29.1757	1718.41	0	0	1	0
10370006	NA	NA	NA	NA	NA	NA	NA	NA	NA	0	0	0	0	1	16	0.00538922	12	100	14564.5	2467.32	0	1	0	0
10370007	NA	NA	1	NA	NA	NA	NA	NA	NA	0	0	1	0	0	12	0.000284199	279	92.5	14703.4	2462.94	0	1	0	0
10371001	NA	NA	NA	NA	NA	NA	NA	NA	NA	0	0	0	0	1	821	0.0955453	12	100	19.0368	2175.49	0	0	1	0
10371002	NA	NA	NA	NA	NA	NA	NA	NA	NA	0	0	0	0	1	605	0.0828873	10	100	22.2935	2084.4	0	0	1	0
10371003	NA	NA	NA	NA	NA	NA	NA	NA	NA	1	0	1	0	0	32	0.00206159	7	95	70.226	2055.14	0	0	1	0
10371004	NA	NA	NA	NA	NA	NA	NA	NA	NA	0	0	1	0	0	16	0.000247954	10	100	169.834	2069.8	0	1	0	0
10371005	NA	NA	NA	NA	1	NA	NA	NA	1	0	0	0	0	1	744	0.0512669	11	100	61.9763	2173.76	0	1	0	0
10371006	NA	NA	NA	NA	NA	NA	NA	NA	NA	0	0	1	0	0	50	0.00686836	19	90	79.9925	2111.38	0	0	1	0
10372001	NA	NA	NA	NA	NA	NA	NA	NA	NA	0	0	0	0	1	638	0.058015	12	100	25.1289	2736.96	0	0	1	0
10372002	NA	NA	NA	NA	NA	NA	NA	NA	NA	0	0	0	0	1	364	0.0331599	12	100	25.1289	2736.96	0	0	1	0
10372003	NA	NA	NA	NA	NA	NA	NA	NA	NA	0	0	0	0	1	313	0.128842	27	100	15004.9	2455.98	0	0	1	0
10372004	NA	NA	NA	NA	NA	NA	NA	NA	NA	0	0	0	0	1	769	0.0551151	11	100	27.3799	1808.27	1	0	0	0
10372005	NA	NA	NA	NA	NA	NA	NA	NA	NA	0	0	0	0	1	863	0.0675409	11	100	14943.1	2455.08	0	0	1	0
10372006	NA	NA	NA	NA	NA	NA	NA	NA	NA	0	0	0	0	1	901	0.140752	9	100	57.4903	1808.27	0	0	1	0
10372007	NA	NA	NA	NA	NA	NA	NA	NA	NA	0	0	0	0	1	488	0.0820494	12	100	57.4903	1808.27	0	0	1	0
10372008	NA	NA	NA	NA	NA	NA	NA	NA	NA	0	0	0	0	1	30	0.00506971	39	100	66.1969	1808.8	0	1	0	0
10372009	NA	NA	NA	NA	NA	NA	NA	NA	NA	0	0	0	0	1	484	0.174923	7	100	7.43949	1812.95	0	1	0	0
10372010	NA	NA	NA	NA	NA	NA	NA	NA	NA	0	0	0	0	1	32	0.0150131	48	100	68.6208	1808.78	0	1	0	0
10372011	NA	NA	NA	NA	NA	NA	NA	NA	NA	0	0	0	0	1	12	0.000662252	273	100	14823.5	2459.59	0	1	0	0
10372012	NA	NA	NA	NA	NA	NA	NA	NA	NA	0	0	0	0	1	9	0.000115996	351	100	14919.5	2455.53	0	1	0	0
10372013	NA	NA	NA	NA	NA	NA	NA	NA	NA	0	0	0	0	1	8	0.000188964	354	100	14967.8	2455.18	0	1	0	0
10373001	NA	NA	NA	NA	NA	NA	NA	NA	NA	0	0	0	0	1	748	0.0770541	10	100	25.5422	2145.95	1	0	0	0
10373002	NA	NA	NA	NA	NA	NA	NA	NA	NA	0	0	0	0	1	205	0.0212518	10	100	82.263	2377.78	0	0	1	0
10373003	NA	NA	NA	NA	NA	NA	NA	NA	NA	0	0	0	0	1	811	0.142149	10	100	24.7789	2571.53	0	0	1	0
10373004	NA	NA	NA	NA	NA	NA	NA	NA	NA	0	0	0	0	1	410	0.0601989	10	100	24.7789	2571.53	0	0	1	0
10373005	NA	NA	NA	NA	NA	NA	NA	NA	NA	0	0	0	0	1	64	0.00921659	10	100	81.7703	2374.62	1	0	0	0
10373006	NA	NA	NA	NA	NA	NA	NA	NA	NA	0	0	0	0	1	323	0.132677	10	100	84.1867	2389.57	1	0	0	0
10373007	NA	NA	NA	NA	NA	NA	NA	NA	NA	0	0	0	0	1	40	0.00449309	10	100	102.788	2480.76	1	0	0	0
10373008	NA	NA	NA	NA	NA	NA	NA	NA	NA	0	0	0	0	1	440	0.0556346	10	100	21.6324	2863.8	0	0	1	0
10373009	NA	NA	NA	NA	NA	NA	NA	NA	NA	0	0	0	0	1	8	0.000755401	362	100	15033.2	2456.8	0	0	1	0
10373010	NA	NA	NA	NA	NA	NA	NA	NA	NA	0	0	0	0	1	3	0.000217723	420	100	25.9818	2868.78	0	0	1	0
10373011	NA	NA	NA	NA	NA	NA	NA	NA	NA	0	0	0	0	1	2	0.000531632	540	100	126.674	2553.39	0	0	1	0

## Sheet: metadata
ID	Type
Aplochiton_taeniatus	Presences (1)
Aplochiton_zebra	Presences (1)
Basilichthys_microlepidotus	Presences (1)
Brachygalaxias_bullocki	Presences (1)
Cheirodon_australe	Presences (1)
Diplomystes_camposensis	Presences (1)
Galaxias_maculatus	Presences (1)
Percilia_gillissi	Presences (1)
Trichomycterus_areolatus	Presences (1)
Cross-channel structure	Number of cross-channel structures
Within-channel structure	Number of within-channel structures
Land use: Antr-Antr	Class variable. If both river side had more than 50% of antrhopogenic presences, 1
Land use: Nat-Antr	Class variable. If one river side had anthropogenic presence (> 50%) and the otrer not, 1
Land use: Nat-Nat	Class variable. If both river side had less or equal than 50% of antrhopogenic presences, 1
Altitude	meters
Slope	elevation/segment distance
Channel width	meters
Riparian vegetation	percent of riparian vegetation by river side
Catchment area	km2
Annual rainfall	mm
Source-of-flow: Lakes	Class variable. If Source-of-flow is a lake, 1
Source-of-flow: Foodplain	Class variable. If Source-of-flow is a foodplain, 1
Source-of-flow: Mountains	Class variable. If Source-of-flow is a mountains, 1
Source-of-flow: Valleys	Class variable. If Source-of-flow is a valleys, 1
